# Supplementary material
Source: PubMed Central journal article supplement (PMC3929426)
Supplement: rna-11-66-s01.pdf [file rna-11-66-s01.pdf]

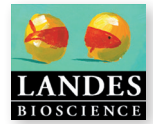

## **Supplemental Material to:**

**Krzysztof Chylinski, Anaïs Le Rhun  
and Emmanuelle Charpentier**

**The tracrRNA and Cas9 families of type II CRISPR-Cas  
immunity systems**

**2013; 10(5)**

**<http://dx.doi.org/10.4161/rna.24321>**

**[www.landesbioscience.com/journals/rnabiology/article/24321/](http://www.landesbioscience.com/journals/rnabiology/article/24321/)**

|           |                                                                    |                       |           |                    |                |                               |                                      |                                           |                          |        |                |                         |
|-----------|--------------------------------------------------------------------|-----------------------|-----------|--------------------|----------------|-------------------------------|--------------------------------------|-------------------------------------------|--------------------------|--------|----------------|-------------------------|
| 30322946  | <i>Veillonella atypica</i> ACS-134-V-Col7a                         | KQYFVGLDITGNSVGVAVT   | -N-----   | TSYELL             | -KFHSHKMGMSRL  | -FEGESAV                      | TRRGF-RSMRRLLERKKRLRLKLEELFADAMAQV   | -DPTFFIRLHESKYHYEDKTHGHSS                 | -KHLIFLDFEDYDQ           | -DYTFE | -YPTIYHLR-KDL  |                         |
| 34762592  | <i>Fusobacterium nucleatum</i> subsp. <i>vincentii</i> ATCC 49256  | FDYVLFQFDIGTNSVGVAVT  | -D-----   | LDNVVL             | -FKFKMKGMSRL   | -FDSAKTAA                     | ERRVQ-RNSRRLLERKKRWRLLLEEIFSEIMKI    | -DSMFFRRLKESLWLDKSNKSE                    | -KFTLFNDNDYKYD           | -      | -DFYKQ         | -YPTIFHLRDELI           |
| 37430777  | <i>Fillifactor aloccis</i> ATCC 35996                              | TRKYLVGLDVGTSVGVAVT   | -D-----   | SQINLC             | -KFKHSHKMGMSRL | -FESANTAK                     | DRRLQ-RGNRRLLERKKQRDLQLQEIFSPEIKCI   | -DPTFFIRLHESSLWLDKSNKSE                   | -KFTLFDYEDYDQ            | -      | -BYTKQ         | -YPTIYHLRDELI           |
| 320529778 | <i>Soiobacterium moorii</i> F0204                                  | QONYVLGDDITGNSVGVAVT  | -D-----   | TDNVVL             | -KFKHSHKMGMSRL | -FDESATAE                     | ERTTH-RGNRRLLERKKRWRLLLEQLFSEIKCI    | -DPMFFIRLHESLNWDEKSKPS                    | -KFTLFDYEDYDQ            | -      | -DYTKKQ        | -YPTIYHLRDELI           |
| 192520075 | <i>Cocciococcus coccus</i> GD-7                                    | KQYFVLGLDVGTSVGVAVT   | -D-----   | STYQVM             | -KHGHKALGMSRL  | -FESASTAE                     | ERRMF-RTARRLLDRNRWRVQLQEIFSEIKKI     | -DQFFIRLHESKESKYPEDKRDACGNCEPL            | -PYALFDNDNDYDQ           | -      | -NYHKQ         | -YPTIYHLRDELI           |
| 42525843  | <i>Treponea denticola</i> ATCC 35405                               | IKDYFLGLDVGTSVGVAVT   | -D-----   | TDYKLL             | -KANRRLDGMSRL  | -FETAETAE                     | VRLLH-RGARRRERKKRKLKLLQFSEIATQ       | -DQFFIRLHESKESKYPEDKRDACGNCEPL            | -ENTLFNDKDFPAK           | -      | -TYHKA         | -YPTIYHLRDELI           |
| 304438954 | <i>Peptinophilus duerdenii</i> ATCC BAA-1640                       | LKEYVILGLDVGTSVGVAVT  | -D-----   | ESYNIP             | -KFKGKMGMSRL   | -FDDAKTAE                     | ERTTQ-RGSRRLLERKKRINLQLDFATEISKV     | -DPMFFIRLHESLNWDEKSKPS                    | -KFTLFDYEDYDQ            | -      | -DYHKKQ        | -YPTIYHLRDELI           |
| 224544332 | <i>Catenibacterium misotukai</i> DSM 15897                         | IVDYSIGLDDITGNSVGVAVT | -D-----   | MNHLIM             | -KHGHLGMSRL    | -FSNAETAA                     | NRRAS-RSIRRYNRKRRERILLRAQLQDVLKKE    | -DPTFFIRLEHSTFLDEEDKAKYLGTDYKYNLFDIFDFNDY | -                        | -      | -TYHKQ         | -YPTIYHLRDELI           |
| 34279809  | <i>Streptococcus mitis</i> UA159                                   | MGRVLGLDVGTSVGVAVT    | -D-----   | TDYVKDPARKMKVLQNTK | -SRHKLHLGMSRL  | -FDSGNVTAE                    | DRLLK-RTARRRYRTRRRNLRLVQLQEIFSEIMKI  | -DPMFFIRLHESSLWLDKSNKSE                   | -RHPIDFGNEEYD            | -      | -KYHEM         | -YPTIYHLRDELI           |
| 310786728 | <i>Streptococcus pyogenes</i> 5870                                 | KYSLVGLDVGTSVGVAVT    | -D-----   | TDYKVA             | -SRHKLHLGMSRL  | -FDSGNVTAE                    | DRLLK-RTARRRYRTRRRNLRLVQLQEIFSEIMKI  | -DPMFFIRLHESSLWLDKSNKSE                   | -RHPIDFGNEEYD            | -      | -KYHEM         | -YPTIYHLRDELI           |
| 16018105  | <i>Listeria innocua</i> Clijf11262                                 | KQYFVLGLDVGTSVGVAVT   | -D-----   | TDYKVA             | -KFKHSHKMGMSRL | -FDSGNVTAE                    | DRLLK-RTARRRYRTRRRNLRLVQLQEIFSEIMKI  | -DPMFFIRLHESSLWLDKSNKSE                   | -RHPIDFGNEEYD            | -      | -KYHEM         | -YPTIYHLRDELI           |
| 116628213 | <i>Streptococcus thermophilus</i> LMD-9                            | TKPYSIGLDDITGNSVGVAVT | -D-----   | TDNYVSKMVKLGNTSK   | -KHKIKNKLGVLL  | -FDSGITAE                     | GRLLK-RTARRRYRTRRRNLRLVQLQEIFSEIMKI  | -DPMFFIRLHESSLWLDKSNKSE                   | -RHPIDFGNEEYD            | -      | -KYHEM         | -YPTIYHLRDELI           |
| 323463801 | <i>Staphylococcus pseudintermedius</i> E99                         | RKPYLGLDVGTSVGVAVT    | -D-----   | DKGFNVLL           | -KYHKKDLGVLL   | -FDGALTAQ                     | EREQF-RTSRRRNRKRIRKLLGLLQELLPALVQ    | -NPNFY-OFQCFRLLKSNNDMDVF                  | -KNKLSLENDVSLF           | -      | -GYESKQ        | -YPTIYHLRDELI           |
| 252684361 | <i>Acidimicrococcus intestini</i> RY-CR-M95                        | GKMYVILGLDVGTSVGVAVT  | -D-----   | SVYHLL             | -KFKGKMGMSRL   | -FVAGNQA                      | ERSRF-RTSRRRNRKRIRKLLGLLQELLPALVQ    | -NPNFY-OFQCFRLLKSNNDMDVF                  | -KNKLSLENDVSLF           | -      | -EYVSD         | -YPTIYHLRDELI           |
| 320326020 | <i>Olsenella uli</i> DSM 7084                                      | TDEYVILGLDVGTSVGVAVT  | -D-----   | DKAGAIL            | -KFKGKMGMSRL   | -FDAQGTAA                     | GARIH-RSQRRYVRVRRVLDLQLSLQDVEVSKV    | -DFFCFRLLKSNNDMDVF                        | -DYTWPIFNDSPFNEV         | -      | -DYTKKQ        | -YPTIYHLRDELI           |
| 366983953 | <i>Oenococcus oeni</i> DSM 17330                                   | ARDYVGLDVGTSVGVAVT    | -D-----   | DMKVTAE            | -RHSHKLHLGMSRL | -FDSVTAE                      | KRRTY-RTTRRRSLRHHVRLRLNDLDFAGPLTD    | PGDFNEFLARLKYSVWHPDQSNQAHF                | -GFFLVDFNEEYD            | -      | -KYHEM         | -YPTIYHLRDELI           |
| 258190199 | <i>Bifidobacterium bifidum</i> S17                                 | VYRVLGLDVGTSVGVAVT    | -D-----   | DNVRLV             | -RAKHLGLGMSRL  | -FDDACTAE                     | SRMAH-RTTRRRSLRHHVRLRLNDLDFAGPLTD    | PGDFNEFLARLKYSVWHPDQSNQAHF                | -GFFLVDFNEEYD            | -      | -KYHEM         | -YPTIYHLRDELI           |
| 259509199 | <i>Lactobacillus rhamnosus</i> GJ                                  | NQPYVGLDVGTSVGVAVT    | -D-----   | ANGSHL             | -RLKGTATIGARR  | -FRDQSA                       | DRRIS-RTTRRRSLRHHVRLRLNDLDFAGPLTD    | PGDFNEFLARLKYSVWHPDQSNQAHF                | -GFFLVDFNEEYD            | -      | -KYHEM         | -YPTIYHLRDELI           |
| 300361537 | <i>Lactobacillus gasseri</i> JV-003                                | KMEYVGLDVGTSVGVAVT    | -D-----   | FQNTLL             | -MHGKATIGASHL  | -FDAGNSAA                     | DRRAF-RTTRRRSLRHHVRLRLNDLDFAGPLTD    | PGDFNEFLARLKYSVWHPDQSNQAHF                | -GFFLVDFNEEYD            | -      | -KYHEM         | -YPTIYHLRDELI           |
| 169823755 | <i>Finegoldia magna</i> ATCC 29328                                 | EKKYVILGLDVGTSVGVAVT  | -D-----   | EFYNL              | -RAKGLDVGMSRL  | -FEKADTAA                     | NTRIF-RSGRRNRKRIRKLLGLLQELLPALVQ     | -NPNFY-OFQCFRLLKSNNDMDVF                  | -KNKLSLENDVSLF           | -      | -GYESKQ        | -YPTIYHLRDELI           |
| 47958868  | <i>Mycoplasma mobile</i> 163K                                      | NKVVILGLDVGTSVGVAVT   | -D-----   | ISQKED             | -NKFPILHGVLL   | -FVTDGSD-DK                   | LNINTRFKK-QGRRNRRLTRKRDPIKYLIDN      | -NIL-ELFEDPKPKLVLRNLEKY                   | -NPNFY-OFQCFRLLKSNNDMDVF | -      | -EYVSD         | -YPTIYHLRDELI           |
| 284931710 | <i>Mycoplasma gallisepticum</i> str. F                             | KPEVTLGLDVGTSVGVAVT   | -D-----   | ETNI               | -LHLLGMSRL     | -FSQAQTA                      | DRRSF-RSIRRYNRKRRERILLRAQLQDVLKKE    | -DPTFFIRLEHSTFLDEEDKAKYLGTDYKYNLFDIFDFNDY | -                        | -      | -EYVSD         | -YPTIYHLRDELI           |
| 363542550 | <i>Mycoplasma ovipneumoniae</i> SC01                               | KNNITVGLDVGTSVGVAVT   | -D-----   | DS                 | -TTMGLDGTFRF   | -FERETAN                      | ERRAF-RTTRRRSLRHHVRLRLNDLDFAGPLTD    | PGDFNEFLARLKYSVWHPDQSNQAHF                | -GFFLVDFNEEYD            | -      | -KYHEM         | -YPTIYHLRDELI           |
| 394393286 | <i>Bifidobacterium bifidum</i> S17                                 | VYRVLGLDVGTSVGVAVT    | -D-----   | DNVRLV             | -RAKHLGLGMSRL  | -FDDACTAE                     | SRMAH-RTTRRRSLRHHVRLRLNDLDFAGPLTD    | PGDFNEFLARLKYSVWHPDQSNQAHF                | -GFFLVDFNEEYD            | -      | -KYHEM         | -YPTIYHLRDELI           |
| 71894592  | <i>Mycoplasma synoviae</i> 53                                      | KEKIVLGLDVGTSVGVAVT   | -D-----   | NA                 | -ETKEVIDLGRV   | -FSEPKAD                      | YBARK-RTTRRRSLRHHVRLRLNDLDFAGPLTD    | PGDFNEFLARLKYSVWHPDQSNQAHF                | -GFFLVDFNEEYD            | -      | -KYHEM         | -YPTIYHLRDELI           |
| 28924075  | <i>Eubacterium rectale</i> ATCC 33656                              | FMKYLLGLDVGTSVGVAVT   | -D-----   | DK                 | -ESTVEIAGSNI   | -FPEASAAD-NQ                  | LRDM-RGAKNNRRKLRTRINDPIKLWENN        | -                                         | -K-STEVILKLVRAI          | -      | -EYVSD         | -YPTIYHLRDELI           |
| 116627542 | <i>Streptococcus thermophilus</i> LMD-9                            | MSDLVGLDVGTSVGVAVT    | -D-----   | NK                 | -VIGEIHKNSRI   | -FPAQAEN-NL                   | VRTIN-QGRRLLARLKRHRVRLNRLKFEES       | -                                         | -GLIT                    | -      | -DFTKSI        | -NPNYQYLVKGL            |
| 315149830 | <i>Enterococcus faecalis</i> TK0012                                | MYSIIGLDDITGNSVGVAVT  | -D-----   | RTGN               | -VDLGRV        | -FSAKNSK-NL                   | ERTIN-RGRRLLRKRTRNLKDKAKILA          | -                                         | -GLIT                    | -      | -NPNYQYLVKGL   | -NPNYQYLVKGL            |
| 315659848 | <i>Staphylococcus lugdunensis</i> M23590                           | NQKFLGLDVGTSVGVAVT    | -D-----   | ETNI               | -LHLLGMSRL     | -FPEANVEN-NK                  | GRRSK-RSIRRYNRKRRERILLRAQLQDVLKKE    | -DPTFFIRLEHSTFLDEEDKAKYLGTDYKYNLFDIFDFNDY | -                        | -      | -SOPQ          | -STNYPYLVKGL            |
| 160915782 | <i>Eubacterium dolichum</i> DSM 3991                               | MGRVLGLDVGTSVGVAVT    | -D-----   | TDYVKDPARKMKVLQNTK | -SRHKLHLGMSRL  | -FDSGNVTAE                    | DRLLK-RTARRRYRTRRRNLRLVQLQEIFSEIMKI  | -DPMFFIRLHESSLWLDKSNKSE                   | -RHPIDFGNEEYD            | -      | -KYHEM         | -YPTIYHLRDELI           |
| 339393381 | <i>Lactobacillus coryniformis</i> subsp. <i>torquens</i> KCTC 3535 | MGRVLGLDVGTSVGVAVT    | -D-----   | TDYVKDPARKMKVLQNTK | -SRHKLHLGMSRL  | -FDSGNVTAE                    | DRLLK-RTARRRYRTRRRNLRLVQLQEIFSEIMKI  | -DPMFFIRLHESSLWLDKSNKSE                   | -RHPIDFGNEEYD            | -      | -KYHEM         | -YPTIYHLRDELI           |
| 10780384  | <i>Lycobacterium minutus</i> DSM 2926                              | MYSIIGLDDITGNSVGVAVT  | -D-----   | NK                 | -VIGEIHKNSRI   | -FPAQAEN-NL                   | VRTIN-QGRRLLARLKRHRVRLNRLKFEES       | -                                         | -GLIT                    | -      | -NPNYQYLVKGL   | -NPNYQYLVKGL            |
| 325677756 | <i>Ruminococcus albus</i> 8                                        | MYSIIGLDDITGNSVGVAVT  | -D-----   | RTGN               | -VDLGRV        | -FSAKNSK-NL                   | ERTIN-RGRRLLRKRTRNLKDKAKILA          | -                                         | -GLIT                    | -      | -NPNYQYLVKGL   | -NPNYQYLVKGL            |
| 187736489 | <i>Akkermansia muciniphila</i> ATCC BAA-835                        | SRLTSFSSFDIGSISGVAI   | -A-----   | ASASHDD            | -ADPSVCGGCTV   | -FPKDDCAA                     | PKREY-RLLRNIRSRVRIERIGRLLVQA         | -                                         | -GLIT                    | -      | -KETSQ         | -HPAFFYLAELAL           |
| 117929158 | <i>Acidothermus cellulolyticus</i> 11B                             | PVTRVGLDVGTSVGVAVT    | -D-----   | EVSDEN             | -SPVRLNLAQSVI  | -HDGQVDE-RS                   | GASRLALRGMARRARLRFRARRLDLMLGSEL      | -                                         | -GWTPV-PQNTVSP           | -      | -VDVWLARKKLA   | -VDVWLARKKLA            |
| 189440764 | <i>Bifidobacterium longum</i> DJ010A                               | GKRYVIGLDDITGNSVGVAVT | -D-----   | EVSDEN             | -SPVRLNLAQSVI  | -HDGQVDE-RS                   | GASRLALRGMARRARLRFRARRLDLMLGSEL      | -                                         | -GWTPV-PQNTVSP           | -      | -VDVWLARKKLA   | -VDVWLARKKLA            |
| 283451339 | <i>Bifidobacterium dentium</i> Bd1                                 | VYRVLGLDVGTSVGVAVT    | -D-----   | DNVRLV             | -RAKHLGLGMSRL  | -FDDACTAE                     | SRMAH-RTTRRRSLRHHVRLRLNDLDFAGPLTD    | PGDFNEFLARLKYSVWHPDQSNQAHF                | -GFFLVDFNEEYD            | -      | -KYHEM         | -YPTIYHLRDELI           |
| 32632678  | <i>Corynebacterium hirtchiae</i> NCTC 13129                        | DKPYVILGLDVGTSVGVAVT  | -D-----   | NDDGNV             | -LPEIKIMVGRV   | -FKASAGAA                     | DRKLS-RGQRNNHRVTRRMVRLKVAQG-KL       | -                                         | -ALPVPADLRKKN            | -      | -SSEGE         | -TSAKRFLDGVV-LQNDYLVKGL |
| 187520660 | <i>Eluimicrobium minutum</i> Tel191                                | MKKVILGVDLIGTISGVAVT  | -D-----   | QGK                | -VTRCLDMSVVM   | -RNNPILYDEK-SG                | SSQSIITRNL-KMRRLLERKKRRCVCAVPTG      | -                                         | -MLSY                    | -      | -KPNND         | -KNRWOLRAVDA            |
| 319957206 | <i>Nitratifractor salinus</i> DSM 16511                            | SRPYSIGLDDITGNSVGVAVT | -A-----   | ADPSVCGGCTV        | -FPKDDCAA      | -PKREY-RLLRNIRSRVRIERIGRLLVQA | -                                    | -GLIT                                     | -                        | -      | -EDAVV         | -RANPYELARKGL           |
| 325972003 | <i>Sphaerochaeta globus</i> str. <i>Buddy</i>                      | MKKVILGVDLIGTISGVAVT  | -D-----   | QGK                | -VTRCLDMSVVM   | -RNNPILYDEK-SG                | SSQSIITRNL-KMRRLLERKKRRCVCAVPTG      | -                                         | -MLSY                    | -      | -KPNND         | -KNRWOLRAVDA            |
| 261414553 | <i>Fibrobacter succinogenes</i> subsp. <i>succinogenes</i> S85     | MKRLLGLDVGTSVGVAVT    | -D-----   | EVSDEN             | -SPVRLNLAQSVI  | -HDGQVDE-RS                   | GASRLALRGMARRARLRFRARRLDLMLGSEL      | -                                         | -GWTPV-PQNTVSP           | -      | -VDVWLARKKLA   | -VDVWLARKKLA            |
| 60683389  | <i>Bacteroides fragilis</i> NCTC 9343                              | MKRLLGLDVGTSVGVAVT    | -D-----   | EVSDEN             | -SPVRLNLAQSVI  | -HDGQVDE-RS                   | GASRLALRGMARRARLRFRARRLDLMLGSEL      | -                                         | -GWTPV-PQNTVSP           | -      | -VDVWLARKKLA   | -VDVWLARKKLA            |
| 256819408 | <i>Capnocytophaga ochracea</i> DSM 7271                            | MKRLLGLDVGTSVGVAVT    | -D-----   | EVSDEN             | -SPVRLNLAQSVI  | -HDGQVDE-RS                   | GASRLALRGMARRARLRFRARRLDLMLGSEL      | -                                         | -GWTPV-PQNTVSP           | -      | -VDVWLARKKLA   | -VDVWLARKKLA            |
| 90425961  | <i>Rhodospseudomonas palustris</i> B1S18                           | MKQVFLGDDITGNSVGVAVT  | -D-----   | ETNI               | -LHLLGMSRL     | -FPEANVEN-NK                  | GRRSK-RSIRRYNRKRRERILLRAQLQDVLKKE    | -DPTFFIRLEHSTFLDEEDKAKYLGTDYKYNLFDIFDFNDY | -                        | -      | -EYVSD         | -YPTIYHLRDELI           |
| 373501184 | <i>Prevotella nana</i> F0438                                       | MKQVFLGDDITGNSVGVAVT  | -D-----   | ETNI               | -LHLLGMSRL     | -FPEANVEN-NK                  | GRRSK-RSIRRYNRKRRERILLRAQLQDVLKKE    | -DPTFFIRLEHSTFLDEEDKAKYLGTDYKYNLFDIFDFNDY | -                        | -      | -EYVSD         | -YPTIYHLRDELI           |
| 294674019 | <i>Prevotella ruminicola</i> 23                                    | MKRLLGLDVGTSVGVAVT    | -D-----   | EVSDEN             | -SPVRLNLAQSVI  | -HDGQVDE-RS                   | GASRLALRGMARRARLRFRARRLDLMLGSEL      | -                                         | -GWTPV-PQNTVSP           | -      | -VDVWLARKKLA   | -VDVWLARKKLA            |
| 365959402 | <i>Flavobacterium columnare</i> ATCC 49512                         | MKRLLGLDVGTSVGVAVT    | -D-----   | EVSDEN             | -SPVRLNLAQSVI  | -HDGQVDE-RS                   | GASRLALRGMARRARLRFRARRLDLMLGSEL      | -                                         | -GWTPV-PQNTVSP           | -      | -VDVWLARKKLA   | -VDVWLARKKLA            |
| 12879015  | <i>Aminomonas paucivorans</i> DSM 12260                            | MKRLLGLDVGTSVGVAVT    | -D-----   | EVSDEN             | -SPVRLNLAQSVI  | -HDGQVDE-RS                   | GASRLALRGMARRARLRFRARRLDLMLGSEL      | -                                         | -GWTPV-PQNTVSP           | -      | -VDVWLARKKLA   | -VDVWLARKKLA            |
| 83591793  | <i>Rhodospirillum rubrum</i> ATCC 11170                            | IEPVLGLDVGTSVGVAVT    | -D-----   | EVSDEN             | -SPVRLNLAQSVI  | -HDGQVDE-RS                   | GASRLALRGMARRARLRFRARRLDLMLGSEL      | -                                         | -GWTPV-PQNTVSP           | -      | -VDVWLARKKLA   | -VDVWLARKKLA            |
| 294086111 | <i>Candidatus Puniceispirillum marinum</i> TMCC1322                | MKRLLGLDVGTSVGVAVT    | -D-----   | EVSDEN             | -SPVRLNLAQSVI  | -HDGQVDE-RS                   | GASRLALRGMARRARLRFRARRLDLMLGSEL      | -                                         | -GWTPV-PQNTVSP           | -      | -VDVWLARKKLA   | -VDVWLARKKLA            |
| 121609211 | <i>Verminephrobacter venetae</i> EFO1-2                            | AVYVFLGDDITGNSVGVAVT  | -D-----   | RIMEAR             | -EPATILGMSRL   | -FDRGMA                       | NS-EPAVLGRVVA-RAMRRDRRDLRKRKMHQVLQVH | -                                         | -                        | -      | -E-RLNYPQLRAGL | -E-RLNYPQLRAGL          |
| 344171927 | <i>Ralstonia sisygyii</i> R24                                      | MRLLGLDVGTSVGVAVT     | -D-----   | EVSDEN             | -SPVRLNLAQSVI  | -HDGQVDE-RS                   | GASRLALRGMARRARLRFRARRLDLMLGSEL      | -                                         | -GWTPV-PQNTVSP           | -      | -VDVWLARKKLA   | -VDVWLARKKLA            |
| 159042956 | <i>Nitrososphaera shibae</i> DFU 12                                | VQYVFLSFLDITGNSVGVAVT | -D-----   | NLDKQ              | -KPRETRALGMSRL | -FSDGRDQ-DK                   | ASLAVARLRA-RQMRRRDRYVTRTRMGLMGLVAVT  | -                                         | -                        | -      | -EVA           | -VDYPYLRERAKT           |
| 288957741 | <i>Azoaspirillum</i> sp- B510                                      | SVLYRGLDVGTSVGVAVT    | -HLE----- | KRGRDH             | -EPVALGPGGVRI  | -FPDGRDQ-SG                   | TSNAVARRA-RGAKRRDRYVTRTRMGLMGLVAVT   | -                                         | -                        | -      | -EVA           | -VDYPYLRERAKT           |
| 92109262  | <i>Nitrobacter hamburgensis</i> X14                                | LRAYRGLDVGTSVGVAVT    | -WLD----- | DHG                | -QPEGLPGGVRI   | -FPDGRDQ-SK                   | QSNAAAGRLA-RSARRDRYVTRTRMGLMGLVAVT   | -                                         | -                        | -      | -EVA           | -VDYPYLRERAKT           |
| 148255343 | <i>Bradyrhizobium</i> sp. <i>BTAi1</i>                             | MKRLLGLDVGTSVGVAVT    | -D-----   | EVSDEN             | -SPVRLNLAQSVI  | -HDGQVDE-RS                   | GASRLALRGMARRARLRFRARRLDLMLGSEL      | -                                         | -GWTPV-PQNTVSP           | -      | -VDVWLARKKLA   | -VDVWLARKKLA            |
| 34557790  | <i>Wolinella succinogenes</i> DSM 1740                             | MKRLLGLDVGTSVGVAVT    | -D-----   | EVSDEN             | -SPVRLNLAQSVI  | -HDGQVDE-RS                   | GASRLALRGMARRARLRFRARRLDLMLGSEL      | -                                         | -GWTPV-PQNTVSP           | -      | -VDVWLARKKLA   | -VDVWLARKKLA            |
| 220930482 | <i>Clostridium cellulolyticum</i> H10                              | MKRLLGLDVGTSVGVAVT    | -D-----   | EVSDEN             | -SPVRLNLAQSVI  | -HDGQVDE-RS                   | GASRLALRGMARRARLRFRARRLDLMLGSEL      | -                                         | -GWTPV-PQNTVSP           | -      | -VDVWLARKKLA   | -VDVWLARKKLA            |
| 154250555 | <i>Parvibaculum lavamentivorans</i> DS-1                           | MKRLLGLDVGTSVGVAVT    | -D-----   | EVSDEN             | -SPVRLNLAQSVI  | -HDGQVDE-RS                   | GASRLALRGMARRARLRFRARRLDLMLGSEL      | -                                         | -GWTPV-PQNTVSP           | -      | -VDVWLARKKLA   | -VDVWLARKKLA            |
| 257413184 | <i>Roseburia intestinalis</i> LI-82                                | KMYVILGLDVGTSVGVAVT   | -D-----   | EVSDEN             | -SPVRLNLAQSVI  | -HDGQVDE-RS                   | GASRLALRGMARRARLRFRARRLDLMLGSEL      | -                                         | -GWTPV-PQNTVSP           | -      | -VDVWLARKKLA   | -VDVWLARKKLA            |
| 218767588 | <i>Neisseria meningitidis</i> 22941                                | MNYDILGDDITGNSVGVAVT  | -D-----   | EVSDEN             | -SPVRLNLAQSVI  | -HDGQVDE-RS                   | GASRLALRGMARRARLRFRARRLDLMLGSEL      | -                                         | -GWTPV-PQNTVSP           | -      | -VDVWLARKKLA   | -VDVWLARKKLA            |
| 222109285 | <i>Acidovorax eboursii</i> TSPY                                    | MAQVFLGDDITGNSVGVAVT  | -D-----   | EVSDEN             | -SPVRLNLAQSVI  | -HDGQVDE-RS                   | GASRLALRGMARRARLRFRARRLDLMLGSEL      | -                                         | -GWTPV-PQNTVSP           | -      | -VDVWLARKKLA   | -VDVWLARKKLA            |
| 189485225 | uncultured <i>Termite</i> group 1 bacterium phylotype Rad17        | MKRLLGLDVGTSVGVAVT    | -D-----   | EVSDEN             | -SPVRLNLAQSVI  | -HDGQVDE-RS                   | GASRLALRGMARRARLRFRARRLDLMLGSEL      | -                                         | -GWTPV-PQNTVSP           | -      | -VDVWLARKKLA   | -VDVWLARKKLA            |
| 186264245 | <i>Clostridium perfringens</i> D str. <i>JGS1721</i>               | DINYVGLDVGTSVGVAVT    | -D-----   | EVSDEN             | -SPVRLNLAQSVI  | -HDGQVDE-RS                   | GASRLALRGMARRARLRFRARRLDLMLGSEL      | -                                         | -GWTPV-PQNTVSP           | -      | -VDVWLARKKLA   | -VDVWLARKKLA            |
| 220930482 | <i>Clostridium cellulolyticum</i> H10                              | MKRLLGLDVGTSVGVAVT    | -D-----   | EVSDEN             | -SPVRLNLAQSVI  | -HDGQVDE-RS                   | GASRLALRGMARRARLRFRARRLDLMLGSEL      | -                                         | -GWTPV-PQNTVSP           | -      | -VDVWLARKKLA   | -VDVWLARKKLA            |
| 154250555 | <i>Parvibaculum lavamentivorans</i> DS-1                           | MKRLLGLDVGTSVGVAVT    | -D-----   | EVSDEN             | -SPVRLNLAQSVI  | -HDGQVDE-RS                   | GASRLALRGMARRARLRFRARRLDLMLGSEL      | -                                         | -GWTPV-PQNTVSP           | -      | -VDVWLARKKLA   | -VDVWLARKKLA            |
| 257413184 | <i>Roseburia intestinalis</i> LI-82                                | KMYVILGLDVGTSVGVAVT   |           |                    |                |                               |                                      |                                           |                          |        |                |                         |

|           |                                                                    |                                                                                                                                                                                     |                         |       |                                                                        |
|-----------|--------------------------------------------------------------------|-------------------------------------------------------------------------------------------------------------------------------------------------------------------------------------|-------------------------|-------|------------------------------------------------------------------------|
| 303229466 | <i>Veillonella atypica</i> ACS-134-V-Col7a                         | :- --MENGDDI----                                                                                                                                                                    | RKLFVAVHHLLKYGKRNFLYEGA | ----- | TFNSNAF--TFEDVLQALVNI TFNCFDTNSAISISINILMESGKTKSKAKAIERLVDVYTFVDEV     |
| 34762592  | <i>Fusobacterium nucleatum</i> subsp. <i>vincentii</i> ATCC 49256  | :- --KNPEKDI----                                                                                                                                                                    | RLYLALHSIFPKRGHFL       | ----- | -----PEGQNLKEIKNFTLYNNLISFLIEDNGINKSIDKNDILEKELICDSGKGLKDKKFKGIFPN     |
| 374307738 | <i>Fillofacter alocis</i> ATCC 35996                               | :- --EETKQDI----                                                                                                                                                                    | RLYLALHSIIKTRGHFL       | ----- | -----LDGLQSAKQLRFLDITPFLSLQEQKNSVYLSLSEKQKDYFELKRNISIAKSERKVKLNLPFE    |
| 320529778 | <i>Solobacterium moorii</i> G0204                                  | :- --RNSFHHI----                                                                                                                                                                    | RLVFLAHLHLKYRGHFI       | ----- | -----YINSANGOVYTSDEAVSDPEYLYNENDFEPINLENKKEFVNLKDLHLTKKEKIKSLKIKYDI    |
| 291520705 | <i>Coprococcus catus</i> GD-7                                      | :- --ETTEPDI----                                                                                                                                                                    | RLVYLVLHMHMRGHFL        | ----- | -----LQSD--ISOIKFKFTFQLIQNIQDEELEWHLSLDDAAQFVEVHLKDRNLTRSTKSKLTKQ      |
| 42525843  | <i>Treponema denticola</i> ATCC 35405                              | :- --ENKVKPPD----                                                                                                                                                                   | RLLYLACHNI IKKRGHFL     | ----- | -----FGFDENSENQTFTIQALFEYLREDEWEDDANSQVKILKDSLSKNSKQSKRNKILGLKPK       |
| 304438954 | <i>Pectoniphilus duerdenii</i> ATCC BAA-1640                       | :- --EDEGKDI----                                                                                                                                                                    | RLLYLACHYLLKNGRHFIPEGQ  | ----- | -----KFDTKNSFDKSIDNLIKHLRDEYNIDLEFNNEIDLITTTTLMTKNKKELKNIVGDTKFLKAIIS  |
| 224543312 | <i>Catenibacterium Mitsouaki</i> DSM 15897                         | :- --ESTEKADD----                                                                                                                                                                   | RLLYLALHLIKYRGNFLEYEQ   | ----- | -----KFNMDASNIEEDKLSIDIFQPTSFNNIPEDEDEKNLELILEILKPLSKAKVDEVMTLIAPEKDYK |
| 24379809  | <i>Streptococcus kitaharae</i> DSM 17330                           | :- --DNPKEVDL----                                                                                                                                                                   | RLVYLALAHIIKPRGHFLIE    | ----- | -----GRKDFTRNDVRFQFQFPLAVYDNTFENSS-----LQEQN-----VOVBEIITD-KIKSKAK     |
| 15765041  | <i>Streptococcus pyogenes</i> 5370                                 | :- --DSTKCADL----                                                                                                                                                                   | RLVFLALAHIIKRGNFLEI     | ----- | -----GDLNFGNSGDKLFLTQLVCTNQNLFGP-----TRNSG-----VDKALVLA--RLSKRFR       |
| 16011805  | <i>Gallibacterium anatum</i> DSM 11262                             | :- --NSSEKADL----                                                                                                                                                                   | RLVFLALAHIIKRGNFLEI     | ----- | -----GALDTQNTVTSDEAVSDPEYLYNENDFEPINLENKKEFVNLKDLHLTKKEKIKSLKIKYDI     |
| 116628213 | <i>Streptococcus thermophilus</i> LMD-9                            | :- --DSTKCADL----                                                                                                                                                                   | RLVFLALAHIIKRGNFLEI     | ----- | -----GFNSKNNDIQKNFQDFLDYNAIFESDL-----SLENS-----KQEBEIKVD-KISKLEK       |
| 323463801 | <i>Staphylococcus pseudintermedius</i> ED99                        | :- --LKEKDFPD----                                                                                                                                                                   | ELLYMALYHLVYKRGHFLFD    | ----- | -----HLKIENLTNNDMHDVFEVLIETYENNNIKL-----NLDYEKT-KVIIEYIKDNTMTNDR       |
| 252648361 | <i>Acidaminococcus intestini</i> RY-CR-M95                         | :- --ESSEKDDP----                                                                                                                                                                   | RLVFLAVLHVLRHGHFLNEI    | ----- | -----VDKDNIGDVLSEFDAPYFPELAFLESDNG-----VSPWVCSKALQATLLS-RNSVNDK        |
| 302326020 | <i>Olsonella uli</i> DSM 7084                                      | :- --ETDEKADI----                                                                                                                                                                   | RLVYLATHNIKVRHGNFLRE    | ----- | -----NNSKLSRSDANFAQAVKSLRLALNDCSEDEYCAWKGEDGDAIDEALINVLADGEKGRSDQ      |
| 369839953 | <i>Oenococcus oeni</i> DSM 17330                                   | :- --NDQPKHDL----                                                                                                                                                                   | REVLATHHLVYKRGHFLIE     | ----- | -----GQVKAADFVHTFTADAIQRYVBSNNSDE-----NLLKGIDKLEKSAALTDKHSKSOR         |
| 312067728 | <i>Bifidobacterium bifidum</i> S17                                 | :- --EDDSQDDI----                                                                                                                                                                   | REVLATHHMKYKRGNFLEI     | ----- | -----LSSNAFKEDLEKLLKRLTRVEMSESGQNSIDEGQDENKLVAPANQALALAKTRGSSSRVTR     |
| 259509199 | <i>Lactobacillus rhamnosus</i> GG                                  | :- --THTKADPD----                                                                                                                                                                   | REIFLAHTHLIKSRGHFTPGA   | ----- | -----AKDNFTKVDLEIDIFFALTRVAQYVPDLEITFDLAKADDFKALLDQATPSTDTQKALVNLLSSE  |
| 300361537 | <i>Lactobacillus thermophilus</i> JV-V03                           | :- --SEDKFDLD----                                                                                                                                                                   | REYFLAHHIIVKYRGNFLYNTP  | ----- | -----VKDFEASKIDVKSLEKNELYELRDSFTVDESNLSALBIEKIRIDRCKVFKINKVKSIIHLLSLK  |
| 169823755 | <i>Finexgoldia magna</i> ATCC 29328                                | :- --EETHGVDDI----                                                                                                                                                                  | RYYFLAINQMKRHRGHFLIDQG  | ----- | -----ISHVTDKPKLEQLLINDLKLLEBELMESDIFEVLADVNEKRTDKNNKELIKQDFNKQEG       |
| 47458868  | <i>Mycoplasma mobile</i> 163K                                      | :- --NEKYKLDK----                                                                                                                                                                   | SELVLYLFLYSLRGAFF       | ----- | -----DNPE-----                                                         |
| 284931710 | <i>Mycoplasma gallisepticum</i> str. F                             | :- --NAKIDP----                                                                                                                                                                     | KALSWILHDVLYKNGHFYE     | ----- | -----                                                                  |
| 363542550 | <i>Mycoplasma ovipneumoniae</i> SC01                               | :- --DSKIEK----                                                                                                                                                                     | LDLWILHDLVLENGGFVVD     | ----- | -----                                                                  |
| 394303286 | <i>Mycoplasma agalactiae</i> PG 14                                 | :- --GGRLVQEP----                                                                                                                                                                   | DELATWLHDLVLYKNGHFVDT   | ----- | -----                                                                  |
| 71894592  | <i>Mycoplasma synoviae</i> 53                                      | :- --KEEIKP----                                                                                                                                                                     | SELVWILRDLVLYKNGGFVY    | ----- | -----KN-----                                                           |
| 238924075 | <i>Eubacterium rectale</i> ATCC 33656                              | :- --TEBITL----                                                                                                                                                                     | DELVLYLVLKSRGHFI        | ----- | -----LEDALDDT-----                                                     |
| 116627542 | <i>Streptococcus thermophilus</i> LMD-9                            | :- --TDBLSN----                                                                                                                                                                     | EELFIALKNMVKHGRGISY     | ----- | -----LDDAS-----                                                        |
| 315149830 | <i>Enterococcus faecalis</i> TX0012                                | :- --TEPLSR----                                                                                                                                                                     | GEIYKVTLHLLKRGISY       | ----- | -----LDEV-----                                                         |
| 315659848 | <i>Staphylococcus lugdunensis</i> M23590                           | :- --SEALSK----                                                                                                                                                                     | DELVIALHLIAKRRGIHK      | ----- | -----LDVIDS-----                                                       |
| 160915782 | <i>Eubacterium dolichum</i> DSM 3991                               | :- --NERLNG----                                                                                                                                                                     | EELATLHLCKHGRGISY       | ----- | -----ETIIDEAK-----                                                     |
| 336393381 | <i>Lactobacillus coryniformis</i> subsp. <i>torquens</i> KCTC 3535 | :- --DRRLTL----                                                                                                                                                                     | SELVFLVYHFKHGRGFSD      | ----- | -----NRRKALMP-----                                                     |
| 310780384 | <i>Lytobacter polytocos</i> DSM 2926                               | :- --EAKISN----                                                                                                                                                                     | KETAIQLLHLIAKRRGFKS     | ----- | -----FKRTDR-----                                                       |
| 325677756 | <i>Ruminococcus albus</i> 8                                        | :- --SEKILP----                                                                                                                                                                     | EETIACLIHCNRRGYK        | ----- | -----FYEYVVEDIED-----                                                  |
| 187736489 | <i>Akkermansia muciniphila</i> ATCC BAA-835                        | :- --KGHRTLAP----                                                                                                                                                                   | IELHVLRWYAHNRGYDN       | ----- | -----NASWSNSL-----                                                     |
| 117929158 | <i>Acidothermus cellulolyticus</i> 11B                             | :- --EYVVDELTERR-----                                                                                                                                                               | RLLYGAVSHMARHRGNPWT     | ----- | -----IKDLKNLPOP-----                                                   |
| 189440764 | <i>Bifidobacterium longum</i> DJO10A                               | :- --TRYIETTELR-----                                                                                                                                                                | ESISIALRHMARHRGNRN      | ----- | -----PYQVDSLSIDNYP-----                                                |
| 283456135 | <i>Bifidobacterium dentium</i> Bd1                                 | :- --SSYIQDETTR-----                                                                                                                                                                | EVSAIARHIAHRGNRPYMS     | ----- | -----VESLFDVAP-----                                                    |
| 38232678  | <i>Corynebacterium urethrae</i> NCTC 13129                         | :- --NVTADKDEKRG-----                                                                                                                                                               | EKLSVALRHAHRRGNPFK      | ----- | -----VSSLYIPOP-----                                                    |
| 187250660 | <i>Elusimicrobium minutum</i> Bel191                               | :- --DERLSL-----                                                                                                                                                                    | QLGQVLYHIAHGRGSSA       | ----- | -----LTFTEENSE-----                                                    |
| 319957206 | <i>Nitratifactor saluginis</i> DSM 16511                           | :- --KRPLSP-----                                                                                                                                                                    | QELFALPAHMAKHRRGYK      | ----- | -----DLIYELLELGLNDRPEK-----                                            |
| 325972003 | <i>Sphaerochaeta globus</i> str. Buddy                             | :- --NEQLTL-----                                                                                                                                                                    | SELGYALYHIAHRRGSSS      | ----- | -----VTFIIDEK-----                                                     |
| 261414553 | <i>Fibrobacter succinogenes</i> subsp. <i>succinogenes</i> S85     | :- --EKALSK-----                                                                                                                                                                    | EELSWILLQFMKRRGYQ       | ----- | -----LRGEEEEEQTKKIEYLAQKVVEATD-----                                    |
| 60683389  | <i>Bacteroides fragilis</i> NCTC 9343                              | :- --TEIISL-----                                                                                                                                                                    | EFARVLLMINKRRGYKS       | ----- | -----SRKAGVEEGLIDGMDIARLYNNLTPGELCQLQLDAGKFLPDFYRSDL                   |
| 256819408 | <i>Capnocytophaga ochracea</i> DSM 7271                            | :- --TERIEK-----                                                                                                                                                                    | EFARILLAINKRRGYKS       | ----- | -----SRKAKTEDEQAIDGMAIAKRLYDNLTPGQLSLQLLQKQKLLPDFYRSDL                 |
| 90425961  | <i>Rhodospseudomonas palustris</i> BisB18                          | :- --QRLLSN-----                                                                                                                                                                    | EELAVLGHIAHRRGFS        | ----- | -----NARNAGANA-----                                                    |
| 373501184 | <i>Prevotella micans</i> F0438                                     | :- --VQDFDPDQEPYKLGALYHIAHRRGPKS                                                                                                                                                    |                         |       | -----SKGETIADQEK-----                                                  |
| 294674019 | <i>Prevotella ruminicola</i> 23                                    | :- --TQKLLDSITQRFILGRALYHLNRRGFLS                                                                                                                                                   |                         |       | -----NRRKATKES-----                                                    |
| 365959402 | <i>Flavobacterium columnare</i> ATCC 49512                         | :- --KQKVTL-----                                                                                                                                                                    | FELGRALYHIAHRRGFLS      | ----- | -----NRID--QSAEVPFEEHNPQIQLNLEDDSSNLTNLEKEYIINLGIID-----               |
| 312879015 | <i>Aminomonas paucivorans</i> DSM 12260                            | :- --DRPLSF-----                                                                                                                                                                    | PEWVRLYHITKRRGFQS       | ----- | -----NRRNPVEDGQERS-----                                                |
| 83591793  | <i>Rhodospirillum rubrum</i> ATCC 11170                            | :- --SRPLAP-----                                                                                                                                                                    | DALWAALLHLAHRGFPS       | ----- | -----NRIDKREARAALKAKAPAKATAKATAPAKE-----                               |
| 294086111 | <i>Candidatus Puncicepirillum marinum</i> IMCC1322                 | :- --DEAIDP-----                                                                                                                                                                    | YEMGRATFHIAHRGFKS       | ----- | -----NRRKSA-----                                                       |
| 121608211 | <i>Verminephrobacter eisenlaei</i> EF01-2                          | :- --HEALTP-----                                                                                                                                                                    | GFARLFLHNRGPFKS         | ----- | -----NRKTDRK-----                                                      |
| 344171927 | <i>Ralstonia syzgii</i> R24                                        | :- --DQALTL-----                                                                                                                                                                    | PEFGRALFHLNRRGFQS       | ----- | -----NRKT-DRAT-----                                                    |
| 159042956 | <i>Dinoroseobacter shibae</i> DFL 12                               | :- --DEPLDL-----                                                                                                                                                                    | PHLGRALFHLNRRGFQS       | ----- | -----NRKTRDG-----                                                      |
| 288957741 | <i>Azospirillum</i> sp- B510                                       | :- --RERLPE-----                                                                                                                                                                    | FEI GRALFHLNRRGFYK      | ----- | -----VRTATKP-----                                                      |
| 92109262  | <i>Nitrobacter hamburgensis</i> X14                                | :- --TDTLPA-----                                                                                                                                                                    | HHVGRALFHLNRRGFQS       | ----- | -----NRKT-DSK-----                                                     |
| 148255343 | <i>Bradyrhizobium</i> sp- BTA11                                    | :- --DEVLPD-----                                                                                                                                                                    | HHVGRALFHLNRRGLFA       | ----- | -----NRAI-EQG-----                                                     |
| 34557790  | <i>Wolinella succinogenes</i> DSM 1740                             | :- --YRLKGG-----                                                                                                                                                                    | DELARVLHIAHRRGYK        | ----- | -----IGDDEA-----                                                       |
| 219561321 | <i>Campylobacter jejuni</i> subsp. <i>jejuni</i> NCTC 11168        | :- --NELLSK-----                                                                                                                                                                    | QDFARVLHIAHRRGYD        | ----- | -----TKKS-D-----                                                       |
| 791276265 | <i>Helicobacter mustelae</i> 12198                                 | :- --YRVLDK-----                                                                                                                                                                    | EELARVLHIAHRRGYD        | ----- | -----ITYGVE-----                                                       |
| 229113166 | <i>Bacillus cereus</i> Rock1-15                                    | :- --ERKLDN-----                                                                                                                                                                    | REFARVLIHLVQRGFOT       | ----- | -----IRKSVE-----                                                       |
| 222109285 | <i>Acidovorax ebreus</i> TPSY                                      | :- --DRLLTP-----                                                                                                                                                                    | LEWAVLIHQCKRRGFHW       | ----- | -----TSKAEBAKADS-----                                                  |
| 189485225 | uncultured Termite group 1 bacterium phylotype RaD17               | :- --DRKLTN-----                                                                                                                                                                    | EQFVVVTLHLAKRRGYKS      | ----- | -----LRK-----                                                          |
| 182624245 | <i>Clostridium perfringens</i> D str. JGS1721                      | :- --DYKLSR-----                                                                                                                                                                    | EWAKILINFCRRGFKS        | ----- | -----NRKNEAK-----                                                      |
| 220930482 | <i>Clostridium cellulolyticum</i> H10                              | :- --SRLKFP-----                                                                                                                                                                    | EYLVQVLHTIKRRGFKS       | ----- | -----NRKE-DLS-----                                                     |
| 154250555 | <i>Parvibaculum lavamentivorans</i> DS-1                           | :- --EELSAA-----                                                                                                                                                                    | YFGALYHLAQRHGFK         | ----- | -----RELESOTPD-----                                                    |
| 257413184 | <i>Roseburia intestinalis</i> LI-82                                | :- --DRKLPD-----                                                                                                                                                                    | EELAQVLLHIAHRRGFS       | ----- | -----TRK-----AETRAK-----                                               |
| 218767588 | <i>Neisseria meningitidis</i> Z2491                                | :- --DRKLPD-----                                                                                                                                                                    | LEWSAVLHLLIKRRGYLS      | ----- | -----QRKNE-GETADK-----                                                 |
| 15602992  | <i>Pasteurella multocida</i> subsp. <i>multocida</i> str. Pm70     | :- --EERLSA-----                                                                                                                                                                    | IEWGAVLHLLIKRRGYLS      | ----- | -----KRKNE-SQTNK-----                                                  |
| 319944583 | <i>Sutterella wadswothensis</i> 3 1 45B                            | :- --KRGREALSGLLKRRGYSRPNADGEDLTPLENVNRADVFAAHPAFSTYFS-----EVRSLAEQWEEFTANIS-----NVEKFL-----GDPNIPA-----DKEF-----IEFAVAGLID-----                                                    |                         |       |                                                                        |
| 254447899 | <i>gamma proteobacterium</i> HTCC5015                              | :- --EPLKFPINGLLNRGYTYI-----SEEVDESMNVSPLPFSEMPDDYFN-----SSAPLLEQLAKLLSDKN-----KLVRFV-----AEGKIPS-----NKNEF-----KIL-LDTALDGKY-----                                                  |                         |       |                                                                        |
| 54296138  | <i>Legionella pneumophila</i> str. Paris                           | :- --ARETALCHYLNRRGYTYVTPD-LDEYIKDETLINLL--KELLP-----ESEHNIDW-----FLQAKM-----                                                                                                       |                         |       |                                                                        |
| 331001027 | <i>Parasutterella excrementiformis</i> YIT 11859                   | :- --ENLRALSLSYLKRRGYARTAE-TDTSVLESLEDPVSSAPGFTAFNF--DSEPLNTOEARANSPE-----TKALM-----KELSOQ-----EADF-----KYL-ITKTSFPFYS-----                                                         |                         |       |                                                                        |
| 34557932  | <i>Wolinella succinogenes</i> DSM 1740                             | :- --LVDPEITRGLPNKRGYTAGF-LDEKSKDALESIDL--KEFLSEKIQSIDRSDYEDPILQIAS-----NAESFK-----DYKGF-----EAVFASHTSPNKLELDELKSEY-----                                                            |                         |       |                                                                        |
| 118497352 | <i>Francisella novicida</i> U112                                   | :- --KDTPQASIFLNRRGSFSI-----TDGYSPEYLVNPEQVKAILMDIFDDYNGEDDLSYLKILATEQESKISEIYNKLMQKILEFKMLKCLTDIKDKVSTKTLKEITSVFELLADYLANYSELKTKQFSYTKQNLKELSYHDKYNIQDFEFKXKHAITINDRI-LDTLLDDDLIWN |                         |       |                                                                        |
| Motifs    |                                                                    | :- --E-----R-----R_Nase_H_II-----                                                                                                                                                   |                         |       |                                                                        |

#positions selected for tree reconstruction (272)







303229466 *Veillonella atypica* ACS-134-V-Col7a : ----DVSMED-----IIUD---ITIGFSGK---MLRQTLRNFQSQ---LN---DFTIK-K-LSKL---RYRD---WGRLSKLLGDGDDCK-----AGNGAPKTI-----

34762592 *Fusobacterium nucleatum* subsp. *vincentii* ATCC 49256 : ----YKIESK-----SILW---KCLYGDGDK---IFPKIKNYGDI---LN---KDEIK-K-INSF---KFPT---WGRLSKLLGTGIEFFNL---FTGECYSYVM-----

37430977 *Fillofactor* *alocis* ATCC 35896 : ----IQMLED-----TIKW---ITYVGNDRK---MLKRVIKAMYSQ---LP---EQMQK-I-TGF---QJSG---WGNFSKMPKLGISGDY---STGETFDLIT-----

320529778 *Soibacterium moorii* F024 : ----FTREIE---TIKJ---ILYVDPKDS---MLRWLKNNGY---LS---ENDVK-Y-LAKL---NYKE---WGRLSKTLTDITTYTNP---EDGRCASILDN-----

291520705 *Coprococcus catus* GD-7 : ----SQRAKEA-----VILN---VVLFGDDK---LLKQRLSKMYPN---LT---TQOLGK-ICSL---SYQG---WGRLSKTPLEEITVVPAP---GTGEVNIIMT-----

42525843 *Treponema denticola* ATCC 35405 : ----TKMLLEE---IIRWAT---IYDGEKGT---ILKTKIKAEGYKY---CS---DEQIKI-IINL---KFSG---WGRLSKRFLETVTSEMP---GFSEPV-----

304438954 *Peptoniophilus duerdenii* ATCC BAA-1640 : ----YKRIIEE---IKRL---IYLVYEDTK---VLKXKIKSAYNDK---FT---DDIKKI-IAAL---NYKD---WGRLSKRFELTGIEGVDK---TTGEGKSIIY-----

224543312 *Catenibacterium mitsuoaki* DSM 15897 : ----NFDLIEN---IIYV---LT-VEFDKK---IMKRRLKKYVA---LP---DDKVK-Q-ILKL---KYKD---WSRLSKLLDGIIVADNR---FGSSVTVLD-----

36798909 *Streptococcus mutans* DSM 1459 : ----NKILED---LIYV---LT-LFEDRE---MKRRLNRYSD---LL---TRQVVK-LERR---HYTG---WGRLSAEIILGRNKES---RKTILDYLDL-----

374309778 *Streptococcus pyogenes* S170 : ----NFDLED---NFDL---LT-LFEDRE---MIEELVQVLE---LP---MKVMNQ-LKRR---RYFD---WGRLSKINCRKGR---KTLTKLITKTRN-----

16901805 *Listeria innocua* Clpi11263 : ----NTRMLEN---NTRMEL---LT-LFEDRE---MIEELVQVLE---VF---DGVVK-Y-LQDQ---WGRLSAKLLMGRDKQS---HLTDLYLMDN-----

116628213 *Streptococcus thermophilus* LMD-9 : ----NEALIEE---IIHT---LT-LFEDRE---MIKQRLSKFEN---FL---DKSVLKK-LSRR---HYTG---WGRLSAKLINGRDKES---GNTILDYLDL-----

323463801 *Staphylococcus pseudintermedius* ED99 : ----KRAQEE---IIQW---IT-IFEDDK---ILVQLKKECEYP---EL---TSKQIQ-LKKL---NYSG---WGRLSKELLTHAYQ---GHSIIEHLH-----

352684361 *Acidaminococcus intestini* RY-CR-995 : ----TRDDVER---IVER---MT-YVSDTK---RVRLMANNYG---TL---TADVVKH-ISRLL---RKHD---FGRLSKMPFTLKGVKHKETGE---RASILDPMWN-----

302336020 *Olsenella* *ulii* DSM 7084 : ----DYTIMQ---IILW---ST-LFEDRD---ILKRIIEAYGGD---RL---TSEQIV-ICKK---RFTG---WGRLSKRLTDIKVNTDTG---RKSIIMDLREG-----

366983953 *Oenococcus oeni* DSM 17330 : ----NELLLEE---ITEL---QT-VEFDKK---VLRQLDQDLD---L---SDHNREK-LSRK---HYTG---WGRLSKLLTKLVONADKIDNQFTDVPFMQSIIDTLN-----

313068728 *Bifidobacterium bifidum* S17 : ----HRDLEK---IYEL---QT-VEFDKE---TLHRLQRLG---LS---BAQK-L-LVNT---HYTG---WGRLSKTLTKAGCECT---SDDFAPR---KHSIEI-----

259509199 *Lactobacillus rhamnosus* GG : ----KILDIEN---IYIM---ST-VEFDHT---IFETLKLAEW---LD---PWKINE-LSGI---RYRG---WQPSKRLLDGLKLGNG---HTVIG-----

300361537 *Lactobacillus gasseri* JV-V03 : ----YDKFER---IIEW---ST-IFEDEA---IYKDKLTKIW---LV---DROIDK-LSKI---RMOQ---WQLSKLLSQITDNNNG---QTI-----

169823755 *Finegoldia magna* ATCC 29328 : ----DVMVED---LIEK---ITIHTGNK---ILKKYIIEEYFD---LS---SSQIQ-IINL---KYKD---WGRLSKLLDGLKGTKK---ETE---KTDVIL-----

47458868 *Mycoplasma mobile* 163K : ----VLHIDA---I-SMI---LN-KFS---TIDDRIRILEGVEFFNSLK---TDQRIIRILEGVEFFNSLK---KDYKSSYEIAKLREFFSG---TSSLSFGAYYKIPNLI---SEGS---KNYSTI-----

284931710 *Mycoplasma gallisepticum* str. F : ----HLIYSNR---VDSANL---KE-FSDSNK---LPERILOQKQDGLKPLFQ---LYDKDK-ILAQ---TKDDEK-ILAQ---THSLSKAMLAITRMT---NL---DNEDDN-----

363542550 *Mycoplasma ovipneumoniae* SC01 : ----E-KSRGQ---DEVLYK---LT-KNPIFE---VLKIDREQLDFVKISIFSN---TKNFKK---IGNFSKALRFBFLPM---F---EONK-----

393932386 *Mycoplasma* *sp.* 14 : ----QKLSMNK---QSEL---QT-FKREEL---NENKLEKELFKLGNG---FKNINSE---THLSKAKAIRNIPCLR---L---DNEI-----

71894592 *Mycoplasma synoviae* 53 : ----NTEILYF---LDYVLAISYSSDKERNE---WFKLLKELYPKIKNNNLEIINVEDIPE---ITDQKFEFSPK---THLSREAFNHILPPLL---SMBEK-----

238924075 *Eubacterium rectale* ATCC 33656 : ----IGVI---MT-INTDKE---AMMAFQKSWID---LV---DDVQCLINMRKTNGALFNK---WQPSKIKINNMLPEMY---AQPKE---QMTLTL-----

116627542 *Streptococcus thermophilus* LMD-9 : ----RETLDK---LAVV---LT-LNTERE---GIQEALEH---FA---DGSFQKQVDELQVFRKANSIFGKWNHNSVKLMMELLPELY---ETSSE---QMTLTL-----

315149830 *Enterococcus faecalis* TK0012 : ----PTETDC---LAKV---LT-LNTERE---GIENLAFE---LP---ELSESVK-LLVLDRYKELSQISQTSWHRFSKTLHLLPELM---NAT---SEQLNT-----

315659848 *Staphylococcus lugdunensis* M23590 : ----NEVDLQ---TABI---LT-IYQKD---SISKLTLEDL---LL---NEEDKEN-IAQL---TGTY---THRLSKCIRLVLBEQW---YSSRN-----

160915782 *Eubacterium dolichum* DSM 3991 : ----DHFVDE---TABI---LT-KTKDIE---GRKKQISE---LS---SDLNSES-VHQLAGLTKFTA---YHSLSKALRIBNEEML---KTELN---QMSIT-----

393932386 *Lactobacillus* *corniformis* subsp. *torquens* KCTC 3535 : ----SRLGLR---TGTL---LT-PYSDRK---RRERFAPEM---LP---ABIE-K-LPLD---NFSK---FRLSLSKSMNIPFLE---MGQ---VYSAT-----

310780384 *Lysibacter polytrogus* DSM 2926 : ----DKSKLD---IIEI---LP-FYKSRK---ITRKNLAKLE---LD---REDFIL-LESE---FSGS---YAPLSKAKIRLIPLYE---KGL---SYNEK-----

325677756 *Ruminococcus albus* 8 : ----DNNVLR---IGIV---LS-OAQTPK---RREKALANIG---LD---DGLIN-E-LTKL---KLSG---TANVYSVQGSIEAFC---EGD---LVGQYQ-----

187736489 *Akkermansia muciniphila* ATCC BAA-835 : ----AANRLR---GKSVTPNYLLNL---LKSRSGESE---ALEKIEKESK---KE---ADYADTP-LPKK---YATG---RAPYARTVLKVVVEIL---DGE---DTPFA-----

117929158 *Acidothems cellulolyticus* 11B : ----LADNSI---LVAA---LADNSIAGE---EQUELVH---LD---DAEA-L-LEGL---ALPSG---RVAYSRLTSLGTRVMR---DDGV---DVHNR-----

189440764 *Bifidobacterium longum* DJ010A : ----SNEHSA---MIRL---LS-NTVID---KVEDVAYASAIIEIDGL---DAA---ITKLDSDVLPSSG---RAAYSVTLQKLTQML---TTDD---DLHEAR-----

256819408 *Bifidobacterium dentium* Bd1 : ----MYELLN---TYVID---VRREBDES---SAVAIDSL---L---GBEELTA-LDSV---DLSG---RAAYSQTLRQLTQRLM---NTDD---DLHEAR-----

393932386 *Corynebacterium* *theriacis* NCTC 13129 : ----TPEILR---TABI---LS-PREDIT---SIRNGLDGLDLDL---VV---BALMO---AAAGDFKPTR---AHSLSAKAIRNIPCLR---EGL---VISEK-----

187250660 *Elusimicrobium minutum* Bel191 : ----SEAQDS---PLYD---MM-SCPDEK---LITKLNENYH---LT---EERIDNA-FNEI---VLSGS---YAPLSKAKIRLIPLYE---NDL---SVTEAN-----

319957206 *Nitratifractor saluginis* DSM 16511 : ----ALQIFRE---LARI---LQ-SRKTPO---EALDRRLAMAKGG---ID---TDRE---LLEL-FMKNRS---TRELSHRMLLEALELFL---EGY---DEKVOQ-----

325972003 *Sphaerochaeta globus* str. *Buddy* : ----SEEQDD---FFSA---WT-NTPDK---LRSKYLKMLHL---LT---ENEVDA-LKTV---SLIGD---YGPIGKTATOLKMHLE---DGL---TYTEL-----

261414553 *Fibrobacter succinogenes* subsp. *succinogenes* S85 : ----SPELEMA---LWHI---LV-FYEDDK---ELETALHPAQKQ---WN---EKFAK-V-FSKA---KPKKD---YGSYSEKAIKLLSLMR---MGK---YNNQDN-----

60683389 *Bacteroides fragilis* NCTC 9343 : ----SNEELDN---OPYYKLWHL---LY-SFEGDNTPTGNRLQKMTLEYGF---EKELYAT-LANV---SPQDD---YGSLSAKAIHLLPHLK---EGN---RYDVAC-----

256819408 *Capnocytophaga* *chracea* DSM 7271 : ----QDYSQV---LWV---LV-SFEGDNTPTGNRLQKMTLEYGF---EKELYAT-LANV---SPQDD---YGSLSAKAIHLLPHLK---EGN---RYDVAC-----

393932386 *Rhodopseudomonas palustris* B18 : ----TPEILR---TABI---LS-PREDIT---SIRNGLDGLDLDL---VV---BALMO---AAAGDFKPTR---AHSLSAKAIRNIPCLR---EGL---VISEK-----

373501184 *Prevotella micans* F0438 : ----NEHIVSYTEED---IWHV---CV-NAEDPE---EVSNPARKALH---ND---ENIK-E-LVRL-TPSQG---YAMLSKAIKIRNINMLL---LGL---KYSDAVLLAKLPDVVPSVDLHAIETPEFLQEKLNQKQININSVLANKYS-----

294674019 *Prevotella ruminicola* 23 : ----RFQJND---WGVV---LV-FYDEDD---KLKEPAKDRLO---LD---DELAB-K-FSKI---SIPND---YAMLSKAIKIRNIPLYRD---YGL---IYSEAVFLANLVDIVPVHGWIKIE---MREAAENVI-----

365959402 *Flavobacterium columnare* ATCC 49512 : ----NTEKNEV---TKSVDDKDLWHL---LS-VATSDT---VLYDFAIEKLE---LE---PKNAK-A-FSKT---KLKDK---FASLSAAAIKILPYLK---QGL---LYSHAVFMANEIVDAIKWBDEEQKFQSKIVELVDNIYVEKSKLELIN-----

312879015 *Aminomonas paucivorans* DSM 12260 : ----RDLDLS---IADT---LT-FYKNEE---LILPRLESGL---LS---PENAR-A-LAPL---SFGS---THLSLSALGKLLPHLE---EGK---SYTOAR-----

83591793 *Rhodospirillum rubrum* ATCC 11170 : ----DRDRDR---VFSO---LWAARQRS---ALLALI GDPRPTR---VT---EDETAA-VADAIQIIVLPTG---RASLSAKAARAQAQA---PGI---GYDEAV-----

294806111 *Candidatus Punctispirillum marinum* TMCC1322 : ----DEBSQDS---PIIM---LQDDQKGD---EVRSLTQOYQ---LS---DDVADC-LDVR---LPGD---HGSLSKADIRLIPVLR---DQGL---IYDVAV-----

121608211 *Vermisphaera* *eiseniae* EF01-2 : ----SQAODE---IWMR---LV-SQSESG---ALIAWQJGT---VD---CVBAKAI-VNTRL---PDG---YRSLSKALRIPVLAQ---REVQ---TYDKAV-----

344171927 *Ralstonia snyderi* R24 : ----SLDQDR---LVCL---LD-DGNDNA---VLADALREHYG---IT---DAQID-T-LGLL---SFGDG---HWRGLRSALLRDLDALESGRDQQLPL---SYDKAV-----

159042956 *Dinoroseobacter shibae* DF1 12 : ----EVISR---IRR---VQ-SDAHEA---EALDNLTEAHD---LD---RAHAETAHAPL---PDG---YRGLGTATTRTLIYQLT---ADVV---TYDVAV-----

288957741 *Azoospirillum* *sp.* B510 : ----PLEEQDA---LVEL---LL-TEAPEE---RAIAALTARWA---LD---EAT---AAKLAGATLPDF---HGRYGRRAVARELLVPLERETRGDPPDGRV---RPRILEDVAV-----

92109262 *Nitrospirobacter hamburgensis* X14 : ----PPEIOIA---IVAR---LE-ETEDEN---ELTAWLEKECA---LD---DGAARV-VANT---TLPDF---HCRGLRAIKRVLPMQ---DGL---DDGVA-----

148255343 *Bradyrhizobium* *sp.* BTAi1 : ----SLDRQID---LPAV---LE-SALDEA---ATIASLGTHTS---LD---EAAQRA-LSAL---LPGD---YCRGLRAIKRVLPMQ---DGL---TYEAA-----

34557790 *Wolinella succinogenes* DSM 1740 : ----LGRHADE---ATKI---LT-YYKDEG---QKREELTKLP---LE---AEWV-R-LVKI---GSPD---FKLSLKAIRDILPAME---SGA---RYDEAV-----

21953121 *Campylobacter jejuni* subsp. *jejuni* NCTC 11168 : ----SQDLEE---IARD---IT-LIKDEI---KLKALKAYD---LN---QNDIQ-S-LSKL---EPFD---HNLISFKALRIPFLM---EGK---KYDEK-----

791276265 *Helicobacter mustelae* 12198 : ----DRKTDK---IANI---LG-ANKWDE---ALKELESIQ---LS---KEQITDKARL---NEFK---HINLSLEALVHLLPMLR---EGK---RYDGVQ-----

229113166 *Bacillus cereus* Rock1-15 : ----QKLLYDA---IAAA---ST-FFKNDI---EPRDYLRYVLDNNGKRSNIA---NKVFEK-VIAAVFELNFSK---VCHLSFKSLVKIPLHLE---KGL---DYKAI-----

222109285 *Acidovorax* *eburus* TPSY : ----DPTLQD---IATV---LS-YYKIDA---EVVQQLQLA---LP---EPAASIAVLEKI---SFPK---FSSLKALKALRIPVLMQ---SGL---RYDEAV-----

189485225 *uncultured* *Termite* group 1 bacterium phylotype RaD17 : ----NFDLDS---LVNI---IA-NLKDDE---S1KKFEQKLE---ID---EDIDV-LLNPF---EFKK---FINLSFKALRIPVLMQ---QOQ---KYITAS-----

182624245 *Clostridium* *perfringens* D str. JGS1721 : ----NRNLND---IAYV---LT-LGKTDI---E1EKQLRLE---VP---EELFES-LLDM---SFKN---FNNLSIYALEKILPFMK---EGY---QYNAC-----

220930482 *Clostridium cellulolyticum* H10 : ----NRESDN---LFCY---LT-YYKNDN---E1KDYQAN---L---LDYLLY-IAKL---PTFNK---FKHLSAMKRLIPFME---KGY---KYSDAC-----

154250555 *Parvibaculum lavamentivorans* DS-1 : ----ETPDKR---VILL---S-KDKD---AREAAANSF---VA---DFYITQALQKQLKLPFG---WEPYSFALALFALAE---KGE---RPSALV-----

257413184 *Roseburia intestinalis* L1-82 : ----VRLDFE---IGMI---LT-CYKNDI---S1RERLAKLG---LV---PIEMGL-LAYT---P-TK---PQHLSMAMNIPFLE---KGM---TYDKAV-----

218767588 *Neisseria meningitidis* 22491 : ----SFKLQDE---IGTA---FS-LYKTDI---DITRLKDR---IQ---PELLEL-LKHI---SFKD---FVQSLKALRIPVLMQ---QOK---RYDCAK-----

15602992 *Pasteurella multocida* subsp. *multocida* str. *Pm70* : ----KFDLDE---IGTA---FS-LYKTDI---DIQYLTN-K---VP---NSVINAL-LVSL---NFKD---F1ELSKSLRKLPLME---QOK---RYDQAC-----

319941583 *Sutterella wadswothensis* 3 1 45B : ----FGG---IYNAIYTAQVRENVNKLPRN---AQDKELL---T1RDRV---AETADFAIANGLS---DEQKRFANPFLAQFYTLIETEVEV---SGF---SATT1AVHLENARMT---IKDAVIN-----

254447899 *gamma* *proteobacterium* HTCC5015 : ----YLK-EYGLQO---LHLKAGKK---LDDKPLA---LLYKNS---GL1ASKI0EALNIE---PDEVRFASPSHLAQIPNIEGDV---AGF---NKTCTACTYENIWRMQEKEVSLTNQLLSE-----

54296138 *Legionella pneumophila* str. *Paris* : ----AFKIDYEEAL---NHEPE---SNNKALI---K1QTI---PDI1QAIQSHLGN---DSQALYHNPFLSGLYTLIETKR---DGF---HNHCVAVTENYRYSQKTEIDPELSY-----

331001027 *Parasutterella excrementiorum* YIT 11859 : ----YSEDYKFKV---TLKKEKTEKELSKFANV---KVLKW---SEVYPTKELRSL---VA---DEAQSEFNLSYLAQILNLETER---NGF---SVLSLAHLENARMT---MTDG-----

34557932 *Wolinella succinogenes* DSM 1740 : ----FTKDIIEEL---KDDPAELSKERAKL---RLTDVI---LNEWSQIINFDDI---DKHQRFNLSMAQLHTVITDPR---SGF---SNTCKACTAENRFPSTAFYNDTEGE-----

118497352 *Francisella novicida* U112 : ----LNHNINAR---NTKCKEKEIINLCKIE---GSEDEK---GNYKHGLAYELGLVLFGEFNEAKPE---PDKKIKFNISYFAIQIQAFAER---KGN---AANTCAVCSADNHRMQIKITEFVED-----

Motifs : -----

#positions selected for tree reconstruction (272) : -----

|           |                                                                    |      |                              |                                                                                                                                                                |                                             |                                                                        |             |
|-----------|--------------------------------------------------------------------|------|------------------------------|----------------------------------------------------------------------------------------------------------------------------------------------------------------|---------------------------------------------|------------------------------------------------------------------------|-------------|
| 303229466 | <i>Veillonella atypica</i> ACS-134-V-Col7a                         | ---- | I-----                       | -----ELMNRDYSNMLILGDQKFS-FMECI-EENAKLA-----                                                                                                                    | -----                                       | -----QQQVNPDIIDEALSAPVAKRAVQALRIVDEVAHI-----                           | -----KKA-LP |
| 34762592  | <i>Fusobacterium nucleatum</i> subsp. <i>vincentii</i> ATCC 49256  | ---- | -----                        | -----EALRRNTYNNLMELLSSKFT-LQESI-DNENKEMN-----                                                                                                                  | -----                                       | -----EVSYRDLIELSEYSPSLKRAIQLTFLIYBEIKKI-----                           | -----TGR-VP |
| 37430778  | <i>Fillifactor aloocis</i> ATCC 35896                              | ---- | -----                        | -----AMWTDNMLIILSKFT-EMNIN-EDPNSKIV-----                                                                                                                       | -----                                       | -----GKIDKITDITVKEFMSFENKRAVQTITQVABEIKVI-----                         | -----MGC-RP |
| 32052878  | <i>Solibacterium moorei</i> F0204                                  | ---- | -----                        | -----MWNTRIMELIISNEKIQPKQKI-EYIKAEYI-----                                                                                                                      | -----                                       | -----DEKQNLHELDMYSPARRSISWQLKIVDEIYDI-----                             | -----KKS-AP |
| 291520705 | <i>Coproccocus catus</i> GD-7                                      | ---- | -----                        | -----LWQYTDNMLQLLSSRYG-FTNEV-EFNTLKK-----                                                                                                                      | -----                                       | -----ETDLSYKTVDELVSFAVKRQIQTQLKVVKQLKIV-----                           | -----MGN-AP |
| 42525843  | <i>Treponema denticola</i> ATCC 35405                              | ---- | -----                        | -----NIITAMRRTQNNMELSSSEF-TFTENI-KKINSQFE-----                                                                                                                 | -----                                       | -----DAEQKFSYDLGKPKLFLSPSVKMLQTLKLVKISHI-----                          | -----TQA-PP |
| 304438954 | <i>Peptoniphilus duerdenii</i> ATCC BAA-1640                       | ---- | -----                        | -----FMREYNLNMELMESHGT-FTEEV-EKLVPVEN-----                                                                                                                     | -----                                       | -----RELCEYMEVDLIVLSPSVKMLQSLRVVDEIKRI-----                            | -----IGK-DP |
| 224543312 | <i>Catenibacterium mitsuokai</i> DSM 15897                         | ---- | -----                        | -----VLEMSRLNMLMEIINDRDLGVAQMI-EAETSCEP-----                                                                                                                   | -----                                       | -----DGKFTYEVEERLAGSPALKRKIQWSLQIYVEITKV-----                          | -----MKC-RP |
| 24379809  | <i>Streptococcus kitaharae</i> DSM 17330                           | ---- | -----                        | -----GNSNRNFMOQLINDD-ALSFK-EBIAKAQV-----                                                                                                                       | -----                                       | -----IGBTNMLNVVSDIAGSPFAIKKGIQLSGLVLDLVI-----                          | -----MGH-OP |
| 151675041 | <i>Streptococcus pyogenes</i> 5370                                 | ---- | -----                        | -----GFANRNFMOQLINDD-SLTFK-EDIQGAKV-----                                                                                                                       | -----                                       | -----SQQSSLMVWDLRSPVVKRGIQLSGLVLDLVI-----                              | -----MGR-KP |
| 16801805  | <i>Listeria innocua</i> Clpi11262                                  | ---- | -----                        | -----MNRDNLNMLLINDS-MLSFK-ENYIKAEYI-----                                                                                                                       | -----                                       | -----DEKQNLHELDMYSPARRSISWQLKIVDEIYDI-----                             | -----KKS-AP |
| 116628213 | <i>Streptococcus thermophilus</i> LMD-9                            | ---- | -----                        | -----GLSRRNFMOQLIHHDD-ALSFK-KKIQAQI-----                                                                                                                       | -----                                       | -----IGD-EDKGNIEKVVSKLSPSAPKIKKGIQLSGLVLDLVI-----                      | -----MGR-KP |
| 323463801 | <i>Staphylococcus pseudintermedius</i> ED99                        | ---- | -----                        | -----SDENFMELIINDD-VYGFQ-NFIKEENQ-----                                                                                                                         | -----                                       | -----V-QSNKIHQIDIANLTTSPALKKGIYRSTIKLVRITSI-----                       | -----FG-EP  |
| 352684361 | <i>Acidaminococcus intestini</i> RCY-RM95                          | ---- | -----                        | -----TNDNLMLLIS-E-CYTF5-DEITKLQE-----                                                                                                                          | -----                                       | -----AAYAKAQLSINDFLDSMYSINAVKRPYITLAVVDLIRKA-----                      | -----CGT-AP |
| 302336020 | <i>Olsenella uli</i> DSM 7084                                      | ---- | -----                        | -----NPNNGQRSTVMFVMEVLRDE-DLGFQ-KAIDGLNR-----                                                                                                                  | -----                                       | -----DYFRRHNLGMD-VNDLPGSPARRSIINQAVRIDEIASI-----                       | -----ARK-EP |
| 366983953 | <i>Oenococcus oeni</i> DSM 17330                                   | ---- | -----                        | -----TKMNMELIINHAE-DDGFVR-AMIDKQNT-----                                                                                                                        | -----                                       | -----TD-GDEQDYSVLIIDELAGPKEIKKGIQVGFRLIDDIITRA-----                    | -----VGY-AP |
| 131028678 | <i>Bifidobacterium bifidum</i> S17                                 | ---- | -----                        | -----TMRAEDNMLMELITDQLGSDMVI-EENLGAE-----                                                                                                                      | -----                                       | -----NGSSLMVWDLRSPVVKRGIQLSGLVLDLVI-----                               | -----MGR-KP |
| 259509199 | <i>Lactobacillus rhamnosus</i> GG                                  | ---- | -----                        | -----EMLLSNNMLMQLIADDE-LKEMT-TLNQOKI-----                                                                                                                      | -----                                       | -----RSTDIEDVINDAYTSPSNNKALQVLRIVDEIKHA-----                           | -----ANG-QP |
| 300361537 | <i>Lactobacillus gasseri</i> JV-V03                                | ---- | -----                        | -----IQQLWDSNNFMQIVNQSD-FKDAI-AVANONLL-----                                                                                                                    | -----                                       | -----VNTSVEIILNAYTSPSNNKALQVLRIVDEIKHA-----                            | -----ASG-KV |
| 169823755 | <i>Finegoldia magna</i> ATCC 29328                                 | ---- | -----                        | -----NFRNNSDNLMQIIGSQNYSFNEVI-DKLKRYKI-----                                                                                                                    | -----                                       | -----PQELISYEVVENLYSPSVKMIQWVIRVTEITKV-----                            | -----MGY-DP |
| 47458868  | <i>Mycoplasma mobile</i> 163K                                      | ---- | -----                        | -----SYEEKALQNKQN-----NF5HS-NLFKETW-----                                                                                                                       | -----                                       | -----EDLSPASPTVKRSLRQTMMLLEKIFKY-----SEKNLEI                           | -----       |
| 284931710 | <i>Mycoplasma gallisepticum</i> str. F                             | ---- | -----                        | -----QKNDRGNWFPAIKNFQPK-FIDIT-KKNNLSL-----                                                                                                                     | -----                                       | -----KQNK-RYLDLDFRINDAALSLSQPAKILREATVFNALIQ-----FSEEDV                | -----       |
| 363542550 | <i>Mycoplasma ovipneumoniae</i> SC01                               | ---- | -----                        | -----NBYELKWKDEE-IRRWK-EBQSKLQ-----                                                                                                                            | -----                                       | -----KTDKKTYLNAPRIPQDEIISFGPTNFFQDAVLVLAQIKK-----YSHENI1               | -----       |
| 394303286 | <i>Mycoplasma</i> sp. 14                                           | ---- | -----                        | -----QWRLEAKNYDEE-IKSKI-EMSSLSMA-----                                                                                                                          | -----                                       | -----KQDK-KYLINDNPLDKALRSPVVKRGIQLSGLVLDLVI-----                       | -----MGR-KP |
| 71894592  | <i>Mycoplasma synoviae</i> 53                                      | ---- | -----                        | -----MYSELKHSNELKIRTEKA-ELAAQ-QN-----                                                                                                                          | -----                                       | -----QKYLKMDPLKALVPLSFKTSVLQIKLIFNQILKN-----PGKVEI                     | -----       |
| 238924075 | <i>Eubacterium reetale</i> ATCC 33656                              | ---- | -----                        | -----EMGVTKTGQVEFAG-----LKVI-PV-----                                                                                                                           | -----                                       | -----DVSIEDIINFVVRSVRSISFKILNLAIVLK-----YK-AL                          | -----       |
| 116627542 | <i>Streptococcus thermophilus</i> LMD-9                            | ---- | -----                        | -----RLGKQTKTSSNNK-----                                                                                                                                        | -----                                       | -----TKYIDEKLLTEIYNPVAKSVRQAIKIVNAIKE-----YG-DP                        | -----       |
| 315149830 | <i>Enterococcus faecalis</i> TX0012                                | ---- | -----                        | -----LEQFQLKSDVRRKYSYEKLLPT-----                                                                                                                               | -----                                       | -----KDLVLAIYNPTVNRVTSQAFKVLIDALLIK-----YQKQI                          | -----       |
| 315659848 | <i>Staphylococcus lugdunensis</i> M23590                           | ---- | -----                        | -----QMLFTHLNIKPKKI-----NL7AA-NKIPKAMI-----                                                                                                                    | -----                                       | -----DEFILSPVVKRFTTQQAINLNLKILEK-----YG-VP                             | -----       |
| 160915782 | <i>Eubacterium dolichum</i> DSM 3991                               | ---- | -----                        | -----LPLGKQNNLEKSVG-----                                                                                                                                       | -----                                       | -----MKNIQADDTAALSLSQPAKILREATVFNALIQ-----YG-EF                        | -----       |
| 336393381 | <i>Lactobacillus coryniformis</i> subsp. <i>corquens</i> KCTC 3535 | ---- | -----                        | -----GWRLEAKNYDEE-IKSKI-EMSSLSMA-----                                                                                                                          | -----                                       | -----DTRIEITNVPVRAVTKTITVILVIRK-----YK-RP                              | -----       |
| 310780384 | <i>Lilyobacter polyotus</i> DSM 2926                               | ---- | -----                        | -----EKADYDYKNNGIKFKRGE-LLPVM-DK-----                                                                                                                          | -----                                       | -----DLIANPVLRALISQTRKIVNAIIRK-----YQ-TB                               | -----       |
| 325677756 | <i>Ruminococcus albus</i> 8                                        | ---- | -----                        | -----EAKFNKEIPIDENAKPQ-KLPFP-KN-----                                                                                                                           | -----                                       | -----EDDCEFFKNNVVRVSNETRKLINAIIIDK-----YK-AL                           | -----       |
| 187736489 | <i>Akkermansia muciniphila</i> ATCC BAA-835                        | ---- | -----                        | -----RGEAHPDGLKAGDCLCYLLDDT-SSVNQHQK-----                                                                                                                      | -----                                       | -----ERRLDTMNNLHVRHMLILDRLLKLDIQ-----FADGQK                            | -----       |
| 117929158 | <i>Acidotherrum cellulolyticum</i> 11B                             | ---- | -----                        | -----KTFCGDDDNWRPPL-----                                                                                                                                       | -----                                       | -----PALHEATGHVDRNLALRFLSASATMR-----WG-PP                              | -----       |
| 189440764 | <i>Bifidobacterium longum</i> DJO10A                               | ---- | -----                        | -----KTLFNVNDSWRPFA-----                                                                                                                                       | -----                                       | -----DPIGEPNDSVDRVLRKNNRVLNMCQQOR-----WG-NP                            | -----       |
| 283456135 | <i>Bifidobacterium dentium</i> Bd1                                 | ---- | -----                        | -----KAFVGVDDNNWPPV-----                                                                                                                                       | -----                                       | -----DAISVGVNPAVDRVLRKIVNRYLACQRK-----WR-NP                            | -----       |
| 38232679  | <i>Corynebacterium jeikeium</i> NCTC 13129                         | ---- | -----                        | -----LQERHAFMELT-----                                                                                                                                          | -----                                       | -----LQERHAFMELT-----                                                  | -----       |
| 187250660 | <i>Elusimicrobium minutum</i> Bel191                               | ---- | -----                        | -----EALKEGKLTKKEQAQIKD-RLPYV-GAVLQEST-----                                                                                                                    | -----                                       | -----QKILAKGSPQPKDKGVKTPHTNMYEYLRVANPVHQITLNEKRLNVEIIDI-----LQK-RP     | -----       |
| 319957206 | <i>Nitratifactor saluginis</i> DSM 16511                           | ---- | -----R-----IL-----           | -----GDFDRE-----DY5RY-PKSLRHHL-----                                                                                                                            | -----                                       | -----LREGNLFKEEKNPINHAWKLSLAWALGLADLSDR-----YQ-PF                      | -----       |
| 325972003 | <i>Sphaerochaeta globus</i> str. Buddy                             | ---- | -----                        | -----ERQMETQEPQLSVMGQQLLPPY-GQILTGST-----                                                                                                                      | -----                                       | -----QALMGKYHSAFPEKRDSEGFPKPTNDSDEKGRIANPVHQITLNEKRLNVEIIDI-----LGA-KP | -----       |
| 261414553 | <i>Fibrobacter succinogenes</i> subsp. <i>succinogenes</i> S85     | ---- | -----IDKNTLDRIDKILINGEYDEKIS | -----                                                                                                                                                          | -----NRVRDANLNLDIS-----DFRGL-NKVLACYL-----  | -----VYDRHSEAKDCTKNWSP-----EIDSYLKFKQHSRNPVEQVVTLETRVTDIWIQ-----EG-QI  | -----       |
| 60683389  | <i>Bacteroides fragilis</i> NCTC 9343                              | ---- | -----                        | -----VYGYRHSESSLT-----REBIA-NKVLKDL-----                                                                                                                       | -----                                       | -----MLLKNLHNPPVVEKILNQMNVINIIDI-----YQ-KP                             | -----       |
| 256819408 | <i>Capnocytophaga ochracea</i> DSM 7271                            | ---- | -----                        | -----EKAGYKSKLSLT-----TEELE-ARELKNII-----                                                                                                                      | -----                                       | -----PLKKNALRNPPVVEKILNQMNVINIIDI-----YQ-KP                            | -----       |
| 90425961  | <i>Rhodospseudomonas palustris</i> B1818                           | ---- | -----                        | -----ARVYDHAARLS-----                                                                                                                                          | -----                                       | -----VPLDQVSGVTRKLEALSQVFAVARE-----YQ-P1                               | -----       |
| 373501184 | <i>Prevotella micans</i> F0438                                     | ---- | -----                        | -----KLEENRPHDNQYQLGQDDEIDTIQIKSHIQAQLWQIGADEQTIKIPQAVRSKYQDFPKSYKRRFPVEP-KLGEVLAFLTEKFPNPKSQWRLVYHS-----                                                      | -----                                       | -----QIAIYFPIVDNDR-----SKLRGMNIGAIXKNTVMRLVINTLRVGVQLLDD-----G-VIS-PDE | -----       |
| 294674019 | <i>Prevotella ruminicola</i> 23                                    | ---- | -----                        | -----DVMSYDKNNIDGI-TLEGCKYTKLERY-QVSDNKLKLYHS-----                                                                                                             | -----                                       | -----MLDYP-PRQPNDR-----GVFLQSGRSISVKNMAMHSLFRLKRVNMLKDK-----G-YIT-PD   | -----       |
| 365959402 | <i>Flavobacterium columnare</i> ATCC 49512                         | ---- | -----                        | -----GLLIYNTDEKGRKVVYSKEAESLFEADLRKLLVPFYKANIIEEHEQEIIQDFLPMDQLMQKQEFIKIQRLLDQIEAFLEGEENEGEIFCNH-TDKLKLHYPSDIEVFPKTIKDEWNEKVVLSPLTTSIKNPMAMKALHQLRVLNIIAN----- | -----                                       | -----D-----QID-ED                                                      | -----       |
| 312879015 | <i>Aminomonas paucivorans</i> DSM 12260                            | ---- | -----                        | -----ADAGYAAPDPRHP-----KLPLEE-----                                                                                                                             | -----                                       | -----ADWRNVVFRALQTRVFNALVLR-----YQ-PP                                  | -----       |
| 83591793  | <i>Rhodospirillum rubrum</i> ATCC 11170                            | ---- | -----                        | -----TLALGLHSHRPQERLA-RLPYV-AAALDPDVG-----                                                                                                                     | -----                                       | -----LDGDPVGPPEADDGAAEAAYGRINISVHIALNEKRIVNALH-----HG-P1               | -----       |
| 294086111 | <i>Candidatus Puncicepirillum marinum</i> IMCC1322                 | ---- | -----                        | -----KAPGLGEANLDPVAALSDKLDYV-GKALAGHV-----                                                                                                                     | -----                                       | -----MGASQKFEDSDEKRYGTISNPTVTHIALNQVRAVNNLIRL-----HG-KP                | -----       |
| 121608211 | <i>Vermisphaera eiseneiae</i> EF01-2                               | ---- | -----                        | -----EHTLASTGEVQVQYAFKQDLPYV-GKALQERV-----                                                                                                                     | -----                                       | -----AFQSGDADKHEEYCKIANTVTHIGLQVRYVNNLIR-----YQ-HP                     | -----       |
| 344171927 | <i>Ralstonia syzgii</i> R24                                        | ---- | -----V-----                  | -----AGVPAHTADLENGERD-ALPYV-CELLRWYV-----                                                                                                                      | -----                                       | -----QDAPTAKNDAREFKPKIANTVTHIGLQVRYVNNLIR-----YQ-KP                    | -----       |
| 159042956 | <i>Dinoroseobacter</i> sp. B12                                     | ---- | -----                        | -----KACGWHSDHACTGFCBB-ALPYV-CEVLERHW-----                                                                                                                     | -----                                       | -----IPGSHDDEDDITRGRITNPTVTHIGLQVRYVNNLIR-----YQ-KP                    | -----       |
| 288957741 | <i>Azospirillum</i> sp. B510                                       | ---- | -----                        | -----KLLRGGKHSDSPREGALLDALPYV-GAVLERHW-----                                                                                                                    | -----                                       | -----AFTGNDPAPPEKRVGRVANPTVTHIALNQVRAVNNLIR-----HG-RP                  | -----       |
| 92109262  | <i>Nitrobacter hamburgensis</i> X14                                | ---- | -----GAGYHI                  | -----                                                                                                                                                          | -----SAKRAGYDHAKLPTGSLGLRLPYV-GQWLQDAV----- | -----VGSQDARDKQEKYQVQFPNTVTHIGLQVRYVNNLIR-----YQ-PP                    | -----       |
| 148255343 | <i>Bradyrhizobium</i> sp. BTA11                                    | ---- | -----                        | -----SAQYVDHALLPGKLSPTGVLRYV-GQWLQNDV-----                                                                                                                     | -----                                       | -----VGSDDERDNERNGRPLNPNTVTHIGLQVRYVNNLIR-----HG-PP                    | -----       |
| 34557790  | <i>Wolinella succinogenes</i> DSM 1740                             | ---- | -----                        | -----LMLGVPKKEKSAIPLP-NK-----                                                                                                                                  | -----                                       | -----TDIDILNPVTRAFAPRQFRVANAIVLR-----YQ-AP                             | -----       |
| 219563121 | <i>Campylobacter jejuni</i> subsp. <i>jejuni</i> NCTC 11168        | ---- | -----N-----                  | -----EHLNKVAINDEKID-----FLDAP-NE-----                                                                                                                          | -----                                       | -----TYDKDNPVTRAFAPRQFRVANAIVLR-----YQ-KV                              | -----       |
| 791276265 | <i>Helicobacter mustelae</i> 12198                                 | ---- | -----                        | -----EILQERGIKSPKQPKNRQ-LPLP-SELAK-----                                                                                                                        | -----                                       | -----EESYFEDINPVTRAFAPRQFRVANAIVLR-----YQ-GF                           | -----       |
| 229113166 | <i>Bacillus cereus</i> Rock1-15                                    | ---- | -----                        | -----LQAGYVFRDEMKNRDKKL-FLV1-----                                                                                                                              | -----                                       | -----QOETNPVVRHALQTRVFNALVLR-----YQ-SP                                 | -----       |
| 222109285 | <i>Acidovorax ebursus</i> TPSY                                     | ---- | -----                        | -----AQIPEYGHHSQRTEPGAAKHLYLPPF-YEAQRKYA-----                                                                                                                  | -----                                       | -----GKGDHIGSMQFRDDADIPRNPVRLRALQARVFNALVLR-----YQ-SP                  | -----       |
| 189485225 | uncultured Termite group 1 bacterium phylotype RaD17               | ---- | -----                        | -----TSAGYINKQGEIKN-----                                                                                                                                       | -----                                       | -----KLVPAKENVAVARAFAPRQFRVANAIVLR-----YQ-OF                           | -----       |
| 182624245 | <i>Clostridium perfringens</i> D str. JGS1721                      | ---- | -----                        | -----EKAGYNFKAIYEGVTRK-KLPV1-E1-----                                                                                                                           | -----                                       | -----DEIYNPVNRLAQAQTRVFNALVLR-----YQ-SP                                | -----       |
| 220930482 | <i>Clostridium cellulolyticum</i> H10                              | ---- | -----                        | -----NMAELDFTGS5-----KLECK-NKLTV-----                                                                                                                          | -----                                       | -----EPIENYVNPVTRAFAPRQFRVANAIVLR-----YQ-LP                            | -----       |
| 154250555 | <i>Parvibaculum lavamentivorans</i> DS-1                           | ---- | -----                        | -----NGPDQRGRTNDFPRNQPTFEILKI-PSPAKSEE-----                                                                                                                    | -----                                       | -----KERISQLRNPVTRAFAPRQFRVANAIVLR-----YQ-KP                           | -----       |
| 257413184 | <i>Roseburia intestinalis</i> LI-82                                | ---- | -----                        | -----EBA-GYDFKADSKGTQK-LLTGE-NNYQT-----                                                                                                                        | -----                                       | -----SAQCRRLPACVPRDFGFRICADIRNSWEVAKRILAEVKKVDVT-----NGT-VK            | -----       |
| 218767588 | <i>Neisseria meningitidis</i> 22491                                | ---- | -----                        | -----ARIYGDHY-GKKNTEKI-YLPI1-PA-----                                                                                                                           | -----                                       | -----DEIRNPVRLRALQARVFNALVLR-----YQ-SP                                 | -----       |
| 15602992  | <i>Pasteurella multocida</i> subsp. <i>multocida</i> str. Pm70     | ---- | -----                        | -----REIYGHY-GEANQKTSQ-LLPAL-PA-----                                                                                                                           | -----                                       | -----QERNPVRLRALQARVFNALVLR-----YQ-SP                                  | -----       |
| 319941583 | <i>Sutterella wadsworthensis</i> 3 1 45B                           | ---- | -----                        | -----                                                                                                                                                          | -----                                       | -----GETVRAAQSRLPAETARPFDGLVRLVRDQAWELAKRNVSDIQKVDF5-----NGI--VD       | -----       |
| 254447899 | gamma proteobacterium HTCC5015                                     | ---- | -----                        | -----                                                                                                                                                          | -----                                       | -----IHGERKVPKLSAMCTRLSADSTRPFDQMASIIEHIARKIAQKIAQINDVPK-----EFS--ID   | -----       |
| 54296138  | <i>Legionella pneumophila</i> str. Paris                           | ---- | -----                        | -----                                                                                                                                                          | -----                                       | -----ASRLPADSVRPFQDGLARMQRILAYEAMAKWEQIEKHLPD-----NSS--LL              | -----       |
| 331001027 | <i>Parasutterella excrementiformis</i> YIT 11859                   | ---- | -----                        | -----                                                                                                                                                          | -----                                       | -----SAQCRLPACVPRDFGFRICADIRNSWEVAKRILAEVKKVDVT-----NGT-VK             | -----       |
| 34557932  | <i>Wolinella succinogenes</i> DSM 1740                             | ---- | -----                        | -----                                                                                                                                                          | -----                                       | -----FHKKATAQRLPQVDFGFRICADIRNSWEVAKRILAEVKKVDVT-----NGT-VK            | -----       |
| 118497352 | <i>Francisella novicida</i> U112                                   | ---- | -----                        | -----                                                                                                                                                          | -----                                       | -----NKDKILSAKAQRLLPAIPTRVDFGAVKMKMATLAKNIVDDMNKQVLSA-----KHQ--LH      | -----       |

Motifs :  
 #positions selected for tree reconstruction (272) :  
 \*\*\*\*\*



303229466 Veillonella atypica ACS-134-V-Col7a : S--RIFVVARATNK--SEKKKDKSRQRLSDLSYAI--KDDVLSQGLQKDFEGALKSG-----L---ANYDDAALR-----SKKL-YYLYT---QMGK--CAY-TGNIIDLNLQMTDN---YDIDHYPKSL-TKD---DSFDN
34762592 Fusobacterium nucleatum subsp. vincentii ATCC 49256 : K--KVFIEMARGGDESMKMKIPARQEQKRLKYDSCG--NDIANFSDIKKEMNSLS-----KRL-LYYLY--QFGK--CMY-TGREILDRLQNDNT---YDIDHYPKSL-TKD---DSFDN
374307778 Filifactor alocis ATCC 35996 : K--KIFIEMARGG--KVKKTRKSRKAQLELYACE--EDCRLEKIEI-----DKDRDFNS-----MKL-FLYYT--QFGK--CMY-SGDEIDNLRIGNSK--WRDHIYPQSK-LKD---DSLND
320529778 Solibacterium moorei F0204 : K--KIFIEMAREKKSAMKKTETSRKDTLLELYKSCK--SQADPFYDRLEKFKLMSMS-----RLEK-----DKL-YYLYT--QMGK--SMY-TGRKIDKFLNKNKT---YDIDHYPKSL-LKD---DSLND
291520705 Coprococcus catus GD-7 : K--RVFVEMAREKQ--EKGSRDSRKKQLVLYRACK--NEERDWTIELM-----AQQSQDRLS-----DKL-FLYYI--QKGR--CMY-SGETITDLKMDNTK---YDIDHYPQSK-TMD---DSLNN
42525843 Treponema denticola ATCC 35405 : K--KIFIEMAKGAE--LEPARTKRLKLDQLYNNCK--NDADAFSSKIKDLSGKIE-----NEDRLSLK-----DKL-YYLYT--QLGK--CMY-CGKPIEIGHVFSTN---YDIDHYPQSK-LKD---DSLNS
304438954 Peptoniphilus duerdenii ATCC BAA-1640 : K--KIFIEMARAKE--AKNSKRSRKNLLLEFYKPKKAFINEIGBEERYNLLNEIN-----DNL-YYLYT--QLGR--CMY-SLEPIADLAKSNIN---YDIDHYPQSK-TMD---DSLNE
224544312 Catenibacterium mitouakai DSM 15897 : K--YIVIEFERSE--AKERTSKIKKLENYKDLDD--EQTKKEYKSVLEELKGFDTNK-----KISS-----DSL-FLYFT--QLGK--CMY-SGKLLDSDLSK---YDIDHYPQSL-VKD---DSFDN
324939809 Streptococcus mitans UA159 : E--RVYLEFARKTQ--PT-----NQGRNSO--QRLKGLTDSIKKFGSGILKEH-----PVENSQLOK-----DRL-FLYYL--QMGK--DMY-TGEELDIDLRSQ---YDIDHIPOAF-LKD---NSLND
157655941 Streptococcus pyogenes S170 : K--NIFVLEARDLQ--GQKQKRL--NMKRIKIRLEKLSQSLIKH-----KISKDLQK-----DRL-FLYYT--QMGK--DMY-TGEELDIDLRSQ---YDIDHIPOAF-LKD---NSLND
160180185 Listeria innocua Clp11262 : Q--KIVFEMAREKQ--TT-----GKGNKNSQ--PRYSLEKAIRKFGQILKEH-----PTDNQKLL-----DRL-FLYYT--QMGK--DMY-TGDDLDHNLGN--YDIDHYPQSK-LKD---DSLND
116628213 Streptococcus thermophilus LMD-9 : E--SIIVFEMAREQ--YT-----NOGKNSO--QRLKRLKSLKELGSKILKEN--I-----PAKLSKIDNNAJOK-----DRL-YYLYL--QMGK--DMY-TGDDLDLRLSN---YDIDHIPOAF-LKD---NSLND
323463801 Staphylococcus pseudintermedius ED99 : E--KIMIFATEDDQ--QK--GKQKSRK--QLW--DDNIKNNLKSVDYKQYI--IDVANNLNGEQLQK-----EKL-WLYLS--QMGK--CMY-SGQSIDLDLALLSNATKHYEVDHIFPSP-LKD---DSLND
352684361 Acidimicrococcus intestini RY-CR95 : K--RIFEMARETQ--SK--KKRSVTRR--EQIKNLVRSIRKDFQOV-DF-L--KILKENSQGLQSQ-----DAL-XYLFA--QLGR--DMY-TGSDILKLEHKDQS---FYNDHYPQSK-TMD---DSLND
302336202 Olsenella uli DSM 7084 : T--NIFVETRED--DP--RKGKRTK--RRYDAIKSALEKFKDDPSLV-----KELCEKARGMDK-----DRL-SLYFM--QRGK--CMY-SGRPIKEBLEHTGK---YEVDFIIPRSY-LKD---DSFDN
366983953 Oenococcus oeni DSM 17330 : K--RVYLEFARKTQ--E--ESHLTN--SRKQSTLLKKNAGSELVLTQ-----VSQVDAALQN-----DRL-YYLYL--QMGK--DMY-SGKIDNLELSTN---YDIDHIPOAF-LKD---NSLND
131026728 Bifidobacterium bifidum S17 : K--NIFVLEARDLQ--PGRTIRSRKRLQDLVRANLKLKFKGLADELN-----KISKDLQK-----DRL-FLYYT--QLGR--DMY-TGEELDIDLRSQ---YDIDHIPOAF-LKD---DSLND
259509199 Lactobacillus rhamnosus GG : S--MIFVETADTQK--TACKTQTSRQKQIOTVYANAQALIDSANRGELEKI-----ADKASPT-----DRL-YYLYM--QRGK--DIY-TGAPLNDIQSHG---YDIDHILPQSL-LKD---DSLND
300361537 Lactobacillus gasseri JV-003 : K--QIAIEFTRDAD--DKAKISQFRANKLKVYKELSNLASESTINRELERV-----AKDKQLK-----DKY-XYLYM--QLGR--DAY-TGFEINIDDLQK---YDIDHILPQSF-LKD---DSLNE
169823755 Finegoldia magna ATCC 29328 : D--KIFIEMAKSEE--EKKTITSRKNNLLDLYKAIKKDRDSQYKELLTGLN-----KLDDSDRLS-----RKL-YYLYT--QMGK--DMY-TGEIKDLDKLEFSTH---YKDHIPQSKMDD---S11NN
47458868 Mycoplasma mobile 163K : E--KIVVEVTRSSN--NKHERKKIEGINKYRK--EKYEBLKVVYDLP-----NLNTTLL-----KKL-WLLRQ--QGGY--DAY-SLRKIEANVINKPNW---YDIDHIVPRSI-SFD---DSFNS
284931710 Mycoplasma gallisepticum str. F : T--KVVIELARELS--EKELENTKNYKLIK--KNGDKISEGLKALGISEDEIK-----DILKSPAKL-----YKF-LWLLQ--QDHI--DPY-SLKEIAPDDIPTKTEK--FIDHIIPIYSI-SFD---DSSNS
363542550 Mycoplasma ovipneumoniae SC01 : D--AIIEVSPERNK--DKTITBIRK--KRNKK--GKGTKLEKILQINLNGKVKLS-----DLETPTKTL-----LDRL-RVYHQ--QDGI--DLY-TLKKINDLKLDDPNNA---YIEHIIPIYSI-SFD---NSQAN
394303286 Mycoplasma bialle S14 : D--KVVIELARELMT--QDQENDLAKIQAQK--SEKIKRERQAEHMLIGRQSPD-----DYLKELN-----DRL-FLYYL--QMGK--DMY-TGEELDIDLRSQ---YDIDHIPOAF-LKD---DSLND
71894592 Mycoplasma synoviae 53 : S--QVVIEMARELTKPMLKELLNNAITNSIKILKELK--DQTEKFDPTKXKPID-----KTPNSQVLR-----NKL-PLWFE--QDRK--DPY-TQLDKINRIDE---TRIDHVPYK-SAD---DSFNM
238924075 Eubacterium rectale ATCC 33656 : D--TIVIEMPDRDN--SEQKRRINDSQKLN--KEMEYI EKLAVTYGIKLSFS-----FDSQSKQS-----DRL-KLWNE--QDGI--CLY-SGKTIDNPNIDNNPOL---YDIDHIIPIYSI-SFD---DARNS
116627542 Streptococcus thermophilus LMD-9 : D--NIVIEMARETN--EDEKKAIQKIQKANK--DEKDAAMKAAQNGKALPHSVF-----HGKQLA-----TKI-LRWHQ--QGER--CLY-TGKTISHDLLNNSQK---FEVDHIIPIYSI-TFD---DSLAN
315149830 Enterococcus faecalis TK0012 : R--YITIEMPDRDN--EDEKRIKELHAKNS--QRKNSDSQYFMQKSGWSEKF-----QTI--EKKRFRF-----AKL-LYYE--QDGI--CMY-TGLPISEDLVSDS---YDIDHIIPIYSI-SLD---DSLNN
315659848 Staphylococcus lugdunensis M23590 : E--DIIEELARENN--SKDKQKFINEMQKNE--NTRKRIE IIGKYGN-----QAKRLV-----EKL-RLHDE--QBGK--CLY-SLESIPLEDLLNPNH---YEVDFIIPRSV-SFD---NSYHN
160915782 Eubacterium dolichum DSM 3991 : D--SIIVEMAREEN--SEEQKRIERKQKFFE--MRNKQVADIQDDR-----KINKAKLV-----EKL-VLYQE--QDGI--CMY-SGKIDNLELSTN---YDIDHIPIYSI-SFD---DSLTD
336393381 Lactobacillus coryniformis subsp. torquens KCTC 3535 : D--QVIELARELQK--RNFREKQIQKQKQK--QTNRIKARLTELGI-----PQQGKI-----IRY-KLHRE--QMGK--DPY-TGSDIPFERAISRQ---YEVDFIIPRSV-SFD---DSLND
310780384 Ilyobacter polytrogus DSM 2926 : H--KHVYEARDLA--KSYDDRQTIIEKANKRE--LENKTKRSEIPEGLK-----NVKGLL-----DRL-FLYYE--QDGI--CMY-SGKIDNLELSTN---YDIDHIPIYSI-SFD---DSYSN
325677756 Ruminococcus albus 8 : A--AVNIETADELN--KTFEDRAIDTKRNNDD--KENDRIKSIIEIKCDE-----VYARHLI-----EY-KLWEA--QBGK--CLY-SGETITKEDMLRDLKGL---FEVDHIIPIYSI-SLD---NTINN
187736489 Akkermansia muciniphila ATCC BAA-835 : DRISRVCVGEVKLT--TFSAMDKKIQRELTLRQ--KSHTDVNRKRLKLPK-----ALSNALI-----RKC-RIAMD--MWTV--CPF-TGATYGHLELN---LELHEIYPHF-RQS---NALLS
117929158 Acidothermus cellulolyticus 11B : Q--SIIVELARGAS--ESRERQAEAEARRAHR--KANDRIARLRSAGLS-----VRA-LLEL-----DRL-FLYYL--QMGK--DMY-CGAPISWEN---SLEDHIIPIYSI-SFD---NRHEN
189440764 Bifidobacterium longum DJ010A : V--SVNI EHVRSFP--SVAFARKDKREYKNN--EKRSIFRSLSLQRLADEQME-----KVRESDL-----RRL-ELQR--QNGO--CLY-CGRITFTF---CEMDHIVPKQGVST---NTRTN
283456135 Bifidobacterium dentium Bd1 : Q--SVOIEHVRSFP--SSVAKAKTEYRQGERA--RYRNDLRRLCQ--EGLN-----KIRSDI-----RRW-ESVQR--QNGT--CLY-CGSPITFTF---CEMDHIVPKQGVST---NTRTN
394303286 Mycoplasma bialle S14 : D--KVVIELARELMT--QDQENDLAKIQAQK--SEKIKRERQAEHMLIGRQSPD-----DYLKELN-----DRL-FLYYL--QMGK--DMY-TGEELDIDLRSQ---YDIDHIPOAF-LKD---DSLND
118250660 Eluimicrobium minutum bel191 : C--EIGLETAERLK--KSADRSKLSREQNDN--SNNRNIEYIYRPOQVLIIR-----R-----ENPNRYI-----LKF-ELIJE--QKSG--CPF-CGQGISPNIDNNG---ADIEHLPFIAE-SGD---NGRNN
319957206 Nitratifactor saluginis DSM 16511 : D--EILLETTRDAL--PEKRIEKIDKAMRRE--KALDKIIGKYKEF-----PSIDKRL-----ARKI-QLWER--QRGL--DLY-SGKVINLSQLDGS---ADIEHILPQSL-GGL---STDYD
325972003 Sphaerochaeta globus str. Buddy : Q--EITVELARELK--VGAEKREDIIKQTKQE--KEVALYKCYECPN-----NLDKRYI-----ERF-RLLED--QAFV--CPY-CLEHISVADIAAGR---ADVDFHFRDD-TAD---NSYGN
261414553 Fibrobacter succinogenes subsp. succinogenes S85 : D--EIHLELDGRLK--NPAKERRKMSENTLKN--NHLRIKAMLMFMPNPMGIE-----NVVAPY--NVSQDILRIYENALDNLTKDDKDFDFI---SKISKQAQPSKTDIIR--LYR-KLYKE--QKVR--SPY-TGKTIISFKLPTFA---YIEHIIPIYSI-YFD---DSFNS
60683389 Bacteroides fragilis NCTC 9343 : D--EIRVELARELK--KNAKERELTKSIQTT--KAHEEYKTLIQTEFGLT-----NPTSDI-----LRY-KLYKE--LESCGYK--TLY-SNTYISFKLPSKE---FIEHIIPOAF-LFD---DSFDN
256819408 Capnocytophaga ochracea DSM 7271 : D--EIRVELARELK--KNAQKREYMTQINKAK--LEHQKISELQKQKFI-----NPTSDI-----IRY-RLYQE--LEHNGYK--ELY-TMAPLARDMLKNG---YIEHIIPIYSI-SFD---DSFNS
90425561 Rhodopseudomonas palustris B1sB18 : D--YVHIELARLVG--KSAERKQKQIQDQKQ--VEKAKRERQAEHMLIGRQSPD-----DEL-----LRY-ELAKE--QMKF--CLY-SGDIADPAVANDTR---YEVDFIIPRSV-SFD---DSLND
373501184 Prevotella nana F0438 : T--RVVETARELN--DANTKWDALRYNRIAR--DENEKIKLILKLNPNFTNSISEQDIDKARYIFEQCQTFDFYTDKGVVYKMDI-----KYY-KLWLE--QGGQ--CLY-TGQITINDLTFNNA---FDMHIIPIYSI-SFD---NSDQK
294674019 Prevotella ruminicola 23 : D--KVHIEFTRDAD--DANKRWAIQTQWRENE--KERERCRIEKYIASPS-----DTDI-----LKY-QLWEE--QNHK--CLY-TGDEIRITDFILGNKPK---YDIEHIIPIYSA-GGD---STOKM
365959402 Flavobacterium columnare ATCC 49512 : T--RIHIEARELN--DANKRKGIQDFQENK--KFEBAEIKKILVLEECHD-----V---NPTDDI-----LRY-QLWLE--QKCK--EYEGGNISICDIIGSNPS---YDIEHIIPIYSI-SQD---NSQMN
312879015 Aminomonas paucivorans DSM 12260 : W--CIIHLEARELS--QPAKVRRIETEQAENE--KKQQAERFLDIVGT-----APGGDGL-----LMK-RLWRE--QGGF--CPY-CEEYLNPTLAEFG---AMDHIIPIYSI-SLD---NGWHN
83591793 Rhodospirillum rubrum ATCC 11170 : L--RLVMVETRELK--AGADERKRMIAEQARE--RENAEIDVELRKSDRWM-----ANARER-----QRV-RLAR--QNNL--CPY-TSPTIGHADLDGDA---YDIDHIIPIYSA-GGD---DSLND
294086111 Candidatus Puncicepirillum marinum TMCC1322 : D--EVVIEGRDLP--MAGDKRELERQKQKGR--AKNERARDMLKGLH-----IDSRER-----QKQ-QLWELQAKEP-VDRK--CPF-TGKMSISDLPDSK---YDIEHIIPIYSI-TLD---DSMAN
311608211 Verminephrobacter Eiseniae F01-2 : T--EVVIELARDLK--QSREKQKQOTQRBQADN--KRNIDIKRIAPILTSPE-----RVDRDI-----RKM-LWELANKIDADR--CPY-SGERISATMLLSGA---YEVDFIIPRSV-LKD---DSLND
344171927 Ralstonia syygii R24 : A--QIVVELARELK--AGLEEKRIKQQTANL--EENRIKRLQDAQV-----PDKNEM-----LML-RFEEELG--QGNGLGTPCIY--SGRQISLRMLPSMD---YVDHIIPIYSI-TLD---DSFAN
159042956 Dinoroseobacter shibae DFL1 12 : H--QIVVELARDLK--KSEEQKRAKIRIDTDT--EAKKRSKLELELEI-----ENGRNR-----MML-RWELNDNDMMARFR--CPY-TGTRISAMMFDGS---CVDHIIPIYSI-SLD---DSFPN
288957741 Azospirillum sp- B510 : E--EIVIELARDLK--RSAEDRRDKRQADNQ--KRNERRKRLLSLGE-----RPTPRNL-----LKL-RWEEQGVV--ENRR--CPY-SGETISMRMLLSQ---VIDHIIPIYSI-SLD---DSAN
92109262 Nitrobacter hamburgensis X14 : T--EISIEFTRDLK--LSEQQKAERQERQEN--DNKKAELAKLAFGR--PANPNL-----LKM-RLWELAHDP-LDRK--CVY-TGEQITIERLSDDE---VIDHIIPIYSI-TLD---DSAN
148255343 Bradyrhizobium sp- BTA11 : A--EITVELTRDLK--LSPRRLAEERQEAEN--RKNDKRTSLRLKGL-----PASPNNL-----LKL-RLWDE--QGVASBCPY--TGEAIGLERLSDDE---VIDHIIPIYSI-SFD---DSAN
34557790 Wolinella succinogenes DSM 1740 : D--RVHVELAREIN--TKGEIEDIKESQRKNE--KEREAADWIETSPQV-----PLTRKNI-----LKK-RLYIQ--QDGR--CAY-TGVEIIEKLEPDEGY---CEIDHIIPIYSI-SAD---DSFAN
219563121 Campylobacter jejuni subsp. jejuni NCTC 11168 : H--KIVIELAREVQ--KNSQRAKIEKQENY--KAKDALECEKGLG-----KINSKI-----LKL-RFKE--QRF--CAY-SGEKITIDQLQEK---LEIDHIIPIYSI-SFD---DSYMN
291276265 Helicobacter mustelae 12198 : H--YFHIEFTRDVC--KAKSARQMLEKINKNK--SENDASQLLEVLGL-----FNTYMMI-----LKC-RLWQK--QEY--CLY-SGEKITIDHLQDRA---LQIDHAPFLS-LKD---DSQSN
229113166 Bacillus cereus Rock1-15 : N--TIRFVANDLA--KTYQRKLESTLKKNR--AENKIKTKLLSMGII-----VYK-KLWEE--QSGI--CLY-TGROMLESLFKPGY---SIVNHIIPYK-SFD---DTHYN
222109285 Acidovorax ebreus TSPY : I--AVNIEMARDLS--RPLDERNKVKRAQEFER--DRNDARSEFERDFGY-----KPKAAF-----EKW-MLYRE--QLGQ--CAY-SQQLDQLRVLLDHHY---AQVDHALPYK-SYD---DSKNN
189485225 uncultured Termite group 1 bacterium phylotype RaD17 : D--QINIELATELK--NSKFDRSKIEBQKQKFQ--SQDKLIFEVQELRGM-----TPSSALF-----LKY-RLWRE--QDER--CVY-SGRKISFELDLTGF---YDIDHIIPIYSI-SMD---DSFPN
182624245 Clostridium perfringens D str. JGS1721 : V--RINIELARDLA--KMFDRKILIEKQKERN--ANLDKIRENLRELMDK-----EPTVVEV-----LKY-RLWQK--QRGE--CAY-TQSQPIERLRLSPGY---CEIDHIIPIYSI-SFD---DSLNS
220930482 Clostridium cellulolyticum H10 : Y--MVNIELAREAG--MTRQDRDNLKHEHNNR--KAREKISDLIRQNGR-----VSGSDI-----LKW-RLWED--QGGK--CAY-SGKPIPPCDLLNDSL---YDIDHIIPIYSI-SMD---DSYMN
154255055 Parvibaculum lavamentivorans DS-1 : D--RIIEVDRDVG--KSKREBEIQSIRME--KQKATBDILKNGIA-----NPSRDI-----EKW-LWKE--QGR--CPY-TQDIGNALPFRGR---YEVDFIIPRSV-LKD---NSPN
257413184 Roseburia intestinalis L1-82 : Q--AINIELAREMS--KTFEERRIKGMEKRO--KMNEDVKIQIQL-----GLKS-----LKY-RLWQK--QGI--CMY-SGKTIPELEKFKGY---DIDHIIPIYSI-TFD---DSFAN
116627588 Neisseria meningitidis 22491 : A--RIHIEAREVQ--KSFDRKEIEKRQENR--KREKAAAKFREYFPNFVGE-----PKSKDI-----LKL-RLYQE--QHGK--CLY-SGKINLGRMLEKGY---VEIDHALPFSR-TWD---DSFPN
150622992 Pasteurella multocida subsp. multocida str. Pm70 : A--RVHIEGRELG--KSFKERRIEIQQDENR--TKRESAVQKFKLFDSDFSSE-----PKSKDI-----LKF-RLYQE--QHGK--CLY-SGKINLGRMLEKGY---VEIDHALPFSR-TWD---DSFPN
319941583 Sutterella wadsworthensis 3 1 45B : V--SIFVEENKFFP--SASVADLK---K-----NKRVKDKM---LSEAELKLETRWLKN-----ERF-KKA--SRGT--CPY-TGDRLAGK---GEIDHIIPIYSI-KDARDIYVNAEPN
254447899 gamma proteobacterium HTCC5015 : I--PIIEENQFSP--TABLEIKRGRGS-----AKAKA-----KELGEKSKAGVSKT-----ERI-KTS--SEGI--CPY-TGAPLQGS---GEIDHIIPIYSL-TGRTKTVFNSAN
542961328 Legionella pneumophila str. Paris : I--PIVLEQNRFFP--EESFKIK-GSSS-----DRTLEG-----ALEKQNIQWEKRF-----ERI-INA--SMNI--CPY-KGASLDGQ---GEIDHIIPIYSL-SKKHFGVFNSEVN
331001027 Parasutterella excrementiformis YIT 11859 : I--PVAIEMSNFN--TASITLQYIQLK-----EQKLIKLEIQIQRNEQKWLKSE-----PTQDI-----ERI-INA--SMNI--CAY-TGRPLDQ---GEIDHIIPIYSL-TLKSYSYFNSEVN
34557932 Wolinella succinogenes DSM 1740 : V--PILEQNAFVE--EESLRKSTGSDN--RVINSKDRDKQKLAKAENADRDKDKD-----RRI-KAF--SSGI--CPY-CGDTITGQ---GEIDHIIPIYSL-TLKIYTVFNEGN
118497352 Francisella novicida U112 : I--PIITESNAFEP--EPALADVKGSKL-----DRRKK-----ALERISFENLKKDN-----KRI-KEF--AKGI--SAY-SGANLTGD---DFDGAKEELDHIIPRSH---KYYGTVNDREAN

Motifs : E { HNH \* \*\* \*
#positions selected for tree reconstruction (272) : \*\*\*\*\*



```

303229466 Veillonella atypica ACS-134-V-Col7a : FRHNNTFI -----KV-----RSLNHHHAKDAVLIIVGNVYH-----EK--FTR-----NFRLLFFKNGANR-----TYNLAKPFIYNDVICT
34762592 Fusobacterium nucleatum subsp. vincentii ATCC 49256 : FRMFDFPI -----KV-----REINDTHHAKDAVLIIVGNVYH-----TK--FTE-----KPYRVLQKIKE-----NYDKMFIYNDI
347430778 Filifactor alocis ATCC 35896 : FRKKPLAYI -----KV-----RQVNDYHAKDAVLIIVGNVYH-----KK--FTS-----NPIQWKKNRDT-----NYSLNKVFBEHVTIN
320528778 Solibacterium moorii F0204 : FRNKDKKELP -----KV-----REINDLHHAKDAVLIIVGNVYH-----TK--FTE-----KPFNNIENE-----NYSLKKVVFQFV
291520705 Coprococcus catus GD-7 : FRQTYELL -----KV-----REMDLHHAKDAVLIIVGNVYH-----VK--FTK-----NAANFIRNNDGR-----SYNLKRMFFEDIERE
42525843 Treponema denticola ATCC 35405 : FRNKFDIV -----KV-----REINDPHHADAVLIIVGNVYH-----TK--FTN-----NPNWFIEKERNPKIAD-----TNYNYVFDYDVKRN
304438954 Peptoniphilus duerdenii ATCC BAA-1640 : FRQEFDII -----KV-----RTVNDLHHHADAVLIIVGNVYH-----TK--FTK-----NPLNF1KDKDNVR-----SYNLNMFYVDVVRG
224543312 Catenibacterium mitsuokai DSM 15897 : FRVKNHIY -----KV-----RQVNDYHHAHDVLIIVGGFMR-----NR--YFN-----MHSKAV-----YSEYKMFRRKNNQ
24739809 Streptococcus mitis UA159 : FRKDFELY -----KV-----REINDYHHAHDVLIIVAGKALL-----GV--YQC-----LEPEFVGYDPHFHGHE-----NKATAKFFSN1MMFFIK
313067738 Streptococcus pyogenes S170 : FRKDFELY -----KV-----REINDYHHAHDVLIIVAGKALL-----GV--YQC-----LEPEFVGYDPHFHGHE-----NKATAKFFSN1MMFFIK
16011805 Streptococcus innocuus Clp11263 : FRKDFELY -----KV-----RDVNDYHHAHDVLIIVAGVANTLL-----KV--YQC-----LEPEFVGYDPHFHGHE-----NKATAKFFSN1MMFFIK
116628213 Streptococcus thermophilus LMD-9 : FRKDFELY -----KV-----REINDPHHADAVLIIVAGKALL-----KV--YPK-----LEPEFVGYDPKYNFSE-----RKSATKFFSN1MMFFIK
323463801 Staphylococcus pseudintermedius ED99 : FRKKFDPI -----KV-----RQMDAHHAHDVLIIVAGVYHGAQ-----LA--YFN-----VDLF-----DFN--FKWEKV-----REKWKALGFNTKQSRLEF
352684361 Acidaminococcus intestini RYC-MR95 : FRHEPGLV -----KV-----RNINDLHHAKDAFLIIVGNTYH-----ER--F-----NRKRWFMVYVSVTKT-----NRKRWFMVYVSVTKT
302336020 Olsenella uli DSM 7084 : LREAAGLV -----KV-----REANDPHHADAFLIIVAGVYHGAQ-----KR--HPS-----VYDNP1GLARIMEDYARMQ-----AREYKSHCLLQGTQVINS
369839953 Oenococcus oeni DSM 17330 : MRKYVDPI -----KV-----RDVNDYHHAHDVLIIVAGVYHGAQ-----KR--HPS-----VYDNP1GLARIMEDYARMQ-----AREYKSHCLLQGTQVINS
310267738 Bifidobacterium S17 : MRKYVDPI -----KV-----RDVNDYHHAHDVLIIVAGVYHGAQ-----KR--HPS-----VYDNP1GLARIMEDYARMQ-----AREYKSHCLLQGTQVINS
259509199 Lactobacillus rhamnosus G3 : LRKDFEFP -----KV-----RDVNDYHHAHDVLIIVAGVYHGAQ-----KR--HPS-----VYDNP1GLARIMEDYARMQ-----AREYKSHCLLQGTQVINS
300361537 Lactobacillus gasseri JV-03 : LRKHLNLY -----KV-----RQVNDYHHAHDVLIIVAGVYHGAQ-----KR--HPS-----VYDNP1GLARIMEDYARMQ-----AREYKSHCLLQGTQVINS
169823755 Finegoldia magna ATCC 29328 : LRKDMNTL -----KV-----RQVNDYHHAHDVLIIVAGVYHGAQ-----KR--HPS-----VYDNP1GLARIMEDYARMQ-----AREYKSHCLLQGTQVINS
47458868 Mycoplasma mobile 163K : LRKQIAFV-GIKNNKTEREWRKPEGFK -----SI-----NSNDFLIEEKGKNDVKDVLKDRSPGHHAEDAVYFIIISQYFR-----SPKRIER-----LNVNRYKE-----YLDLLEKNNIKFK
284931710 Mycoplasma gallisepticum str. F : LRKNFDD-----SSYAK-----K-----DRDKN1IHAVDASIIISFNPTK-----TL--FNOL-----TQFADYKLFKN-----TDGSMKIDPKTGVV
363542550 Mycoplasma ovipneumoniae SC01 : FRKPVQKNGPNENLN-----NKPEKIE-----K-----NRENNHHADAIVAIIGKNNP-----QI--ANLLTA-----DNKTKRFLH-----DENYKNIIE--TQEL
394332386 Mycoplasma PG 14 : LRKDFEFP -----KV-----RQVNDYHHAHDVLIIVAGVYHGAQ-----KR--HPS-----VYDNP1GLARIMEDYARMQ-----AREYKSHCLLQGTQVINS
71894592 Mycoplasma synoviae 53 : LRKSMWRK -----N-----QVVRFNPKWKKRDQFPFHAVDASIIIAIFSLKLTLYL-----NK--LRV-----EYDVFQVQREDC-----RVLNKTDEQVKKAD
238924075 Eubacterium rectale ATCC 33656 : MRCNLKL -----KV-----RQVNDYHHAHDVLIIVAGVYHGAQ-----KR--HPS-----VYDNP1GLARIMEDYARMQ-----AREYKSHCLLQGTQVINS
116627542 Streptococcus thermophilus LMD-9 : LRKHGIE -----KV-----KTRDTHHHAHDVLIIVAGVYHGAQ-----WKK-----QKNTLVSYEDQ-----LIDLLETGELISDDEY
315149830 Enterococcus faecalis TX0012 : LRKKGAD -----KV-----KTRDTHHHAHDVLIIVAGVYHGAQ-----WKK-----QKNTLVSYEDQ-----LIDLLETGELISDDEY
315659848 Staphylococcus lugdunensis M23590 : LRKVKFK -----KV-----RHHYKHAHDVLIIVAGVYHGAQ-----WKK-----QKNTLVSYEDQ-----LIDLLETGELISDDEY
160915782 Eubacterium dolichum DSM 3991 : FRKINLK -----KV-----RQVNDYHHAHDVLIIVAGVYHGAQ-----KR--HPS-----VYDNP1GLARIMEDYARMQ-----AREYKSHCLLQGTQVINS
394332386 Mycoplasma PG 14 : LRKDFEFP -----KV-----RQVNDYHHAHDVLIIVAGVYHGAQ-----KR--HPS-----VYDNP1GLARIMEDYARMQ-----AREYKSHCLLQGTQVINS
310780384 Ilyobacter polytrophus DSM 2926 : LRARMLN -----KV-----RENDLHHADAIVAVDTQKAI-----NR--ISN-----ISYKELKNCKDVP1SEYHA-----LDETEYVFEEVRLT
325677756 Ruminococcus albus 8 : FRWRV LN-----EK-----TWGRYDKA-ELKLLTYLHADAII IANCRPEVYVVLAGEKLLKLN-----MHQAKRIT1PEYEQSKKACIDNLKYLFRMDTRTEAKLLSGSGKTD
187736489 Akkermansia muciniphila ATCC BAA-835 : VRKAVDF -----KV-----FKELCPAADDPSGKILKENRSLTHLHLDACVGLIPIYIP-----AH-----LAD-----HNLRLVLMRRI-----HNLRLVLMRRI
117929158 Acidothermus cellulolyticus 11B : ARRWDLS -----IE-----FSRVAIFAQSTTKRLDRHHADAIVAVDTQKAI-----NR--ISN-----ISYKELKNCKDVP1SEYHA-----LDETEYVFEEVRLT
189440764 Bifidobacterium longum DJ010A : ARRAAGIE -----QR-----IHF1GQQSKTRLDRRHHADAIVAVDTQKAI-----NR--ISN-----ISYKELKNCKDVP1SEYHA-----LDETEYVFEEVRLT
283456135 Bifidobacterium dentium Bd1 : ARKASGIE -----QR-----IHFAGEKTKELDRHHADAIVAVDTQKAI-----NR--ISN-----ISYKELKNCKDVP1SEYHA-----LDETEYVFEEVRLT
394332386 Mycoplasma PG 14 : LRKDFEFP -----KV-----RQVNDYHHAHDVLIIVAGVYHGAQ-----KR--HPS-----VYDNP1GLARIMEDYARMQ-----AREYKSHCLLQGTQVINS
187250660 Elusimicrobium minutum Bel191 : LRMAWGL -----GL-----MIPFAKQLITKEESEPNKDNVSNKIRLDRHHADAIVAVDTQKAI-----NR--ISN-----ISYKELKNCKDVP1SEYHA-----LDETEYVFEEVRLT
319957206 Nitratifactor saluginis DSM 16511 : TRSLGK -----KV-----SRETFHHAHDVLIIVAGVYHGAQ-----KR--HPS-----VYDNP1GLARIMEDYARMQ-----AREYKSHCLLQGTQVINS
325972003 Sphaerochaeta globus str. Buddy : LRKANWL -----GI-----DSSLGRHWSKDAITSPMKRRDRHHADAIVAVDTQKAI-----NR--ISN-----ISYKELKNCKDVP1SEYHA-----LDETEYVFEEVRLT
261414553 Fibrobacter succinogenes subsp. succinogenes S85 : LRKDWGN -----SV-----LGHNTDQTPAKSRDRHHADAIVAVDTQKAI-----NR--ISN-----ISYKELKNCKDVP1SEYHA-----LDETEYVFEEVRLT
60683389 Bacteroides fragilis NCTC 9343 : LRBDWGL -----DV-----MKELNWEKYLKALGVEYEDRDKGRKVTYINWTKRDRHHADAIVAVDTQKAI-----NR--ISN-----ISYKELKNCKDVP1SEYHA-----LDETEYVFEEVRLT
256819408 Capnocytophaga ochracea DSM 7271 : LRKAWGL -----GL-----KQ-----DKRVEDDRHHADAIVAVDTQKAI-----NR--ISN-----ISYKELKNCKDVP1SEYHA-----LDETEYVFEEVRLT
90425961 Rhodospirillum rubrum ATCC 34411 : LRKAWGL -----GL-----LGLGKRNDRHHADAIVAVDTQKAI-----NR--ISN-----ISYKELKNCKDVP1SEYHA-----LDETEYVFEEVRLT
373501184 Prevotella micans F0438 : FRKILGL -----GI-----FRKIDRSLHSHHADAIVAVDTQKAI-----NR--ISN-----ISYKELKNCKDVP1SEYHA-----LDETEYVFEEVRLT
294674019 Prevotella ruminicola 23 : FRKMGW -----ES-----FIDENWKKHYK--DKDRDKHTHTTDAITACMPKDYK-----DL--LAH-----AWRLEQDKKAAKVLIE-----QAKPKFTKEDIKI
365959402 Flavobacterium columnare ATCC 49512 : FRKMGW -----ES-----FIDENWKKHYK--DKDRDKHTHTTDAITACMPKDYK-----DL--LAH-----AWRLEQDKKAAKVLIE-----QAKPKFTKEDIKI
312879015 Aminomonas paucivorans DSM 12260 : LRKQWGL -----KV-----RKNGLDHHADAIVAVDTQKAI-----NR--ISN-----ISYKELKNCKDVP1SEYHA-----LDETEYVFEEVRLT
83591793 Rhodospirillum rubrum ATCC 11170 : LRLAADIT -----INQ-----PGAPARDLLTPRDLALDDTAARFRLDGLTPPLAKAVEGAQRLAALGRSRVADAGLADLGLTLASLGGGKNRDRHHADAIVAVDTQKAI-----NR--ISN-----ISYKELKNCKDVP1SEYHA-----LDETEYVFEEVRLT
294086111 Candidatus Puncicepstrillum marinum TMCC1322 : LRQFWGL -----SI-----LRGHNTDQTPAKSRDRHHADAIVAVDTQKAI-----NR--ISN-----ISYKELKNCKDVP1SEYHA-----LDETEYVFEEVRLT
121608211 Verminephrobacter eisenaei EF01-2 : LRKQWGL -----KV-----LGLGKRNDRHHADAIVAVDTQKAI-----NR--ISN-----ISYKELKNCKDVP1SEYHA-----LDETEYVFEEVRLT
344171927 Ralstonia syygii R24 : LRKAWGL -----RV-----LDGMEQGRVAVKRRDRHHADAIVAVDTQKAI-----NR--ISN-----ISYKELKNCKDVP1SEYHA-----LDETEYVFEEVRLT
159042956 Dinoroseobacter shibae DFL12 : LRHWGL -----SL-----LSDAGRQVAKNRRDRHHADAIVAVDTQKAI-----NR--ISN-----ISYKELKNCKDVP1SEYHA-----LDETEYVFEEVRLT
288957741 Azospirillum sp- B510 : LRHWGL -----AI-----LAEADGPPVPAETLDPSAPAKNRDRHHADAIVAVDTQKAI-----NR--ISN-----ISYKELKNCKDVP1SEYHA-----LDETEYVFEEVRLT
92109262 Nitrobacter hamburgensis X14 : LRKQWGL -----DL-----LPSDNYAGVQDKAEFLASDDMEFSGVNKRDRHHADAIVAVDTQKAI-----NR--ISN-----ISYKELKNCKDVP1SEYHA-----LDETEYVFEEVRLT
148255343 Bradyrhizobium sp- BTAi1 : LRATWGL -----DL-----LPGSDRA-AKSRKDRHHADAIVAVDTQKAI-----NR--ISN-----ISYKELKNCKDVP1SEYHA-----LDETEYVFEEVRLT
34557790 Wolinella succinogenes DSM 1740 : LRQWGLE -----SK-----DRSSTHHAHDVLIIVAGVYHGAQ-----KR--HPS-----VYDNP1GLARIMEDYARMQ-----AREYKSHCLLQGTQVINS
219563121 Campylobacter jejuni subsp. jejuni NCTC 11168 : LRHWGFS -----EK-----DRNHHLHHAHDVLIIVAGVYHGAQ-----KR--HPS-----VYDNP1GLARIMEDYARMQ-----AREYKSHCLLQGTQVINS
791276265 Helicobacter mustelae 12198 : MRSPGQV -----EK-----NRDHLHHAHDVLIIVAGVYHGAQ-----KR--HPS-----VYDNP1GLARIMEDYARMQ-----AREYKSHCLLQGTQVINS
229131366 Bacillus cereus Rock1-15 : LHSRWGN -----KN-----SREYLNHHAHDVLIIVAGVYHGAQ-----KR--HPS-----VYDNP1GLARIMEDYARMQ-----AREYKSHCLLQGTQVINS
222109285 Acidovorax ebreus TPSY : LRARWGL -----KV-----RQDSDRHHADAIVAVDTQKAI-----NR--ISN-----ISYKELKNCKDVP1SEYHA-----LDETEYVFEEVRLT
189485225 uncultured Termite group 1 bacterium phylotype RaD17 : LSYNWGMS -----KV-----REESYFHHADAIVAVDTQKAI-----NR--ISN-----ISYKELKNCKDVP1SEYHA-----LDETEYVFEEVRLT
182624245 Clostridium perfringens D str. JGS1721 : LRSRWGL -----KV-----REDDGKHHADAIVAVDTQKAI-----NR--ISN-----ISYKELKNCKDVP1SEYHA-----LDETEYVFEEVRLT
220930482 Clostridium cellulolyticum H10 : LRSRWGL -----KN-----REESDHLHADAIVAVDTQKAI-----NR--ISN-----ISYKELKNCKDVP1SEYHA-----LDETEYVFEEVRLT
154250555 Parvibaculum lavamentivorans DS-1 : LRKLWLN -----NT-----LADGGEKTRDRHHADAIVAVDTQKAI-----NR--ISN-----ISYKELKNCKDVP1SEYHA-----LDETEYVFEEVRLT
257413184 Roseburia intestinalis LI-82 : LRKRWGL -----QK-----NRETDTHHAHDVLIIVAGVYHGAQ-----KR--HPS-----VYDNP1GLARIMEDYARMQ-----AREYKSHCLLQGTQVINS
218767588 Neisseria meningitidis Z2491 : LRQWGL -----KV-----RAENDRHHADAIVAVDTQKAI-----NR--ISN-----ISYKELKNCKDVP1SEYHA-----LDETEYVFEEVRLT
15602992 Pasteurella multocida subsp. multocida str. Pm70 : LRSRWGL -----KA-----RNNRHHADAIVAVDTQKAI-----NR--ISN-----ISYKELKNCKDVP1SEYHA-----LDETEYVFEEVRLT
319941583 Sutterella wadsworthensis 3 1 45B : IKNLANKI--REELQNWCTTNNRHLFQAQATNV-----SDAKNRLKLAQNQDFEK-----PDIQPIASHSIDALCSFVAGSAD-----AERDQNGFDYLDGKTVLQ-----LYPQCEVHILQAKQBEKSHFDVS-----ALFK
254447899 gamma proteobacterium HTCC5015 : AKI1ASKL--AEHL-----DKQRDYTLSAHQIDP-----WVSVKQRKMLASAEP1WAK-----KDPQPAASHVVDVCTFLALEAO-----PHTASRLKTIISSTFEEKTGWRSALIPDLKVDALDRPKYRKYNGT-----SLFK
54296138 Legionella pneumophila str. Paris : GRQIMFPL--STLA-----DSKQLQLEFSLKQITA-----EVSVDHREKLESLKQPKFLV-----SRQSFPSHAIADTLTMSIGLE-----FPQFQELDNSWF1NH-----LMPDEKVNPNRSKIKYKNPNISST-----PLFK
331001027 Parastutterella excrementiformis YIT 11859 : VRS1FSKV--RQLAAMTQCTQNELLIDASIVPA-----ADSSMRKFPALYEPFRK-----PKVQYASHSIDAMCIYLAACSDFPK-----PKVQFASHSIDAMCIYLAACSDFPK-----LFTQSCVQIANTPRFSDKNLST-----PIFK
34557932 Wolinella succinogenes DSM 1740 : AKI1QKLL--TKML-----PNRHLSEFLILADA-----TEVSELRQVYAKNPLLAK-----AEKQAFPSHHAIDAVAFYQKVPKDTGP-----NADEVKALAMDSDPNASNE-----LTKGLSTQKLEKMKKSGDYGKQKMFEPKQ-----SIFG
118497352 Francisella novicida U112 : AEVLNANI--YLRA--KKNLNTDKISFDYGIPTGNG-----RG1AEIRQLYEVKSDS1QAYAK-----GDKPOAYS1HLIDAMCFIAAEDHNDGSG-----LEIDKNYS1LPLKNTGVEV-----FTKD1FSQ1KIT1DNFSDK--KLWRK1EMLFNGHTQKTR

```

```

Motifs : _R * * RNaseH_III }
#positions selected for tree reconstruction (272) : *****

```

303229466 *Veillonella atypica* ACS-134-V-Col7a : NAQD-----GKAW--DVKTSMTVK-KM-----MANSNDR--VTRRLLEQ-----SGALADATI-----YKASVAAKADGAYIGMKTKYSVFD--VTKYGGMTKIKNAYSIIVOYTGKK---  
34762592 *Fusobacterium nucleatum* subsp. *vincentii* ATCC 49256 : ----KNTV--KNMW--DKENSLIVKRM-----DKNTV--TRFPIKE-----KGLFNPNP-----IKGQTSNEIISIKPKLVDGDKNL--NKYGYYSLKAAYVIVVEHKNK--  
374307738 *Fillifactor locis* ATCC 35896 : G-----EVTV--EKCTYHEDN-YY-----DGGLDRIRIKVERNDIL--IYEYAYCE-----KGFENATI-----QMKNGSYVSLKGLD--VKYGGYFSAMTSYFSLIF--  
320528778 *Solibacterium moorii* F024 : ----DRII--FGAW--DAKSTPTIYIKY-----MARNPLI--IAPAYEV-----KGLDFYQI-----TIKPKNSGSKQIPKQGD--TKYGGYKNSLAPFAYE--YKAKAR--  
291520705 *Coprococcus catus* GD-7 : G-----EIAW--KAGMKGSIYTKK-----VMQNNIL--VTRKAYEV-----KGLDFDQI-----MKKGQVPIKGNDRGLAD--IKYGGYKNAQTYFVMLSLDKGK--  
42425843 *Treponema denticola* ATCC 35405 : N-----ITAW--EKGKTIITVK--DM-----LKNTPII--YTRGAACK--KGLDFNQTI-----MKGLGQPLKLEGGPFSN--ISKYGGYKNSYAAITYLIEYEK--  
305443954 *Pectoniphilus duerdenii* ATCC BAA-1640 : S-----YTAW--IADDSGEVNAKTIK--K-----VKRELEGGNYR--FTRMSYIG--TGGLYQNLN-----MRKGGQIPQKENTKAG--IKYGGYKNSYAAITYLIEYEDGKAG--  
224543312 *Catenibacterium mitsouaki* DSM 15897 : KRKKGDFVNSMNYVYEDGKLIWV--PDLINEKCK--FYKDYC--CTKLDQK-----KGFNLNIVY-----LSDNAHADRGVTKAVVPMNRSRSD--VHYGGYSGLOVTVLIEIQKKGK--  
24379809 *Streptococcus mutans* DA159 : ----DDVR--TDKNGEIIW--KDEBHSINIKNVLSYQVNVK-----KVEEQ-----TGGFSKE-----SILPKNSDKSLIPKTKFYFD--NKYGGYDPSIIVYSLIVLADIEKQ--  
15675044 *Streptococcus pyogenes* 1370 : --LANGE--TRRPLLETRNGE--EVMW--SEEDKILYK--VM-----DKGRDFATVYR--LSMPCQVYTK-----KTEVQ-----SILPFRKDKLARKVYV--NKYGGYDPSIIVYSLIVLADIEKQ--  
160181805 *Listobacterium elii* 11262 : ----DRII--DENGE--ELW--DK--KYLK--VMYRQMVYK-----DKYVYK-----KGLDFYQI-----TIKPKNSGSKQIPKQGD--TKYGGYKNSLAPFAYE--YKAKAR--  
116628213 *Streptococcus thermophilus* LMD-9 : --LADGR--VIERPLLEVNTEGSEVW--NKESDLATVRRVLSYQVNVK-----KVEEQ-----NHGLDRGKPKGLFN-----ANLSSKPKNSNENLVGAKAY--LD--PKYGGYAGISNSFTVVGTEIKG--  
323463801 *Staphylococcus pseudintermedius* ED99 : : FPKKLEKM-----EVQGERL-----ISKILDMNHFKNYSR--K-----KLANI--PQGFYNG-----TAVSPKTAELKYSNKSIN--S-----EYVYKGL--TPYQTVVVALKSNYKGG--  
352684361 *Acidaminococcus intestini* RCY-MR95 : --LFTHSIK-----NGNF--VAVNGEEDLGRVIMKLKQNTIHTFTRP-----SDFRK-----DIQPLKASTGLVPRKAG--LD--VYVYKGL--TPYQTVVVALKSNYKGG--  
302336020 *Olsenella ulii* DSM 7084 : FLSGG--FDEBTEGEIFK--DDWDAKEVGEIRVNLNCRQCFISRMPPV-----EGDTR-----YGGYRWG-----ETIYSYKPKGHKHEIPLKQG--LD--PNLYGGYDLSLIVYLYEASDVSS--  
366983953 *Oenococcus oeni* DSM 17330 : GFVVSGMRNAAPOKRLNPTGTEIPEENADWSI--ADDLVLKHMFRKTIIVTR-----RLKQD-----YKQYDES-----RYSPLVLDHAKSKASINFQK--KP--VLYGGYSGSAFAYALI--  
110286728 *Bifidobacterium longum* S17 : : RQDQEQKRVNRTFG-----EVMW--SEEDKILYK--VM-----NYRKMV--VTQVGDQ-----FGALYDTR-----YAATDPRKGLLARKVYV--NKYGGYDPSIIVYSLIVLADIEKQ--  
259509199 *Bifidobacterium rhamnosus* GJ : : HAKKNIKAKDGG--EIVW--DKERDIFELD--RE-----NYFKML--ITEHYVEF-----TADLFKQTI-----YAAKSKERGSGKQIPKQGDY--TYVGGYDPSIIVYLYEASDVSS--  
300361537 *Lactobacillus zhangou* VJ-003 : : NEFI-----SQIFENKSNDSIISLETKKVV--FKDKDIIIEKHAYW--YKYMVLSR-----VTRFDQEM-----FMTIVVPRLSRDRSKSRNLISKMDP--PKYGGYDPSIIVYLYEASDVSS--  
169823755 *Finegoldia magna* ATCC 29328 : G-----KVITPTEKGRKLIIVDTL-----NPKSVL--ISNEHSYK-----KGLDFENATI-----AGKKDYKKGKLIPLPKDRDLQD--VSKYGGYKNAQTYFVMLSLDKGK--  
47458868 *Mycoplasma mobile* 163K : 47458868 *Mycoplasma mobile* 163K : : KASFP--DNFLINLALD--EL-----NEKLNQMR--FSRMVITK-----KNTQLFNETL-----YSKDYKQKNTIKKVEKLNLDNRDKI--KKIEFFEDDKLEKMLKHFNH--  
284931710 *Mycoplasma gallisepticum* str. F : : TEVT--DENW--KQIRVNRQVS--E-----AKVIERKYQDSNIRKAR--YSRKLBNK-----TNSLFDNVTYSAKKVGEDQIKRKNLKTLDIHSAKENKNSKVRQVYKRLVNSLNL--NDKLADLPAEKDILMYRANPWVINA--  
363542550 *Mycoplasma ovipneumoniae* SC01 : : KIKI--K--FEVDKIAKVE--DL-----K--IKIQEKYEAHKHTPAK--FSRKTPII-----LNGGLSDIITLYGFKYDEKDK--YFKIHKVIVT--SKNEKLYFENPFGKADGSEBYTLV--  
394393286 *Mycoplasma pneumoniae* PG 14 : : KELK--KEW--TKIKNLEK--VM-----AKEIEEVLID--LDEYFV--FSRKNRQK-----TKGLNBTIETIGIATKTDGDTW-----TYGKESKILD--SKDYLFRKGLLARKVYV--NKYGGYDPSIIVYSLIVLADIEKQ--  
71894592 *Mycoplasma synoviae* 53 : : : KDWKDHQNFILKRENAIEI-----KNVNLNVDPOQNV--YSRKNYK-----LANTQLFNETL-----YQVKEFENNFKYKLVNLSRDKLRFPLIL--EDLNESEBKNKNKNGSRRKLLA--  
238924075 *Eubacterium rectale* ATCC 33656 : : DYLY--GCKW--AMINREVKA--K-----EKNV--MHYVMRQK-----SBRNCLNGT-----RGTEYDQYKQYIKMLDIRTEKQIVFA--KLFASFKKDSBRERLWYLN--  
116627542 *Streptococcus thermophilus* LMD-9 : : KESVF--KAPY--QHVFDTLKSX--EF-----EDSIL--FSYQVDSK-----FNRKISDATT-----YATRQAKVGKKADETYVGLKIDDIYQDGYD--APMKIYKPKSFLMYRH--  
315149830 *Enterococcus faecalis* TK0012 : : QVKN--QVKN--PNF--RE--QL-----KPVNLHPRKL--FSHQVDRK-----ANRKLSDATI-----YSVREKTEVTKLGGKQITDYTEYIGKIKDYD--DWEAFKPKQDKMLDKL--  
315659848 *Staphylococcus lugdunensis* M23590 : : : EMFIIIPKQVQ--DI-----KDFRNF--YSHRVDDK-----PNRGLINDTL-----YSTRKDNSTYVQTIKDIYAKDN--TTLKQFDPKSPKFLYQH--  
160915782 *Eubacterium dolichum* DSM 3991 : : YY-----DTRY--FAFIASLKA--I-----KVRK--FSHKIDTK-----PNRVADETI-----YSTRVLDGEEKVVKYKDYV--DPKFTLAEIILNAYQEKYALMALH--  
160915782 *Eubacterium dolichum* DSM 3991 : : : AEAQRMDADLNKIFNFG--FLPW--LDFEKLRLYK--VM-----NPFVBMKSRSNYITPIELAKLFV--VRLANRQ-----LSCALHEFTF-----RSALKFDEKGLVLSRVSITLKNKGGV--ATGKGLRVD--EFCDFEKLRLYK--  
310780384 *Ilyobacter polytropicus* DSM 2926 : : RP-----PMPW--SGDPLEKRLSEMPREFFYN--L--LSDKRYLQWYVE--GPIEKILVY--YSRMPRG-----VKGQAQHTI-----RKMKLSINQIYVS--KPLNSIKLXDLKMQGRDT--  
325677756 *Ruminococcus albus* 8 : : PIIPLNDSSEVDLKNVIEQFW--K-----KDKDKKSCX--EL-----YRENASLYGDPKPKFASLSMPV--ISLKDPHG-----YRGTITGEEA-----IRVKEDIGKLIKLRKRSISEITA--SINISYTD--  
187736489 *Akkermansia muciniphila* ATCC BAA-835 : : : PEKL--L--PQVRFVAN--QRHVIND--DGRMRLRD-----DGRMRLRD-----SASLKENIRLEQMEQRVGHV--ADMGGALLETMQRVLSV--  
117929158 *Acidothermus cellulosilyticus* 11B : : TEEPQSPA--YRQW--KESCSGLGDLIS--S-----TAARDSIA--VAAPRLRL-----PTGALHEFTL-----RAFSEHTVGAWKGAELRRLE--PEVYAAFLATDPPGGFLKVPSP--  
189440764 *Bifidobacterium longum* D010A : : : YES--LNDRIAV--MQSQRYVL-----LNDRIAV--MQSQRYVL-----HPLEKVPVLSGAMSADLIRRAST--PALWCAKLTLPDDEKGL--  
283456135 *Bifidobacterium dentium* Bd1 : : KTR-----FKEW--DMDMNLDDLLD-----ALDSRIVPV--TRQRMSL-----GNSQAHAATI-----RMRKRVELFSPMDADLIRRAST--PALKYCALTR--LPEYSPKGL--  
39232679 *Bifidobacterium denticolus* NCTC 13129 : : : RAA--WEP--QFMEKRLVYK--VM-----DLADRELV--MGLWV-----ARGKAEDATI-----KQREIIEBIRFEPKVE--KLMDLKEIPIKPIQVSPDRL--  
178205660 *Eluimicrobium minutum* bel191 : : : LSKILLDPN--NIVW--ENIDADLESF--ES-----SVKTKANAF--ISVHSDS--DNGLRVKGTW-----YKIFSERGYTITTYKLSAKLITDPPQ--KTKPKDFLITALLKFKGRESMNEKI--  
319597206 *Nitratifactor saluginis* DSM 16511 : : TLADYI--R9HMDTIRS--DEAF--RFMSKGEES--LF-----YRDMDTIRS--ISYVDDK-----PLSASSHGTV-----YSSRHVPTLRKILAEFDSLNVDIRKHTL--EEMFKRYDKIIBALHLRIGNT--  
325972003 *Sphaerochaeta globus* str. Buddy : : : MIPY--PGYASPNLSFEA--K-----QRELFPRKILBFMDLHAF--VSMKTDND-----ANGALKDTV-----YSILGADTQGEDVFWVKKIKDI--GVIGDYVEVAISGRIT--  
261414553 *Fibrobacter succinogenes* subsp. *succinogenes* S85 : : : IDGKEREVAKEF--LKPDL--DFSFSDSKNILEN-----IIVSFKQNRVINKTRKKG--FLHFDENGK--KTFIKQKGGDSWAKRILSHEDTI--FGENLNRKRVSNLNEAKVPERVNLKLRKLE--ELKNNLPPKAFAGNKLSDRQIWLDEKQ--  
60683389 *Bacteroides fragilis* NCTC 9343 : : : A-----PMLD--REFRAEAKKHLE-----TLISIKAKNKVITGNKTRKKG--VMNKMOQT-----PGRQLHLETI-----YSGKQYLTKEEKNVNASFDMRKTGVSASAYRDLKRLYV--DNDNPKKAFAGNKLSDRQIWLDEKQ--  
256819408 *Capnocytophaga ochracea* DSM 7271 : : : NGKNKRVFE--PIP--NFRQVAKKHLE-----IPISHKANNKVVTKNPKP--AGT--DRQQIITL-----PGRQLHLETI-----YSGKQYLTKEEKNVNASFDMRKTGVSASAYRDLKRLYV--DNDNPKKAFAGNKLSDRQIWLDEKQ--  
394255961 *Rhodospudomonas palustris* B18b18 : : : DIF--HC-----RQFADRVRTVYGSST-----MQFI-----ARGKAEDATI-----KQREIIEBIRFEPKVE--KLMDLKEIPIKPIQVSPDRL--  
373501184 *Prevotella micanis* F0438 : : : EKK-----DCRV--GRVNDLDF--E-----INENIIV--SHHTYQDA-----LTPAHRLEKR--GKIVGKHEHW--QDGLSBEIHK--ASYGAIQTFADKANGKYLKMDQQAQI--  
294674019 *Prevotella ruminicola* 23 : : : PTF--DKPW--PSFVINDI--KH-----QDLELI--AHYAKND-----KFEKTKNLKRDK-----GRIIRDKFNGLKMQKSDTSNSLHN--DKFYGALIPKYSYVRYTNI--  
365959402 *Flavobacterium columnare* ATCC 49512 : : : ETEILVSHFTPNVKKQ--SKSILKNRKKVYVKNL--EL-----PVNFKNIEGKDYFKLFPDSKI--LVKIPKK-----EKQDITFYEBEL-----KNYLVGEGKDYFKINTGTTFYKIPFNQDITRGLSLHQ--ETTYGALKLPDIETTKKPLTHDGGF--  
312879015 *Aminomonas paucivorans* DSM 12260 : : : NGF-----SLPY--PAFRESVLARLPV-----TREIILLRDLQGGVYDEAFRNLRPVE--VSRAPSR-----LRGKAHMETL-----RSPKWKDPEGPRSHQ--RIPDLKLNLEKLEMMVKLR--  
83591793 *Rhodospirillum rubrum* ATCC 11170 : : : TNF--EPPY--PTFRABVMQK-----WDHII--PSIRPAHR-----DQGLSHAATV--PGVNRNPARVLVORVPEKLFV--DANAKPLPAKIAIIDGFA--  
294808611 *Candidatus Puncicepirillum marinum* TMCC1322 : : : GR-----IDPW--DGRFDEVKH-----IDAI--VSHRPRK-----SQCALINDTA--YGVHVAHAGSTVHRVP--GIREDG--RIRKPKAKSADI--  
121608211 *Verminephrobacter eiseniae* EF01-2 : : : DM-----LLPW--PTYDABEVA-----URHTR--VSHRPHG-----FEGAMKKTATGHIRD-----YGVHVAHAGSTVHRVP--GIREDG--RIRKPKAKSADI--  
344171927 *Ralstonia syygii* R24 : : : DM-----PTPW--PNFLDNRVA-----VAVCV--VSHKPDG-----PEGOLINDTA--YGVHVAHAGSTVHRVP--GIREDG--RIRKPKAKSADI--  
159042956 *Dinoroseobacter shiba* DFU 12 : : : ARDT--PPPW--EGRDRLVRR-----LDRII--VSHRPHG-----RIDHAAKQRDRSTAGQLHQETA-----YSIVDDHVASRDLDS--LKPALDLEPGRSQVQ--  
288957741 *Azospirillum* sp- B510 : : : RVLEGFK--EPWP--DGRFRELRR-----ARTIV--VSHRPHG-----IGGALKHETA--YGVDPPEEGFNLVV--RKPIDGLSKDEINSVR--  
102109262 *Nitrobacter hamburgensis* X14 : : : VI-----LEKM--PTMRDDLKAA-----LEKMV--VSHKPDG-----IEGLHEDSA--YGVKPLDALTGLEEAGNLVY--RKAIESLSEKEDR--  
148255343 *Bradyrhizobium* sp- BTA11 : : : L48255343 *Bradyrhizobium* sp- BTA11 : : : LLPW--PTFRIDLETR-----LKAML--VSHKPDG-----LQARLHEDTA--YGVHVAHAGSTVHRVP--GIREDG--RIRKPKAKSADI--  
34557790 *Wolinella succinogenes* DSM 1740 : : : L-----AVPL--ANFRDAVEAETRI-----ENTETVKGVEVVKRLL--ISRFRAR-----VGGQAHEQTA-----KPYFRIKQVKNKWRPLAP--  
220930482 *Cellulolyticum* H10 : : : F-----PEFP--SQRKVLK-----SLEW--PMSNKKIQES-----IQNII--FSHVSHK-----VTGELHQETV-----RTKEFY--YQAFGG-----  
257413184 *Roseburia intestinalis* LI-82 : : : F-----PEPW--KFSFIELEARISP-----QVRDLIKLNLDSYLDVILHLKPVF--ISKPRPK-----VGAHKSTI-----RSLIGINEIKVTICITKRLPID--PNDNGPMDYKT--  
218767588 *Neisseria meningitidis* 22941 : : : ARQH--PEPW--TFHAHLKARLFT-----DDLAAALREDMQRLGYSYTTEDLGRILTF--VSRAPQR-----SGGAVHKETI-----YAQPESLKQGGVIEKLLTSLK--QDFKLLNPENSDHVFPHR--  
150262992 *Pasteurella multocida* subsp. *multocida* str. Pm70 : : : GEIISY--HEPEW--AYFRQVNVIRF--DNHDP-----VTLKEMLPDRQANHQVQPLF--VSRAPTR-----MSGQHMETI-----KSAKL--DQGVSLV--RIPQLKPLNEMLVN--KER--  
319941583 *Sutterella wadsworthensis* 3 1 45B : : : GEIYAEQFLPFTLNE--KIWIQYE--TINAKGERGCAIEVSGKQPKLEMLLAPPFNK--PVGDLSAHTYRILKPKPAYEFLAKAAL-----QPLSABEKRLAAL--LNSIHFTQKTELRAKFSF--DSGK--  
254447899 *gamma* proteobacterium HTCC5015 : : : DGIYARFRLILIDEN--GLMAGYD--IDNSLKAKGADVVESSLSPFLFK--GEEVGAQSLSDQERIDGRVLYMSIDKVKAFDYL-----QEVKGEKDLAAL--LNSIHFTQKTELRAKFSF--DSGK--  
54296138 *Legionella pneumophila* str. Paris : : : DSIYARFIPVWVWGE--FPAIGS--EKDLFEK--PMSKELFTLKYSTNKPQSGSLQELQAKSKAWL-----YFPIKRLA--LFLHLYHFKIEVTPDPTVCHPINSRLRY-----TKES--ITVILKEPMLVLSFPESSKNVLLSFPKIALPAT--  
331001027 *Parvibaculum lavamentivorans* DS-1 : : : : ETIYARFLDVISRG--EFIGYD--SMPFEKPNISIGKQDPSIISVLGALVAKAPSEKELTYRVKNAFELSKVAG-----SKFTABEDAKI--LEALHFTVQQAARVSD--LIKSK--DSIENHAKQKCKLKVVEYSK--EFPKSGSLIPAA--  
34557932 *Wolinella succinogenes* DSM 1740 : : : ENAIGERYPLVIVQEG--GYIYQVATYKGELEKLVYTSKNDIAKLEIKNQDILSKENQYIKIFSNQTISELNSYNNMLVLRKEDIIVGLLEIVENCRYTKIKVDVFPKPYIETHYVYDFDWRPDEAMRY--LQENQK--TKSSK--DFVLIK--SLSNLYQDFK--  
118497352 *Francisella novicida* U112 : : : DGIYAENYPLHLKHELENVKRGY--WNSKEIE--IFKGGVILQJLNLVLYKLVKDFKIPISIDIQISTLE-----ELRNLITPNNIAT-----AEYIYML--KTKLHEIENYNTALGVKKYKEMEFRLSLAY--RSERVK--IKSID--DVKQLDKD-----SNFJIKLTFPK--

#positions selected for tree reconstruction (272)





```

303229466 Veillonella atypica ACS-134-V-Col7a : --RSTIGV-----KIHNLDFKII-NESITGLYSNEVTV-----
34762592 Fusobacterium nucleatum subsp. vincentii ATCC 49256 : EDTGRIRL-----GQSLGNKNEELLEESVTLGFVKIKL-----
374307738 Filifactor locis ATCC 35896 : -GSPVVK-----NTIGKSKILLV-NQSVTLGLYENRRRL-----
320528778 Solibacterium moorei F0204 : -AGVIVIP-----HFTKLSVFKVHQSTLGFPEKEMDLK-----
291520705 Coprococcus catus GD-7 : -AGILVMN-----NNITACKQISVINQSVPTGIYEKIDLKIL-----
42525843 Treponema denticola ATCC 35405 : -SGVAKIG-----NKISSLDNCILIQSITGFIFERIDLKLV-----
304438954 Peptoniphilus duerdenii ATCC BAA-1640 : -TGVVFP-----KKLNYKECKLI-NQSTLGLFENEVDLNL-----
224543312 Catenibacterium mitsukoi DSM 15897 : -----TKHNLNINIVFISQSPGTIYTKYKYL-----
24379809 Streptococcus kitaharae DSM 15159 : -----TSTTEILNATLHQSVTLGLYETRIDANLGGD-----
15675041 Streptococcus pyogenes SF70 : -----TSTKVELDATLHQSTLGLYETRIDLSQLGGD-----
16801805 Listeria innocua ClpI1263 : -----NMLKELNLSSTIYQSTLGLYETRIDLSQLGGD-----
116628213 Streptococcus thermophilus LMD-9 : -----TPSSLKDATLHQSVTLGLYETRIDLAKLGG-----
323463801 Staphylococcus pseudintermedius ED99 : -----TSISGLTKT--PKSLFKLAESRNL-----
352684361 Acidaminococcus intestini RYC-MR95 : -----SKKYSDRILVEQASGLFVSKSNLLEVL-----
302336020 Olsenella uli DSM 7084 : -----NPASFVLLDQSVTGMFERTRIGL-----
366983953 Oenococcus oeni DSM 17330 : -----TLADTDFPIQSVTGLFSTQKTVLAQLYQETK-----
310286728 Bifidobacterium bifidum S17 : -----FETVGLKRAKAKVNSKRNKRLPLSGASQP-----
259509199 Lactobacillus rhamnosus GG : -GLLQVGS-----GKLEKDTQIV-YQSPFGLFERPLADL-----
300361537 Lactobacillus gasseri JV-V03 : -LGFMQFS-----SGVLENSAKLIYQSTGLFERVKISDL-----
169823755 Finegoldia magna ATCC 29328 : -KP-----RITNLPDNTLYVYSITGIYEKIRIK-----
47458868 Mycoplasma mobile 163K : -----WKKV-NLTYMGEIFPK-----
284931710 Mycoplasma gallisepticum str. F : -FLMTLST-----ILNDYLLDAKDNDPLGLSKNRDEILNSKLGDKIVK-----
363542550 Mycoplasma ovipneumoniae SC01 : -VAPSTMP-----IPKEVPIHDB--LQNEYPVKIKHTDDKMLCTIK-----
394393286 Mycoplasma canis PG 14 : -LMPGLG-----KMTVGLQDIP--FKIK--KIFE-----
71894592 Mycoplasma synoviae 53 : -VSMK-----KTNPDDEYKILEHVPLGILNLAWTKLENNN-----
238924075 Eubacterium rectale ATCC 33656 : -----GLGKTKFIKY-RYDVLGNKYSCSEKFTSFC-----
116627542 Streptococcus thermophilus LMD-9 : -GQCKKG-----LGKSNISIVYK-RTDVLGNQHIKNEGDPKLDF-----
315149830 Enterococcus faecalis TX0012 : -NLNIAK-----YKGEKGLRKF-NTDLGKHKHLYEYKPKNIK-----
315659848 Staphylococcus lugdunensis M23590 : -----T-----IGKVNISEKL-TDVLGNVFTIYQTKPQLLFRKGN-----
160915782 Eubacterium dolichum DSM 3991 : -MRMPT-----ISKKIYPIKY-ATDVVGNLYVKRNTLKFEDF-----
336393381 Lactobacillus coryniformis subsp. torquens KCTC 3535 : -GLLGLFK-----GLGLLDFEKY-QVDVLGNVFKRQPLFVKRDE-----
310780384 Lycopobacter polytronus DSM 2926 : -MRI-----GKTKYKIKKY-QVDVLGNVFKRQPLFVKRDE-----
325677756 Ruminococcus albus 8 : -AVDLMG-----KVGQENNGKISGCEPLSLLEKKN-----
187736489 Akkermansia muciniphila ATCC BAA-835 : -NKTECNWREVDLISLLKQMKRYPYTYGTFP-----
117929158 Acidothermus cellulolyticus 11B : -KVLCHPLTVI-RRTALGQPRWRGRHLYSRRPWSADPWGGTP-----
189440764 Bifidobacterium longum DJ010A : -NTASKTAVRIV-RRNAPGEPRLSSAHHMPCSQWRHE-----
283456135 Bifidobacterium dentium Bd1 : -KGWVAV-----N-ILAKYHPVIRRNALGEPFRNTSNMGPVSRWDR-----
38232678 Corynebacterium hightheriae NCTC 13129 : -PWFJAV-----NRLSDGNVTVWRDLSLGRVIRNATVAFVFWVQ-----
187250660 Elusimicrobium minutum Bel191 : -QDSFTI-----NSMGQYNDREL-LSESQYIKVRSPLKNEKG-----
319957206 Nitratifactor salauginis DSM 16511 : -GIKAHL-----DLDGHVRSYEVFGLTPGSIWFKESSYGRVEDDPH-----
325972003 Sphaerochaeta globus str. Buddy : -DTSFTL-----TTIKNYDRKV-QLSAGLVRVSPLLVVKIEKDEVALCGE-----
261414553 Fibrobacter succinogenes subsp. succinogenes S85 : -DN-----KESIKDACVPV-ILDRLGNVIEFNGKRL-----
60683389 Bacteroides fragilis NCTC 9343 : -SSGLDTIVKV-RVNHIGQIVSVEY-----
256819408 Capnocytophaga ochracea DSM 7271 : -GLSLKDIVKY-RINHLGDIVSIGEY-----
90425961 Rhodopseudomonas palustris B1sB18 : -GLKTLASFKEP-TIDLRKRFIEFIEVRTWRGE--ACT-----
373501184 Prevotella micans F0438 : -PTAIRGKIKT-KPLMGKRRDFVRN-GNIEFKH-----
294674019 Prevotella ruminicola 23 : -RPLIVSYNPF-NALVQDLDFEINDLGEIRLLI-----
365959402 Flavobacterium columnare ATCC 49512 : --KINEN-----KPTRKMNNQF-TAFVGEIDFKVLPQKFKFI-----
312879015 Aminomonas paucivorans DSM 12260 : -TRKDLMSKY-QVDPLGEIRLVGSEKPPFVL-----
83591793 Rhodospirillum rubrum ATCC 11170 : -QSA-----EGIRKEKIRT-SC TALGRLLSKKAT-----
294086111 Candidatus Puncicepirillum marinum IMCC1322 : -SP-----GKLQASARKV-HISPTGLIREG-----
121608211 Verminephrobacter eiseniae EF01-2 : -DQLKRAKQV-TISPIRELDRPQFG-----
344171927 Ralstonia syyziji R24 : -KSP-----GALRDLGARRI-FVDLIGRVLDPGIKGD-----
159042956 Dinoroseobacter shibae DFL 12 : -GA-----RPAIASGIRRV-SVDEIGRLRDRGTRPI-----
288957741 Azospirillum sp- B510 : -DQLRARGARRV-RVDPLGRVIRVHAPGARVIGGDAGRTAMEPAEDI-----
92109262 Nitrobacter hamburgensis X14 : -LMASY-----NTLKLAAPV-RVDLGRVWRVMPN-----
148255343 Bradyrhizobium sp- BTA11 : -RWLFASF-----DKLEWNAELV-RIDTLGQPRWRKRGLETGSEDATRIGWTRPKWMP-----
34557790 Wolinella succinogenes DSM 1740 : -RKEFECQ-----GVKFLDKVYK-QIDPLGYEYVQKFKRLGTIPQMRSAKLWKK-----
219563121 Campylobacter jejuni subsp. jejuni NCTC 11168 : -GJMKLVFKY-----VSLALGVTKAEFRQREPK-----
291276265 Helicobacter mustelae 12198 : -MTRSC-----GIQGLVFKV-KLSVLGVELEHPRKQNIALKTTPKHV-----
229113166 Bacillus cereus Rock1-15 : -SLLARGI-----GKTNMLLEKY-QVDVLGRYKVGNEERQDKIQON-----
222109285 Acidovorax ebresus TFSY : -GVKTLSEKPY-NVDVLGRYILAPETRSGLA-----
189485225 uncultured Termite group 1 bacterium phylotype RaD17 : -GSRCLDFRKF-QVDVLGNVTEVHEKRMPIYTRKDKKH-----
182624245 Clostridium perfringens D str. JGS1721 : -LKVGVLEINKY-EVDVLGNVYKVKLGGN-----
220930482 Clostridium cellulolyticum H10 : -GVRTAISIEKY-NVDVLGNKSVKGEPRRGMKYNPSKSN-----
154250555 Parvibaculum lavamentivorans DS-1 : -NPIKDKAKV-SIDPIGRVRSND-----
257413184 Roseburia intestinalis L1-82 : -GIQSLDLEKC-QIDVIG-HVSVVRSKRRMGFS-----
218767588 Neisseria meningitidis Z2491 : -GVKTLSPQKY-QIDELGKEIRCPKRRKPPVR-----
15602992 Pasteurella multocida subsp. multocida str. Pm70 : -GVKTLSEKPY-QVDLGNKRCRQQRQPV-----
319941583 Sutterella wadsworthensis 3 1 45B : -LQQPR-----SEIFENVGNAKHIR-FWYIVVSNKMNESYNNVSKS-----
254447899 gamma proteobacterium HTCC5015 : -LIPPR-----SNLFLLETQKIT--FXYLANGANAIVKAYSLRRA-----
54296138 Legionella pneumophila str. Paris : -L-KPRD-----GKMKIVSTGKIVT--YFESDSTPQWITLYVTQLKQP-----
331001027 Parasutterella excrementihominis YIT 11859 : -LPKFREDNKH--GTFIEVLQPRVI--FNYIVGASLSKELFSEAKGERS-----
34557932 Wolinella succinogenes DSM 1740 : -KRMIFRAL--PEKEKGRKPKTT--ISFKESGPQDVLVFKIKVILQRLTDSGISN-----
118497352 Francisella novicida U112 : -MNHSLKRSY--PDKVLEILKQSTI--IEFESSGFNKTIKMLGKML--AGIYNETSNN-----

```

```

Motifs : _____G_____

```

```

#positions selected for tree reconstruction (272) : _____

```

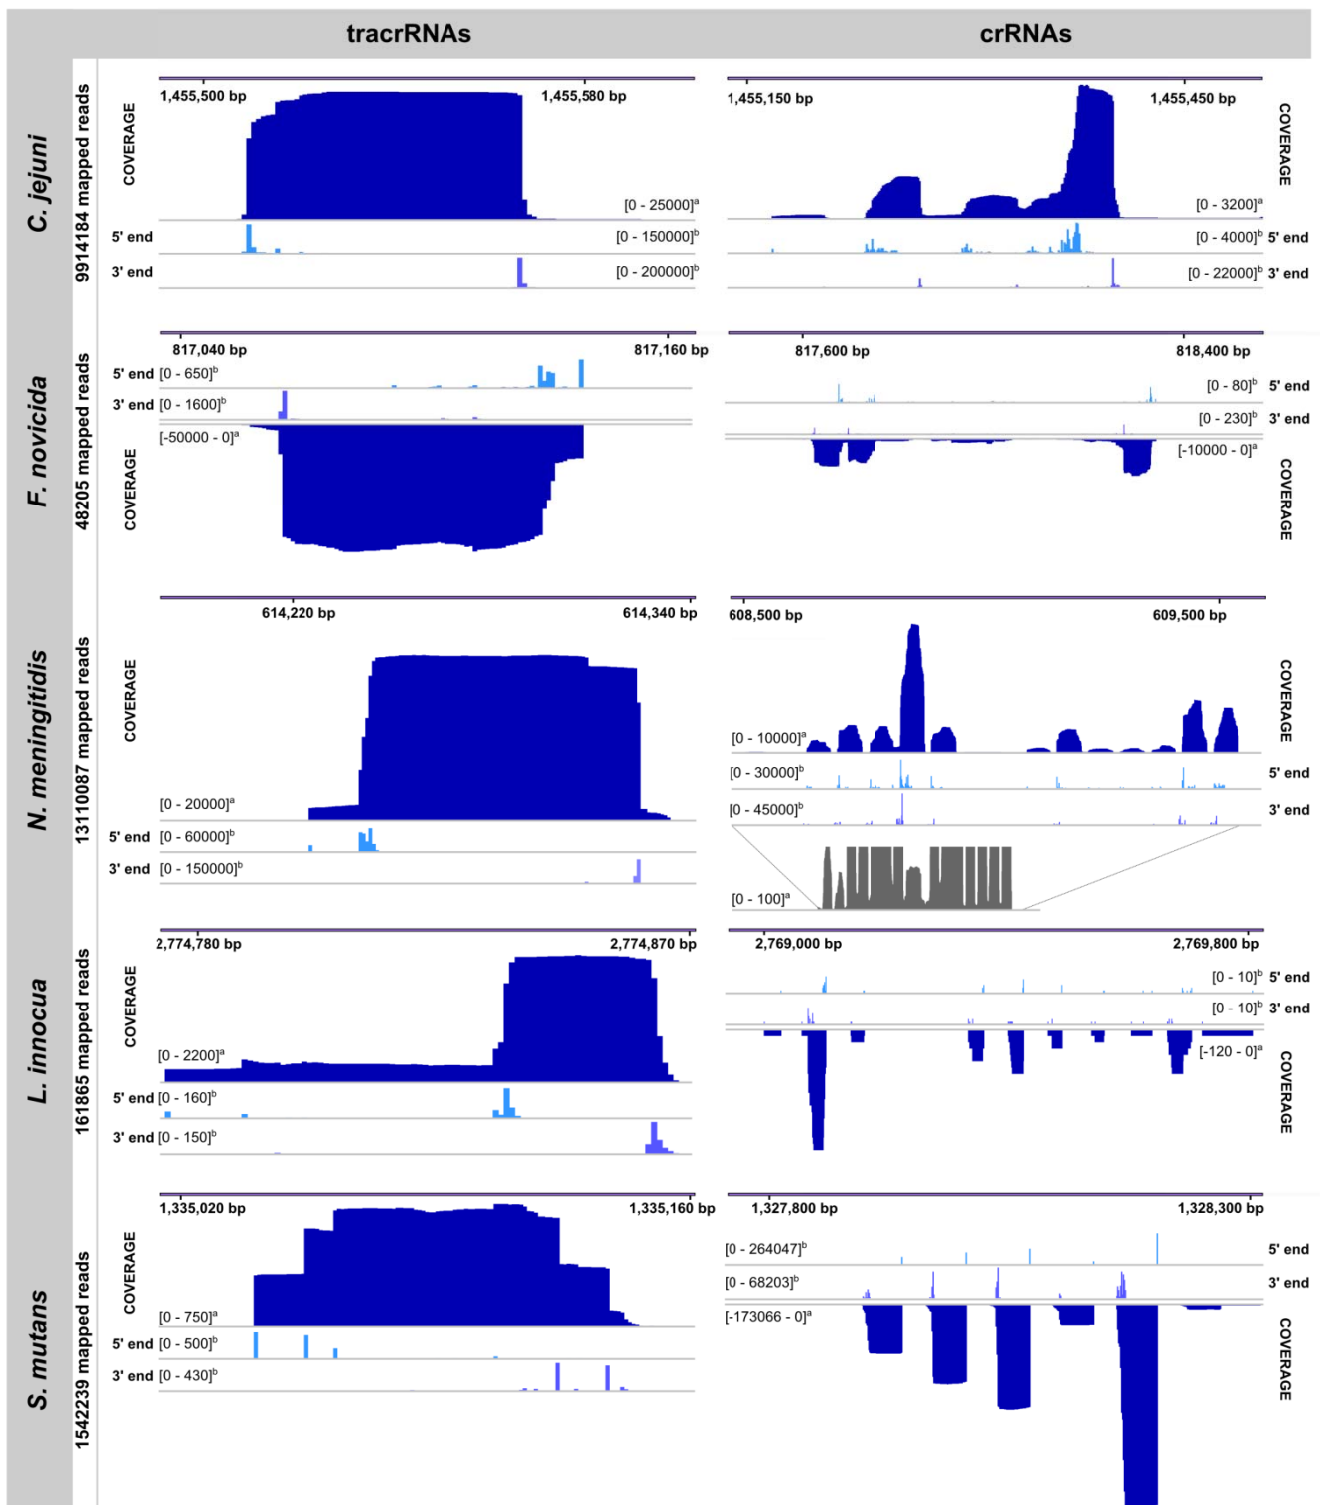

**Supplementary Figure 2. Expression of bacterial tracrRNA orthologues and crRNAs revealed by deep RNA sequencing.** Expression profiles of tracrRNA orthologues and crRNAs of selected bacterial strains are represented along the corresponding genomes by blue bar charts (Images captured from the Integrative Genomics Viewer (IGV) tool). *Campylobacter jejuni* (GenBank: NC\_002163), *Francisella novicida* (GenBank: NC\_008601), *Neisseria meningitidis* (GenBank: NC\_003116), *Listeria innocua* (GenBank: NC\_003212) and *Streptococcus mutans* (GenBank: NC\_004350). Genomic coordinates are given. <sup>a</sup>Sequence coverage calculated using BEDTools-Version-2.15.0 (Scale given in reads per million). <sup>b</sup>Distribution of reads starting (5') and ending (3') at each nucleotide position are indicated (Scale given in numbers of reads). Upper panels correspond to transcripts from the positive strand and lower panels correspond to transcripts from the negative strand. The negative coverage values and peaks presented below the axes indicate transcription from the negative strand of the genome. Predominant 5'- and 3'-ends of the reads are plotted for all RNAs. Note that given the low quality of *L. innocua* cDNA library, the reads are shortened for crRNAs, and an accumulation of the reads at the 3' end of tracrRNA is observed, presumably due to RNA degradation.



**Supplementary table 1. Bacterial species containing type II CRISPR-Cas loci characterized by the presence of the signature gene *cas9*.**

| Cluster <sup>a</sup>                           | Strains <sup>b</sup>                                                       | Cas9 GI          | Length (aa) |
|------------------------------------------------|----------------------------------------------------------------------------|------------------|-------------|
| 1                                              | <i>Enterococcus faecium</i> 1,231,408                                      | 257893735        | 1340        |
|                                                | <i>Enterococcus italicus</i> DSM 15952                                     | 315641599        | 1330        |
|                                                | <b><i>Listeria innocua</i> Clip11262</b>                                   | <b>16801805</b>  | <b>1334</b> |
|                                                | <i>Listeria monocytogenes</i> serotype 1-2a str. F6854                     | 47097148         | 1334        |
|                                                | <i>Streptococcus agalactiae</i> 2603V-R                                    | 22537057         | 1370        |
|                                                | <i>Streptococcus agalactiae</i> A909                                       | 76788458         | 1370        |
|                                                | <i>Streptococcus agalactiae</i> NEM316                                     | 25010965         | 1377        |
|                                                | <i>Streptococcus anginosus</i> F0211                                       | 315223162        | 1345        |
|                                                | <i>Streptococcus bovis</i> ATCC 700338                                     | 306833855        | 1373        |
|                                                | <i>Streptococcus dysgalactiae</i> subsp. <i>equisimilis</i> GGS 124        | 251782637        | 1371        |
|                                                | <i>Streptococcus equi</i> subsp. <i>zooepidemicus</i> MGCS10565            | 195978435        | 1348        |
|                                                | <i>Streptococcus equinus</i> ATCC 9812                                     | 320547102        | 1377        |
|                                                | <i>Streptococcus gallolyticus</i> subsp. <i>gallolyticus</i> ATCC BAA-2069 | 325978669        | 1370        |
|                                                | <i>Streptococcus gallolyticus</i> UCN34                                    | 288905639        | 1371        |
|                                                | <i>Streptococcus macacae</i> NCTC 11558                                    | 357636406        | 1338        |
|                                                | <i>Streptococcus mutans</i> NN2025                                         | 290580220        | 1345        |
|                                                | <b><i>Streptococcus mutans</i> UA159</b>                                   | <b>24379809</b>  | <b>1345</b> |
|                                                | <i>Streptococcus pseudoporcinus</i> SPIN 20026                             | 313890160        | 1326        |
|                                                | <b><i>Streptococcus pyogenes</i> SF370</b>                                 | <b>15675041</b>  | <b>1368</b> |
|                                                | <i>Streptococcus pyogenes</i> MGAS10270                                    | 94990395         | 1368        |
|                                                | <i>Streptococcus pyogenes</i> MGAS10750                                    | 94994317         | 1371        |
|                                                | <i>Streptococcus pyogenes</i> MGAS2096                                     | 94992340         | 1368        |
|                                                | <i>Streptococcus pyogenes</i> MGAS315                                      | 21910213         | 1368        |
| <i>Streptococcus pyogenes</i> MGAS5005         | 71910582                                                                   | 1368             |             |
| <i>Streptococcus pyogenes</i> MGAS6180         | 71903413                                                                   | 1368             |             |
| <i>Streptococcus pyogenes</i> MGAS9429         | 94988516                                                                   | 1368             |             |
| <i>Streptococcus pyogenes</i> NZ131            | 209559356                                                                  | 1368             |             |
| <i>Streptococcus pyogenes</i> SSI-1            | 28896088                                                                   | 1368             |             |
| <b><i>Streptococcus thermophilus</i> LMD-9</b> | <b>116628213</b>                                                           | <b>1388</b>      |             |
| 2                                              | <i>Bacteroides coprophilus</i> DSM 18228                                   | 224026357        | 1509        |
|                                                | <i>Bacteroides dorei</i> DSM 17855                                         | 212694363        | 1504        |
|                                                | <i>Bacteroides</i> sp. 20 3                                                | 301311869        | 1517        |
|                                                | <i>Capnocytophaga gingivalis</i> ATCC 33624                                | 228473057        | 1436        |
|                                                | <b><i>Fibrobacter succinogenes</i> subsp. <i>succinogenes</i> S85</b>      | <b>261414553</b> | <b>1512</b> |
|                                                | <i>Flavobacterium columnare</i> ATCC 49512                                 | 365960762        | 1459        |
|                                                | <i>Fluviicola taffensis</i> DSM 16823                                      | 327405121        | 1458        |
|                                                | <i>Mucilagibacter paludis</i> DSM 18603                                    | 373954054        | 1473        |
|                                                | <i>Prevotella bivia</i> JCVIHMP010                                         | 282858617        | 1485        |
|                                                | <i>Prevotella buccae</i> ATCC 33574                                        | 315607525        | 1457        |
|                                                | <i>Prevotella melaninogenica</i> D18                                       | 288802595        | 1354        |
|                                                | <i>Prevotella veroralis</i> F0319                                          | 260592128        | 1496        |
|                                                | <i>Psychroflexus torquis</i> ATCC 700755                                   | 408489713        | 1052        |
|                                                | <i>Sphingobacterium spiritivorum</i> ATCC 33861                            | 300771242        | 1426        |
|                                                | <i>Weeksella virosa</i> DSM 16922                                          | 325955459        | 1440        |
| 3                                              | <i>Actinobacillus minor</i> NM305                                          | 240949037        | 1056        |
|                                                | <i>Actinobacillus pleuropneumoniae</i> serovar 10 str. D13039              | 307256472        | 1054        |
|                                                | <i>Actinobacillus succinogenes</i> 130Z                                    | 152978060        | 1062        |
|                                                | <i>Haemophilus parainfluenzae</i> T3T1                                     | 345430422        | 1052        |
|                                                | <i>Kingella kingae</i> ATCC 23330                                          | 333374624        | 1000        |
|                                                | <i>Neisseria bacilliformis</i> ATCC BAA-1200                               | 329117879        | 1077        |
|                                                | <i>Neisseria cinerea</i> ATCC 14685                                        | 261378287        | 1082        |

| Cluster <sup>a</sup>                      | Strains <sup>b</sup>                                                    | Cas9 GI          | Length (aa) |
|-------------------------------------------|-------------------------------------------------------------------------|------------------|-------------|
| 3<br>(continued)                          | <i>Neisseria flavescens</i> SK114                                       | 241759613        | 1081        |
|                                           | <i>Neisseria lactamica</i> 020-06                                       | 313669044        | 1082        |
|                                           | <i>Neisseria meningitidis</i> 053442                                    | 161869390        | 1082        |
|                                           | <i>Neisseria meningitidis</i> alpha14                                   | 254804356        | 1082        |
|                                           | <b><i>Neisseria meningitidis</i> Z2491</b>                              | <b>218767588</b> | <b>1082</b> |
|                                           | <b><i>Pasteurella multocida</i> subsp. <i>multocida</i> str. Pm70</b>   | <b>15602992</b>  | <b>1056</b> |
|                                           | <i>Simonsiella muelleri</i> ATCC 29453                                  | 404379108        | 1065        |
| 4                                         | <i>Lactobacillus farciminis</i> KCTC 3681                               | 336394701        | 1126        |
|                                           | <i>Streptococcus gallolyticus</i> UCN34                                 | 288905632        | 1130        |
|                                           | <i>Streptococcus gordonii</i> str. Challis substr. CH1                  | 157150687        | 1136        |
|                                           | <i>Streptococcus infantarius</i> subsp. <i>infantarius</i> ATCC BAA-102 | 171779984        | 1129        |
|                                           | <i>Streptococcus macedonicus</i> ACA-DC 198                             | 374338350        | 1130        |
|                                           | <i>Streptococcus mitis</i> ATCC 6249                                    | 306829274        | 1134        |
|                                           | <i>Streptococcus pasteurianus</i> ATCC 43144                            | 336064611        | 1130        |
|                                           | <i>Streptococcus suis</i> 89-1591                                       | 223932525        | 1122        |
|                                           | <i>Streptococcus suis</i> ST3                                           | 330833104        | 1122        |
|                                           | <i>Streptococcus thermophilus</i> CNRZ1066                              | 55822627         | 1128        |
|                                           | <b><i>Streptococcus thermophilus</i> LMD-9</b>                          | <b>116627542</b> | <b>1121</b> |
|                                           | <i>Streptococcus thermophilus</i> LMG 18311                             | 55820735         | 1122        |
|                                           | <i>Streptococcus vestibularis</i> ATCC 49124                            | 322517104        | 1128        |
| 5                                         | <i>Bacteroides cellulosilyticus</i> DSM 14838                           | 224535832        | 1219        |
|                                           | <b><i>Bacteroides fragilis</i> NCTC 9343</b>                            | <b>60683389</b>  | <b>1436</b> |
|                                           | <i>Bacteroidetes</i> oral taxon 274 str. F0058                          | 298373376        | 1434        |
|                                           | <i>Capnocytophaga canimorsus</i> Cc5                                    | 340622236        | 1430        |
|                                           | <b><i>Capnocytophaga ochracea</i> DSM 7271</b>                          | <b>256819408</b> | <b>1426</b> |
|                                           | <i>Capnocytophaga sputigena</i> ATCC 33612                              | 213962376        | 1426        |
|                                           | <i>Flavobacterium psychrophilum</i> JIP02-86                            | 150025575        | 1354        |
|                                           | <i>Kordia algicida</i> OT-1                                             | 163754820        | 1391        |
|                                           | <i>Parabacteroides johnsonii</i> DSM 18315                              | 218258638        | 1443        |
|                                           | <i>Parabacteroides</i> sp. D13                                          | 256840409        | 1424        |
|                                           | <i>Prevotella oralis</i> ATCC 33269                                     | 323344874        | 1391        |
| <i>Zunongwangia profunda</i> SM-A87       | 295136244                                                               | 1388             |             |
| 6                                         | <i>Lactobacillus brevis</i> subsp. <i>gravesensis</i> ATCC 27305        | 227509761        | 1377        |
|                                           | <i>Lactobacillus buchneri</i> ATCC 11577                                | 227512703        | 1239        |
|                                           | <i>Lactobacillus buchneri</i> NRRL B-30929                              | 331702228        | 1371        |
|                                           | <i>Lactobacillus fermentum</i> ATCC 14931                               | 227514633        | 1381        |
|                                           | <b><i>Lactobacillus gasseri</i> JV-V03</b>                              | <b>300361537</b> | <b>1391</b> |
|                                           | <i>Lactobacillus jensenii</i> 269-3                                     | 238854567        | 1391        |
|                                           | <i>Lactobacillus johnsonii</i> DPC6026                                  | 385826041        | 1375        |
|                                           | <i>Lactobacillus ruminis</i> ATCC 25644                                 | 323340068        | 1375        |
|                                           | <i>Lactobacillus salivarius</i> UCC118                                  | 90961083         | 1149        |
|                                           | <i>Lactobacillus sanfranciscensis</i> TMW 1-1304                        | 347534532        | 1331        |
| <i>Pediococcus acidilactici</i> DSM 20284 | 304386254                                                               | 1364             |             |
| 7                                         | <i>Gemella haemolysans</i> ATCC 10379                                   | 241889924        | 1392        |
|                                           | <i>Gemella moribillum</i> M424                                          | 317495358        | 1385        |
|                                           | <i>Megasphaera</i> sp. UPII 135-E                                       | 342218215        | 1352        |
|                                           | <i>Peptoniphilus</i> sp. oral taxon 386 str. F0131                      | 299144352        | 1341        |
|                                           | <b><i>Veillonella atypica</i> ACS-134-V-Col7a</b>                       | <b>303229466</b> | <b>1398</b> |
|                                           | <i>Veillonella parvula</i> ATCC 17745                                   | 282849530        | 1398        |
| 8                                         | <i>Actinomyces coleocanis</i> DSM 15436                                 | 227494853        | 1105        |
|                                           | <i>Corynebacterium accolens</i> ATCC 49726                              | 306835141        | 1099        |
|                                           | <b><i>Corynebacterium diphtheriae</i> NCTC 13129</b>                    | <b>38232678</b>  | <b>1084</b> |
|                                           | <i>Corynebacterium matruchotii</i> ATCC 14266                           | 305681510        | 1089        |
|                                           | <i>Mobiluncus curtisii</i> subsp. <i>holmesii</i> ATCC 35242            | 315656340        | 1123        |

| Cluster <sup>a</sup>                            | Strains <sup>b</sup>                                               | Cas9 GI                                                  | Length (aa) |
|-------------------------------------------------|--------------------------------------------------------------------|----------------------------------------------------------|-------------|
|                                                 | <i>Mobiluncus mulieris</i> 28-1                                    | 269977848                                                | 1091        |
| 9                                               | <i>Gluconacetobacter diazotrophicus</i> PAI 5                      | 162147907                                                | 1050        |
|                                                 | <i>Gluconacetobacter diazotrophicus</i> PAI 5                      | 209542524                                                | 1003        |
|                                                 | <i>Methylocystis</i> sp. ATCC 49242                                | 323139312                                                | 1080        |
|                                                 | <i>Methylosinus trichosporium</i> OB3b                             | 296446027                                                | 1082        |
|                                                 | <b><i>Rhodopseudomonas palustris</i> BisB18</b>                    | <b>90425961</b>                                          | <b>1066</b> |
|                                                 | <i>Rhodopseudomonas palustris</i> BisB5                            | 91975509                                                 | 1064        |
|                                                 | 10                                                                 | <i>Acidovorax avenae</i> subsp. <i>avenae</i> ATCC 19860 | 326315085   |
| <i>Alicyclophilus denitrificans</i> BC          |                                                                    | 319760940                                                | 1029        |
| <i>Alicyclophilus denitrificans</i> K601        |                                                                    | 330822845                                                | 1029        |
| <i>gamma proteobacterium</i> HdN1               |                                                                    | 304313029                                                | 1025        |
| <i>Nitrosomonas</i> sp. AL212                   |                                                                    | 325983496                                                | 1044        |
| <b><i>Verminephrobacter eiseniae</i> EF01-2</b> |                                                                    | <b>121608211</b>                                         | <b>1068</b> |
| 11                                              |                                                                    | <i>Campylobacter jejuni</i> subsp. <i>doylei</i> 269-97  | 153952471   |
|                                                 | <i>Campylobacter jejuni</i> subsp. <i>jejuni</i> 81116             | 157415744                                                | 984         |
|                                                 | <b><i>Campylobacter jejuni</i> subsp. <i>jejuni</i> NCTC 11168</b> | <b>218563121</b>                                         | <b>984</b>  |
|                                                 | <i>Helicobacter canadensis</i> MIT 98-5491                         | 253828136                                                | 1007        |
|                                                 | <i>Helicobacter cinaedi</i> CCUG 18818                             | 313144862                                                | 1023        |
| 12                                              | <i>Coriobacterium glomerans</i> PW2                                | 328956315                                                | 1384        |
|                                                 | <i>Eggerthella</i> sp. YY7918                                      | 339445983                                                | 1380        |
|                                                 | <i>Gordonibacter pamelaeeae</i> 7-10-1-b                           | 295106015                                                | 1371        |
|                                                 | <b><i>Olsenella uli</i> DSM 7084</b>                               | <b>302336020</b>                                         | <b>1399</b> |
| 13                                              | <i>Lactobacillus casei</i> BL23                                    | 191639137                                                | 1361        |
|                                                 | <i>Lactobacillus casei</i> str. Zhang                              | 301067199                                                | 1361        |
|                                                 | <i>Lactobacillus paracasei</i> subsp. <i>paracasei</i> 8700-2      | 239630053                                                | 1362        |
|                                                 | <b><i>Lactobacillus rhamnosus</i> GG</b>                           | <b>258509199</b>                                         | <b>1363</b> |
| 14                                              | <i>Prevotella buccalis</i> ATCC 35310                              | 282878504                                                | 1218        |
|                                                 | <b><i>Prevotella ruminicola</i> 23</b>                             | <b>294674019</b>                                         | <b>1204</b> |
|                                                 | <i>Prevotella tanneriae</i> ATCC 51259                             | 258648111                                                | 1234        |
|                                                 | <i>Prevotella timonensis</i> CRIS 5C-B1                            | 282880052                                                | 1218        |
| 15                                              | <b><i>Bifidobacterium dentium</i> Bd1</b>                          | <b>283456135</b>                                         | <b>1138</b> |
|                                                 | <b><i>Bifidobacterium longum</i> DJO10A</b>                        | <b>189440764</b>                                         | <b>1187</b> |
|                                                 | <i>Gardnerella vaginalis</i> 5-1                                   | 298252606                                                | 1186        |
|                                                 | <i>Scardovia inopinata</i> F0304                                   | 294790575                                                | 1178        |
| 16                                              | <i>Anaerococcus tetradius</i> ATCC 35098                           | 227501312                                                | 1361        |
|                                                 | <i>Lactobacillus iners</i> LactinV 11V1-d                          | 309803917                                                | 1369        |
|                                                 | <b><i>Peptoniphilus duerdenii</i> ATCC BAA-1640</b>                | <b>304438954</b>                                         | <b>1364</b> |
| 17                                              | <b><i>Coprococcus catus</i> GD-7</b>                               | <b>291520705</b>                                         | <b>1338</b> |
|                                                 | <i>Dorea longicatena</i> DSM 13814                                 | 153855454                                                | 1340        |
|                                                 | <i>Ruminococcus lactaris</i> ATCC 29176                            | 197301447                                                | 1341        |
| 18                                              | <i>Phascolarctobacterium succinatutens</i> YIT 12067               | 323142435                                                | 1087        |
|                                                 | <b><i>Roseburia intestinalis</i> L1-82</b>                         | <b>257413184</b>                                         | <b>1140</b> |
|                                                 | <i>Roseburia inulinivorans</i> DSM 16841                           | 225377804                                                | 1152        |
| 19                                              | <b><i>Dinoroseobacter shibae</i> DFL 12</b>                        | <b>159042956</b>                                         | <b>1079</b> |
|                                                 | <i>Maritimibacter alkaliphilus</i> HTCC2654                        | 84685065                                                 | 997         |
|                                                 | <i>Sphingomonas</i> sp. S17                                        | 332188827                                                | 1090        |
| 20                                              | <i>Flavobacterium branchiophilum</i> FL-15                         | 347536497                                                | 1473        |
|                                                 | <b><i>Flavobacterium columnare</i> ATCC 49512</b>                  | <b>365959402</b>                                         | <b>1535</b> |
| 21                                              | <i>Burkholderiales bacterium</i> 1 1 47                            | 303257695                                                | 1428        |
|                                                 | <b><i>Parasutterella excrementihominis</i> YIT 11859</b>           | <b>331001027</b>                                         | <b>1428</b> |
| 22                                              | <i>Prevotella denticola</i> F0289                                  | 327314511                                                | 1218        |
|                                                 | <b><i>Prevotella micans</i> F0438</b>                              | <b>373501184</b>                                         | <b>1425</b> |
| 23                                              | <b><i>Acidaminococcus intestini</i> RyC-MR95</b>                   | <b>352684361</b>                                         | <b>1358</b> |
|                                                 | <i>Acidaminococcus</i> sp. D21                                     | 227824983                                                | 1358        |

| Cluster <sup>a</sup> | Strains <sup>b</sup>                                                      | Cas9 GI          | Length (aa) |
|----------------------|---------------------------------------------------------------------------|------------------|-------------|
| 24                   | <b><i>Staphylococcus pseudintermedius</i> ED99</b>                        | <b>323463801</b> | <b>1334</b> |
|                      | <i>Staphylococcus simulans</i> ACS-120-V-Sch1                             | 410878248        | 1112        |
| 25                   | <b><i>Mycoplasma gallisepticum</i> str. F</b>                             | <b>284931710</b> | <b>1269</b> |
|                      | <i>Mycoplasma gallisepticum</i> str. R-low                                | 294660600        | 1270        |
| 26                   | <b><i>Elusimicrobium minutum</i> Pei191</b>                               | <b>187250660</b> | <b>1195</b> |
|                      | uncultured Termite group 1 bacterium phylotype Rs-D17                     | 189485059        | 1032        |
| 27                   | <i>Francisella tularensis</i> subsp. <i>tularensis</i> SCHU S4            | 56707712         | 1123        |
|                      | <i>Francisella tularensis</i> subsp. <i>tularensis</i> WY96-3418          | 134302318        | 1125        |
| 28                   | <i>Clostridium spiroforme</i> DSM 1552                                    | 169349750        | 1116        |
|                      | <b><i>Eubacterium dolichum</i> DSM 3991</b>                               | <b>160915782</b> | <b>1096</b> |
| 29                   | <b><i>Eubacterium rectale</i> ATCC 33656</b>                              | <b>238924075</b> | <b>1114</b> |
|                      | <i>Eubacterium ventriosum</i> ATCC 27560                                  | 154482474        | 1107        |
| 30                   | <i>Staphylococcus aureus</i> M06/0171                                     | 403411236        | 1053        |
|                      | <b><i>Staphylococcus lugdunensis</i> M23590</b>                           | <b>315659848</b> | <b>1054</b> |
| 31                   | <b><i>Francisella novicida</i> U112</b>                                   | <b>118497352</b> | <b>1629</b> |
| 32                   | <b><i>Sutterella wadsworthensis</i> 3 1 45B</b>                           | <b>319941583</b> | <b>1422</b> |
| 33                   | <b><i>Bifidobacterium bifidum</i> S17</b>                                 | <b>310286728</b> | <b>1420</b> |
| 34                   | <b><i>Wolinella succinogenes</i> DSM 1740</b>                             | <b>34557932</b>  | <b>1409</b> |
| 35                   | <b><i>gamma proteobacterium</i> HTCC5015</b>                              | <b>254447899</b> | <b>1397</b> |
| 36                   | <b><i>Treponema denticola</i> ATCC 35405</b>                              | <b>42525843</b>  | <b>1395</b> |
| 37                   | <b><i>Oenococcus kitaharae</i> DSM 17330</b>                              | <b>366983953</b> | <b>1389</b> |
| 38                   | <b><i>Fusobacterium nucleatum</i> subsp. <i>vincentii</i> ATCC 49256</b>  | <b>34762592</b>  | <b>1374</b> |
| 39                   | <b><i>Legionella pneumophila</i> str. Paris</b>                           | <b>54296138</b>  | <b>1372</b> |
| 40                   | <b><i>Filifactor alocis</i> ATCC 35896</b>                                | <b>374307738</b> | <b>1365</b> |
| 41                   | <b><i>Finegoldia magna</i> ATCC 29328</b>                                 | <b>169823755</b> | <b>1348</b> |
| 42                   | <b><i>Catenibacterium mitsuokai</i> DSM 15897</b>                         | <b>224543312</b> | <b>1329</b> |
| 43                   | <b><i>Solobacterium moorei</i> F0204</b>                                  | <b>320528778</b> | <b>1327</b> |
| 44                   | <b><i>Mycoplasma synoviae</i> 53</b>                                      | <b>71894592</b>  | <b>1314</b> |
| 45                   | <b><i>Mycoplasma ovipneumoniae</i> SC01</b>                               | <b>363542550</b> | <b>1265</b> |
| 46                   | <i>Streptobacillus moniliformis</i> DSM 12112                             | 269123826        | 1259        |
| 47                   | <b><i>Mycoplasma mobile</i> 163K</b>                                      | <b>47458868</b>  | <b>1236</b> |
| 48                   | <b><i>Mycoplasma canis</i> PG14</b>                                       | <b>384393286</b> | <b>1233</b> |
| 49                   | <b><i>Sphaerochaeta globus</i> str. Buddy</b>                             | <b>325972003</b> | <b>1179</b> |
| 50                   | <b><i>Rhodospirillum rubrum</i> ATCC 11170</b>                            | <b>83591793</b>  | <b>1173</b> |
| 51                   | <b><i>Azospirillum</i> sp. B510</b>                                       | <b>288957741</b> | <b>1168</b> |
| 52                   | <i>Streptococcus sanguinis</i> VMC66                                      | 323351495        | 1167        |
| 53                   | <b><i>Nitrobacter hamburgensis</i> X14</b>                                | <b>92109262</b>  | <b>1166</b> |
| 54                   | <b><i>Ruminococcus albus</i> 8</b>                                        | <b>325677756</b> | <b>1156</b> |
| 55                   | <b><i>Enterococcus faecalis</i> TX0012</b>                                | <b>315149830</b> | <b>1150</b> |
| 56                   | <b><i>Acidothermus cellulolyticus</i> 11B</b>                             | <b>117929158</b> | <b>1138</b> |
| 57                   | <b><i>Nitratifractor salsuginis</i> DSM 16511</b>                         | <b>319957206</b> | <b>1132</b> |
| 58                   | <b><i>Acidovorax ebreus</i> TPSY</b>                                      | <b>222109285</b> | <b>1131</b> |
| 59                   | <b><i>Lactobacillus coryniformis</i> subsp. <i>torquens</i> KCTC 3535</b> | <b>336393381</b> | <b>1119</b> |
| 60                   | <b><i>Akkermansia muciniphila</i> ATCC BAA-835</b>                        | <b>187736489</b> | <b>1101</b> |
| 61                   | <b><i>Ilyobacter polytropus</i> DSM 2926</b>                              | <b>310780384</b> | <b>1092</b> |
| 62                   | <b><i>Bacillus cereus</i> Rock1-15</b>                                    | <b>229113166</b> | <b>1069</b> |
| 63                   | <b><i>Clostridium perfringens</i> D str. JGS1721</b>                      | <b>182624245</b> | <b>1065</b> |
| 64                   | <b><i>Bradyrhizobium</i> sp. BTAi1</b>                                    | <b>148255343</b> | <b>1064</b> |
| 65                   | <b><i>Ralstonia syzygii</i> R24</b>                                       | <b>344171927</b> | <b>1062</b> |
| 66                   | <b><i>Wolinella succinogenes</i> DSM 1740</b>                             | <b>34557790</b>  | <b>1059</b> |
| 67                   | <b><i>Aminomonas paucivorans</i> DSM 12260</b>                            | <b>312879015</b> | <b>1052</b> |

| Cluster <sup>a</sup> | Strains <sup>b</sup>                                         | Cas9 GI          | Length (aa) |
|----------------------|--------------------------------------------------------------|------------------|-------------|
| 68                   | <b><i>Parvibaculum lavamentivorans</i> DS-1</b>              | <b>154250555</b> | <b>1037</b> |
| 69                   | <b><i>Candidatus Puniceispirillum marinum</i> IMCC1322</b>   | <b>294086111</b> | <b>1035</b> |
| 70                   | <b>uncultured Termite group 1 bacterium phylotype Rs-D17</b> | <b>189485225</b> | <b>1032</b> |
| 71                   | <i>Blastopirellula marina</i> DSM 3645                       | 87307579         | 1027        |
| 72                   | <b><i>Helicobacter mustelae</i> 12198</b>                    | <b>291276265</b> | <b>1024</b> |
| 73                   | <b><i>Clostridium cellulolyticum</i> H10</b>                 | <b>220930482</b> | <b>1021</b> |
| 74                   | <i>Streptococcus downei</i> F0415                            | 312866154        | 994         |
| 75                   | <i>Treponema vincentii</i> ATCC 35580                        | 257456748        | 992         |
| 76                   | <i>Mycoplasma iowae</i> 695                                  | 350546886        | 933         |
| 77                   | <i>Listeria seeligeri</i> FSL N1-067                         | 313631816        | 874         |
| 78                   | <i>Listeria ivanovii</i> FSL F6-596                          | 315301624        | 849         |
|                      | <i>Butyrivibrio fibrisolvens</i> 16-4                        | 291518097        | 765         |
|                      | <i>Coprococcus comes</i> ATCC 27758                          | 226325213        | 686         |
|                      | <i>Francisella tularensis</i> subsp. <i>holarctica</i> LVS   | 89256630         | 158         |
|                      | <i>Francisella tularensis</i> subsp. <i>holarctica</i> LVS   | 89256631         | 393         |
|                      | <i>Haemophilus pittmaniae</i> HK 85                          | 343519679        | 650         |
|                      | <i>Helicobacter hepaticus</i> ATCC 51449                     | 32266975         | 131         |
|                      | <i>Helicobacter pullorum</i> MIT 98-5489                     | 242309214        | 702         |
|                      | <i>Neisseria subflava</i> NJ9703                             | 284799897        | 587         |
|                      | <i>Nitrobacter hamburgensis</i> X14                          | 92118334         | 641         |
|                      | <i>Oribacterium sinus</i> F0268                              | 227873236        | 653         |
|                      | <i>Prevotella disiens</i> FB035-09AN                         | 303237415        | 795         |
|                      | <i>Pseudoramibacter alactolyticus</i> ATCC 23263             | 315926102        | 586         |
|                      | <i>Treponema phagedenis</i> F0421                            | 320536384        | 738         |
|                      | uncultured Termite group 1 bacterium phylotype Rs-D17        | 189485058        | 166         |

<sup>a</sup>Sequences are grouped according to the BLASTclust clustering program. Only sequences longer than 800 amino acids were selected for the BLASTclust analysis (see Materials and Methods). <sup>b</sup>Representative strains harboring cas9 orthologue genes are listed; GI, GenInfo Identifier. Bold, representative sequences of each group chosen for the alignment and tree formation. Grey, discarded, incomplete Cas9 sequences (see Materials and Methods). Sequences that were not clustered are listed at the bottom of the table. They were considered as possible Cas9 sequences based on the presence of conserved motifs and/or other cas genes in their immediate vicinity. As incomplete, they were not selected for further analysis.

**Supplementary Table 2. Predicted pre-crRNA repeat:tracrRNA anti-repeat base-pairing in selected bacterial species.**

| Strain <sup>a</sup>                                                  | CRISPR type II identifier <sup>b</sup> | pre-crRNA repeat:tracrRNA base-pairing <sup>c</sup>                                                                                                                                                                                         |
|----------------------------------------------------------------------|----------------------------------------|---------------------------------------------------------------------------------------------------------------------------------------------------------------------------------------------------------------------------------------------|
| <i>Francisella tularensis</i> subsp. <i>novicida</i><br>U112         | NC_008601_1 <sup>d</sup>               | GUUUCAGUUGCUGAAUUAUUUGGUAACUACU-GUUAG<br>     <br>CAAAGUCAACAAUCUAAUAAACCAUAC-AUGAACACAA<br><br>GUUUCAGUUGC-UGAAUUAUUUGGUAACUACUGUUAG<br>•                        <br>UAAUGUCU-CGUAAUUAAUAAACCAUGUAAAUUUAAA                                 |
| <i>Wolinella succinogenes</i><br>DSM 1740                            | NC_005090_2 <sup>d</sup>               | GCAACACUUUAUAGCAAUCCGCUUAGCCUG-UGAAAC<br>     <br>CGUUGUGAAAUAUCGUUUAGGCAAGCUACGGAACUUU<br><br>GCAACACUUUAUAGCAAUCCGCUUAGCCUGUGAAAC<br>     •   •     • •         •   <br>CGUUGUGAGAUAUUUUAGGGUAGGUCGAAAUUGUUU                              |
| gamma proteobacterium<br>HTCC5015                                    | ND <sup>c</sup>                        | GUUUCAGAGCUUAUCCCAACAAACCA-ACAGCUGAAAC<br>     •                     <br>AUAAGUCUUACGUAGGGUUGUAAGAUUAGU-GACUUUA<br><br>GUUUCAGAGCUUAUCCCAACAAACCAACAGCUGAAAC<br>                     <br>CAAAGUCUCGAAUAGGUCGUUUUUGAGGGAAACAAUA              |
| <i>Sutterella wadsworthensis</i><br>3 1 45B                          | ND <sup>e</sup>                        | GCGAAGAUCAUACGCUACGAGCUAUAGCAGCUGAAAC<br>•  •  •           •                 <br>UGUCUUUAGUAUUUGCGGUCGUAUACGAACCUUUG<br><br>GCGAAGAUCAUACGCUACGAGCUAUAGCAGCUGAAAC<br>•                           <br>AAUCUCUAGUAUUUGCGAUACUCGAUAUCCUUUAGUGG |
| <i>Parasutterella excrementihominis</i><br>YIT 11859                 | ND                                     | Not possible to analyze – too short contig                                                                                                                                                                                                  |
| <i>Legionella pneumophila</i><br>str. Paris                          | NC_006368_1                            | CCAAUAAUCCCUCAUCUAAAAUCCA-ACCACUGAAAC<br>                             <br>AUUUAAUCUUUAGUAGAUUUUAAAGCUAUGG-GACUUUA                                                                                                                           |
| <i>Listeria innocua</i><br>Clip11262                                 | NC_003212_2                            | GUUUUAG--AGCUAUGUUAUUUUGAAUGCUAACAAAAC<br>    •                          <br>AAAUUGAACGAUACAAUAAAACUUAUGAUUGUUAUA                                                                                                                           |
| <i>Streptococcus thermophilus</i><br>LMD-9                           | NC_008532_5                            | GUUUUAG--AGCUGUGUUGUUUCGAAUGGUUCCAAAAC<br>    •                          <br>AAAUUGAGCGACACAACAAAGCUUACCAAAGUUUGG                                                                                                                           |
| <i>Streptococcus mutans</i><br>UA159                                 | NC_004350_1                            | GUUUUAG--AGCUGUGUUGUUUCGAAUGGUUCCAAAAC<br>    •                          <br>AAAUUGAACGACACAACAAAGCUUACUAGGUUGUG                                                                                                                            |
| <i>Streptococcus pyogenes</i><br>SF370                               | NC_002737_1                            | GUUUUAG--AGCUAUGCUGUUUUGAAUGGUCCAAAAC<br>    •                          <br>AAAUUGAACGAUACGACAAAACUUAACAAAGUUUGU                                                                                                                            |
| <i>Fusobacterium nucleatum</i> subsp.<br><i>vincentii</i> ATCC 49256 | ND                                     | GUUUGAGAGUAAUGUUAUUUAAAAUAGAUAUCAAAC<br>   •   •                •               <br>CAUAUACGAGGUAAAAUUAUGAAUUUAAUUUUUA                                                                                                                      |
| <i>Filifactor alocis</i><br>ATCC 35896                               | NC_016630_2                            | GUUUGAGAGUAGUGUAAUUUCAUAGUGAGUCAAC<br>  •               •              <br>ACUUGG-CACAUACAUUAGAGUAUACCAUCAGUU-GA                                                                                                                            |
| <i>Peptoniphilus duerdenii</i><br>ATCC BAA-1640                      | ND                                     | No significant anti-repeat found                                                                                                                                                                                                            |
| <i>Treponema denticola</i><br>ATCC35405                              | NC_002967_1                            | GUUUGAG--AGUUGUGUAAUUUAGAUGGAUCUCAAAC<br>    •                          <br>AACUUGAGCAACACAUUUAAUUUCAACCUAGAAUUUA                                                                                                                           |











Supplementary table 3. tracrRNA orthologue and crRNA sequencing data.

| sRNA                                                                   | Strand | Size mature form | Region of interest |         | Reads   | Coverage (%) | Sequence | 5' end read number                            |         | 3' end read number |      |         |   |      |
|------------------------------------------------------------------------|--------|------------------|--------------------|---------|---------|--------------|----------|-----------------------------------------------|---------|--------------------|------|---------|---|------|
| <i>C. jejuni</i> NCTC 11168 (NC_002163.1), total mapped reads: 9914184 |        |                  |                    |         |         |              |          |                                               |         |                    |      |         |   |      |
| crRNA<br>4 spacers                                                     | →      | crRNA1           | 36                 | 1455167 | 1455202 | 781          | 0.0079   | AGTTTTTAAAAAGAGCTTGGCGGTTGTTTTAGT<br>CCCTTTT  | 1455162 | A                  | 1    | 1455198 | T | 5    |
|                                                                        |        |                  |                    |         |         |              |          |                                               | 1455165 | G                  | 2    | 1455199 | C | 5    |
|                                                                        |        |                  |                    |         |         |              |          |                                               | 1455166 | C                  | 3    | 1455200 | C | 16   |
|                                                                        |        |                  |                    |         |         |              |          |                                               | 1455167 | A                  | 419  | 1455201 | C | 72   |
|                                                                        |        |                  |                    |         |         |              | 1455168  | G                                             | 19      | 1455202            | T    | 385     |   |      |
|                                                                        |        |                  |                    |         |         |              | 1455169  | T                                             | 7       | 1455203            | T    | 82      |   |      |
|                                                                        |        |                  |                    |         |         |              | 1455170  | T                                             | 75      | 1455204            | T    | 30      |   |      |
|                                                                        |        |                  |                    |         |         |              | 1455171  | T                                             | 24      | 1455205            | T    | 112     |   |      |
|                                                                        |        |                  |                    |         |         |              | 1455172  | T                                             | 9       | 1455206            | T    | 5       |   |      |
|                                                                        |        |                  |                    |         |         |              | 1455173  | T                                             | 11      |                    |      |         |   |      |
|                                                                        |        |                  |                    |         |         |              | 1455174  | A                                             | 4       |                    |      |         |   |      |
|                                                                        |        | crRNA2           | 38                 | 1455231 | 1455268 | 2658         | 0.0268   | CAAAGTTTCATTAGTTGAATTTAACTGTTTTA<br>GTCCCTTTT | 1455227 | T                  | 4    | 1455264 | T | 3    |
|                                                                        |        |                  | 29                 | 1455240 | 1455268 |              |          |                                               | 1455228 | T                  | 1    | 1455265 | C | 14   |
|                                                                        |        |                  |                    |         |         |              |          |                                               | 1455230 | C                  | 37   | 1455266 | C | 60   |
|                                                                        |        |                  |                    |         |         |              |          |                                               | 1455231 | C                  | 206  | 1455267 | C | 240  |
|                                                                        |        |                  |                    |         |         |              |          |                                               | 1455232 | A                  | 72   | 1455268 | T | 1364 |
|                                                                        |        |                  |                    |         |         |              |          |                                               | 1455233 | A                  | 34   | 1455269 | T | 348  |
|                                                                        |        |                  |                    |         |         |              |          |                                               | 1455234 | A                  | 59   | 1455270 | T | 29   |
|                                                                        |        |                  |                    |         |         |              |          |                                               | 1455235 | G                  | 280  | 1455271 | T | 44   |
|                                                                        |        |                  |                    |         |         |              |          |                                               | 1455236 | T                  | 168  | 1455272 | T | 15   |
|                                                                        |        |                  |                    |         |         |              |          |                                               | 1455237 | T                  | 130  | 1455273 | A | 2    |
|                                                                        |        |                  |                    |         |         |              |          |                                               | 1455238 | T                  | 36   |         |   |      |
|                                                                        |        |                  |                    |         |         |              |          |                                               | 1455239 | C                  | 259  |         |   |      |
|                                                                        |        |                  |                    |         |         |              |          |                                               | 1455240 | A                  | 317  |         |   |      |
|                                                                        |        |                  |                    |         |         |              |          |                                               | 1455241 | T                  | 148  |         |   |      |
|                                                                        |        |                  |                    |         |         |              |          |                                               | 1455242 | T                  | 298  |         |   |      |
|                                                                        |        |                  |                    |         |         |              |          |                                               | 1455243 | A                  | 157  |         |   |      |
|                                                                        |        |                  |                    |         |         |              |          |                                               | 1455244 | G                  | 40   |         |   |      |
|                                                                        |        | crRNA3           | 35                 | 1455300 | 1455334 | 4729         | 0.0477   | AAGAATGAGGATGATGATATTTTACAGTTTTA<br>GTCCCTTTT | 1455292 | T                  | 16   | 1455329 | G | 21   |
|                                                                        |        |                  |                    |         |         |              |          |                                               | 1455293 | C                  | 62   | 1455330 | T | 479  |
|                                                                        |        |                  |                    |         |         |              |          |                                               | 1455294 | T                  | 5    | 1455331 | C | 23   |
|                                                                        |        |                  |                    |         |         |              |          |                                               | 1455295 | A                  | 12   | 1455332 | C | 48   |
|                                                                        |        |                  |                    |         |         |              |          |                                               | 1455296 | C                  | 23   | 1455333 | C | 179  |
|                                                                        |        |                  |                    |         |         |              |          |                                               | 1455297 | A                  | 367  | 1455334 | T | 1226 |
|                                                                        |        |                  |                    |         |         |              |          |                                               | 1455298 | A                  | 143  | 1455335 | T | 220  |
|                                                                        |        |                  |                    |         |         |              |          |                                               | 1455299 | G                  | 563  | 1455336 | T | 54   |
|                                                                        |        |                  |                    |         |         |              |          |                                               | 1455300 | A                  | 1014 | 1455337 | T | 49   |
|                                                                        |        |                  |                    |         |         |              |          |                                               | 1455301 | A                  | 415  | 1455338 | T | 55   |
|                                                                        |        |                  |                    |         |         |              |          |                                               | 1455302 | T                  | 242  | 1455339 | A | 1    |
|                                                                        |        |                  |                    |         |         |              |          |                                               | 1455303 | G                  | 589  |         |   |      |
|                                                                        |        |                  |                    |         |         |              |          |                                               | 1455304 | A                  | 55   |         |   |      |
|                                                                        |        |                  |                    |         |         |              |          |                                               | 1455305 | G                  | 2    |         |   |      |
|                                                                        |        | crRNA4           | 26                 | 1455376 | 1455401 | 17404        | 0.1755   | GTGTGCTAAAAAATGGACTTAAATGTTTTA<br>GTCCCTTTT   | 1455360 | T                  | 6    | 1455398 | C | 63   |
|                                                                        |        |                  |                    |         |         |              |          |                                               | 1455361 | G                  | 2    | 1455399 | C | 645  |
|                                                                        |        |                  |                    |         |         |              |          |                                               | 1455362 | A                  | 9    | 1455400 | T | 9844 |
|                                                                        |        |                  |                    |         |         |              |          |                                               | 1455363 | G                  | 261  | 1455401 | T | 1518 |
|                                                                        |        |                  |                    |         |         |              |          |                                               | 1455364 | T                  | 51   | 1455402 | T | 481  |
|                                                                        |        |                  |                    |         |         |              |          |                                               | 1455365 | G                  | 598  | 1455403 | T | 763  |
|                                                                        |        |                  |                    |         |         |              |          |                                               | 1455366 | T                  | 77   | 1455404 | T | 578  |
|                                                                        |        |                  |                    |         |         |              |          |                                               | 1455367 | G                  | 552  | 1455405 | A | 4    |
|                                                                        |        |                  |                    |         |         |              |          |                                               | 1455368 | C                  | 579  |         |   |      |
|                                                                        |        |                  |                    |         |         |              |          |                                               | 1455369 | T                  | 901  |         |   |      |
|                                                                        |        |                  |                    |         |         |              |          |                                               | 1455370 | A                  | 816  |         |   |      |
|                                                                        |        |                  |                    |         |         |              |          |                                               | 1455371 | A                  | 227  |         |   |      |
|                                                                        |        |                  |                    |         |         |              |          |                                               | 1455372 | A                  | 262  |         |   |      |
|                                                                        |        |                  |                    |         |         |              |          |                                               | 1455373 | A                  | 1072 |         |   |      |
|                                                                        |        |                  |                    |         |         |              |          |                                               | 1455374 | A                  | 1269 |         |   |      |
|                                                                        |        |                  |                    |         |         |              |          |                                               | 1455375 | A                  | 1991 |         |   |      |
|                                                                        |        |                  |                    |         |         |              |          |                                               | 1455376 | A                  | 2204 |         |   |      |
|                                                                        |        |                  |                    |         |         |              |          |                                               | 1455377 | A                  | 1978 |         |   |      |
|                                                                        |        |                  |                    |         |         |              |          |                                               | 1455378 | T                  | 371  |         |   |      |

| sRNA                                                                     | Strand | Size mature form | Region of interest |         | Reads   | Coverage (%)                                               | Sequence | 5' end read number                                                                      |         | 3' end read number |        |         |   |        |
|--------------------------------------------------------------------------|--------|------------------|--------------------|---------|---------|------------------------------------------------------------|----------|-----------------------------------------------------------------------------------------|---------|--------------------|--------|---------|---|--------|
| tracrRNA                                                                 | →      | tracrRNA1        | 65                 | 1455502 | 1455566 | 833829                                                     | 8.4105   | AAGAAAATTAA AAGGGACTAAAATAAAGAGT<br>TTGCGGGACTCTGCGGGTTACAATCCCCTAA<br>AACCGCTTTT       | 1455496 | T                  | 1      | 1455565 | G | 12371  |
|                                                                          |        | tracrRNA2        | 58                 | 1455509 | 1455566 |                                                            |          |                                                                                         | 1455497 | A                  | 31     | 1455566 | C | 713292 |
|                                                                          |        |                  |                    |         |         |                                                            |          |                                                                                         | 1455498 | A                  | 27     | 1455567 | T | 74594  |
|                                                                          |        |                  |                    |         |         |                                                            |          |                                                                                         | 1455499 | G                  | 24     | 1455568 | T | 10412  |
|                                                                          |        |                  |                    |         |         |                                                            |          |                                                                                         | 1455500 | A                  | 19     | 1455569 | T | 9580   |
|                                                                          |        |                  |                    |         |         |                                                            |          |                                                                                         | 1455501 | A                  | 232    | 1455570 | T | 426    |
|                                                                          |        |                  |                    |         |         |                                                            |          |                                                                                         | 1455502 | A                  | 435    | 1455571 | A | 91     |
|                                                                          |        |                  |                    |         |         |                                                            |          |                                                                                         | 1455503 | T                  | 369    | 1455572 | A | 97     |
|                                                                          |        |                  |                    |         |         |                                                            |          |                                                                                         | 1455504 | T                  | 253    | 1455573 | A | 542    |
|                                                                          |        |                  |                    |         |         |                                                            |          |                                                                                         | 1455505 | T                  | 85     |         |   |        |
|                                                                          |        |                  |                    |         |         |                                                            |          |                                                                                         | 1455506 | A                  | 65     |         |   |        |
|                                                                          |        |                  |                    |         |         |                                                            |          |                                                                                         | 1455507 | A                  | 193    |         |   |        |
|                                                                          |        |                  |                    |         |         |                                                            |          |                                                                                         | 1455508 | A                  | 33472  |         |   |        |
|                                                                          |        |                  |                    |         |         |                                                            |          |                                                                                         | 1455509 | A                  | 615001 |         |   |        |
|                                                                          |        |                  |                    |         |         |                                                            |          |                                                                                         | 1455510 | A                  | 131879 |         |   |        |
|                                                                          |        |                  |                    |         |         |                                                            | 1455511  | G                                                                                       | 16444   |                    |        |         |   |        |
|                                                                          |        |                  |                    |         |         |                                                            | 1455512  | G                                                                                       | 9390    |                    |        |         |   |        |
|                                                                          |        |                  |                    |         |         |                                                            | 1455513  | G                                                                                       | 1053    |                    |        |         |   |        |
| <b>F. novicida U112 (NC_008601.1), total mapped reads: 48205</b>         |        |                  |                    |         |         |                                                            |          |                                                                                         |         |                    |        |         |   |        |
| crRNA<br>13 spacers                                                      | ←      | crRNA5           | 52                 | 817556  | 817607  | 117                                                        | 0.2427   | ATAACTCGACCAATATTTGACAAAGTTTCAGT<br>TGCTGAATTATTTGGTAAACCT                              | 817612  | T                  | 10     | 817557  | A | 3      |
|                                                                          |        |                  |                    |         |         |                                                            |          |                                                                                         | 817611  | T                  | 10     | 817556  | C | 55     |
|                                                                          |        |                  |                    |         |         |                                                            |          |                                                                                         | 817607  | A                  | 53     | 817555  | T | 13     |
|                                                                          |        |                  |                    |         |         |                                                            |          |                                                                                         | 817606  | T                  | 7      | 817553  | C | 12     |
|                                                                          |        |                  |                    |         |         |                                                            |          |                                                                                         |         |                    |        | 817552  | T | 1      |
|                                                                          |        | crRNA6           | 56                 | 817627  | 817682  | 116                                                        | 0.2406   | GGCAGTTTTGTATGGTCATATAGGAGTGT<br>CAGTTGCTGAATTATTTGGTAAACCT                             | 817685  | A                  | 4      | 817629  | A | 4      |
|                                                                          |        |                  |                    |         |         |                                                            |          |                                                                                         | 817682  | G                  | 23     | 817628  | A | 3      |
|                                                                          |        |                  |                    |         |         |                                                            |          |                                                                                         | 817681  | G                  | 13     | 817627  | C | 53     |
|                                                                          |        |                  |                    |         |         |                                                            |          |                                                                                         | 817679  | A                  | 2      | 817626  | T | 20     |
|                                                                          |        |                  |                    |         |         |                                                            |          |                                                                                         | 817677  | G                  | 4      |         |   |        |
|                                                                          |        | crRNA7           | 66                 | 817699  | 817764  | 11                                                         | 0.0228   | AGCTATAGGGTTACCTATCTTTTGAGTGTGG<br>CAAATAAGTTTCAGTTGCTGAATTATTTGGTA<br>AACCT            | 817764  | A                  | 4      | 817699  | A | 2      |
|                                                                          |        |                  |                    |         |         |                                                            |          |                                                                                         | 817763  | G                  | 1      |         |   |        |
|                                                                          |        |                  |                    |         |         |                                                            |          |                                                                                         | 817754  | T                  | 4      |         |   |        |
|                                                                          |        |                  |                    |         |         |                                                            | 817745   | T                                                                                       | 2       |                    |        |         |   |        |
| crRNA9                                                                   | 53     | 817845           | 817897             | 24      | 0.0498  | ATGCTTTTAAACTACTGATATATACTTTCAG<br>TTGCTGAATTATTTGGTAAACCT | 817897   | A                                                                                       | 3       | 817845             | C      | 7       |   |        |
| tracrRNA                                                                 | ←      | tracrRNA1        | 74                 | 817065  | 817138  | 2808                                                       | 5.8251   | GTACCAATAAATTAATGCTCTGTAAATCATT<br>AAAGTATTTTGAACGGACCTCTGTTTGACACG<br>TCTGAATAACTAAAAA | 817140  | A                  | 2      | 817066  | A | 28     |
|                                                                          |        | tracrRNA2        | 64                 | 817065  | 817128  |                                                            |          |                                                                                         | 817139  | T                  | 2      | 817065  | C | 1523   |
|                                                                          |        |                  |                    |         |         |                                                            |          |                                                                                         | 817138  | G                  | 615    | 817064  | T | 440    |
|                                                                          |        |                  |                    |         |         |                                                            |          |                                                                                         | 817136  | A                  | 9      | 817063  | A | 7      |
|                                                                          |        |                  |                    |         |         |                                                            |          |                                                                                         | 817135  | C                  | 2      | 817062  | A | 10     |
|                                                                          |        |                  |                    |         |         |                                                            |          |                                                                                         | 817134  | C                  | 37     | 817061  | A | 19     |
|                                                                          |        |                  |                    |         |         |                                                            |          |                                                                                         | 817133  | A                  | 26     | 817060  | A | 14     |
|                                                                          |        |                  |                    |         |         |                                                            |          |                                                                                         | 817132  | A                  | 7      | 817059  | A | 6      |
|                                                                          |        |                  |                    |         |         |                                                            |          |                                                                                         | 817131  | A                  | 328    | 817058  | G | 5      |
|                                                                          |        |                  |                    |         |         |                                                            |          |                                                                                         | 817130  | T                  | 355    | 817057  | C | 32     |
|                                                                          |        |                  |                    |         |         |                                                            |          |                                                                                         | 817129  | A                  | 165    | 817055  | A | 10     |
|                                                                          |        |                  |                    |         |         |                                                            |          |                                                                                         | 817128  | A                  | 484    |         |   |        |
|                                                                          |        |                  |                    |         |         |                                                            |          |                                                                                         | 817127  | T                  | 24     |         |   |        |
|                                                                          |        |                  |                    |         |         |                                                            |          |                                                                                         | 817126  | T                  | 55     |         |   |        |
|                                                                          |        |                  |                    |         |         |                                                            |          |                                                                                         | 817125  | A                  | 32     |         |   |        |
|                                                                          |        |                  |                    |         |         |                                                            | 817124   | A                                                                                       | 19      |                    |        |         |   |        |
| <b>N. meningitidis Z2491 (NC_003116.1), total mapped reads: 13110087</b> |        |                  |                    |         |         |                                                            |          |                                                                                         |         |                    |        |         |   |        |
| crRNA<br>16 spacers                                                      | →      | crRNA1           | 48                 | 608456  | 608503  | 1346                                                       | 0.0103   | TATCCATTCCCAGCCGGAATTAAGTTGTAGC<br>TCCCTTTCATTTCCGAGT                                   | 608453  | T                  | 30     | 608500  | T | 25     |
|                                                                          |        |                  |                    |         |         |                                                            |          |                                                                                         | 608454  | G                  | 105    | 608501  | C | 77     |
|                                                                          |        |                  |                    |         |         |                                                            |          |                                                                                         | 608455  | T                  | 64     | 608502  | G | 175    |
|                                                                          |        |                  |                    |         |         |                                                            |          |                                                                                         | 608456  | A                  | 259    | 608503  | C | 293    |
|                                                                          |        |                  |                    |         |         |                                                            |          |                                                                                         | 608457  | T                  | 4      | 608504  | A | 78     |
|                                                                          |        |                  |                    |         |         |                                                            |          |                                                                                         | 608458  | C                  | 21     | 608505  | G | 505    |
|                                                                          |        |                  |                    |         |         |                                                            |          |                                                                                         | 608459  | C                  | 175    | 608507  | T | 1      |
|                                                                          |        |                  |                    |         |         |                                                            |          |                                                                                         | 608460  | A                  | 118    |         |   |        |
|                                                                          |        |                  |                    |         |         |                                                            |          |                                                                                         | 608461  | T                  | 39     |         |   |        |
|                                                                          |        | crRNA2           | 50                 | 608520  | 608569  | 685                                                        | 0.0052   | GCCTTTTACAAGCTCGCTTTCCTTTGTTGAG<br>CTCCCTTTCATTTCCGAGT                                  | 608517  | T                  | 5      | 608564  | T | 8      |
|                                                                          |        |                  |                    |         |         |                                                            |          |                                                                                         | 608518  | C                  | 41     | 608565  | T | 16     |
|                                                                          |        |                  |                    |         |         |                                                            |          |                                                                                         | 608519  | T                  | 7      | 608566  | T | 8      |
|                                                                          |        |                  |                    |         |         |                                                            |          |                                                                                         | 608520  | G                  | 61     | 608567  | C | 31     |
|                                                                          |        |                  |                    |         |         |                                                            | 608521   | C                                                                                       | 21      | 608568             | G      | 101     |   |        |
|                                                                          |        |                  |                    |         |         |                                                            | 608522   | C                                                                                       | 44      | 608569             | C      | 173     |   |        |
|                                                                          |        |                  |                    |         |         |                                                            | 608523   | T                                                                                       | 21      | 608570             | A      | 43      |   |        |
|                                                                          |        |                  |                    |         |         |                                                            | 608524   | T                                                                                       | 31      | 608571             | G      | 6       |   |        |
|                                                                          |        |                  |                    |         |         |                                                            | 608525   | T                                                                                       | 17      | 608572             | T      | 2       |   |        |

| sRNA    | Strand | Size mature form | Region of interest | Reads | Coverage (%) | Sequence                                                  | 5' end read number | 3' end read number |        |        |        |                                                                                           |                                                            |        |      |        |        |      |       |
|---------|--------|------------------|--------------------|-------|--------------|-----------------------------------------------------------|--------------------|--------------------|--------|--------|--------|-------------------------------------------------------------------------------------------|------------------------------------------------------------|--------|------|--------|--------|------|-------|
| crRNA3  | 50     | 608586           | 608635             | 12402 | 0.0946       | TAAAGGTTTCTGTGCGACCCGAATGTTGTAG<br>CTCCCTTCTCATTTCGCAGT   | 608583             | T                  | 5      | 608631 | T      | 75                                                                                        |                                                            |        |      |        |        |      |       |
|         |        |                  |                    |       |              |                                                           | 608584             | G                  | 3      | 608632 | T      | 114                                                                                       |                                                            |        |      |        |        |      |       |
|         |        |                  |                    |       |              |                                                           | 608585             | G                  | 513    | 608633 | C      | 414                                                                                       |                                                            |        |      |        |        |      |       |
|         |        |                  |                    |       |              |                                                           | 608586             | T                  | 2243   | 608634 | G      | 1510                                                                                      |                                                            |        |      |        |        |      |       |
|         |        |                  |                    |       |              |                                                           | 608587             | A                  | 2091   | 608635 | C      | 2219                                                                                      |                                                            |        |      |        |        |      |       |
|         |        |                  |                    |       |              |                                                           | 608588             | A                  | 188    | 608636 | A      | 297                                                                                       |                                                            |        |      |        |        |      |       |
|         |        |                  |                    |       |              |                                                           | 608589             | A                  | 233    | 608637 | G      | 52                                                                                        |                                                            |        |      |        |        |      |       |
|         |        |                  |                    |       |              |                                                           | 608590             | G                  | 744    | 608638 | T      | 8                                                                                         |                                                            |        |      |        |        |      |       |
|         |        |                  |                    |       |              |                                                           | 608591             | G                  | 1152   |        |        |                                                                                           |                                                            |        |      |        |        |      |       |
|         |        |                  |                    |       |              |                                                           | crRNA4             | 49                 | 608653 | 608701 | 26361  | 0.2011                                                                                    | TAACTTTGACCGTGTGCAATCCAGTTAGTTGT<br>AGCTCCCTTCTCATTTCGCAGT | 608646 | T    | 7      | 608697 | T    | 295   |
|         |        |                  |                    |       |              |                                                           |                    |                    |        |        |        |                                                                                           |                                                            | 608647 | C    | 127    | 608698 | T    | 569   |
|         |        |                  |                    |       |              |                                                           |                    |                    |        |        |        |                                                                                           |                                                            | 608648 | T    | 203    | 608699 | C    | 1167  |
| 608649  | T      | 377              | 608700             | G     | 4910         |                                                           |                    |                    |        |        |        |                                                                                           |                                                            |        |      |        |        |      |       |
| 608650  | T      | 2751             | 608701             | C     | 4968         |                                                           |                    |                    |        |        |        |                                                                                           |                                                            |        |      |        |        |      |       |
| 608651  | A      | 477              | 608702             | A     | 764          |                                                           |                    |                    |        |        |        |                                                                                           |                                                            |        |      |        |        |      |       |
| 608652  | A      | 1334             | 608703             | G     | 62           |                                                           |                    |                    |        |        |        |                                                                                           |                                                            |        |      |        |        |      |       |
| 608653  | C      | 11694            | 608704             | T     | 4            |                                                           |                    |                    |        |        |        |                                                                                           |                                                            |        |      |        |        |      |       |
| 608654  | T      | 3665             |                    |       |              |                                                           |                    |                    |        |        |        |                                                                                           |                                                            |        |      |        |        |      |       |
| 608655  | T      | 382              |                    |       |              |                                                           |                    |                    |        |        |        |                                                                                           |                                                            |        |      |        |        |      |       |
| crRNA5  | 49     | 608719           | 608767             | 28747 | 0.2193       | AACCCACTAAATTTTGCAARTGCGTTGTAGC<br>TCCTTCTCATTTCGCAGT     |                    |                    |        |        |        |                                                                                           |                                                            | 608717 | G    | 20     | 608764 | T    | 426   |
|         |        |                  |                    |       |              |                                                           |                    |                    |        |        |        |                                                                                           |                                                            | 608718 | C    | 1171   | 608765 | C    | 1316  |
|         |        |                  |                    |       |              |                                                           | 608719             | A                  | 8128   | 608766 | G      | 3040                                                                                      |                                                            |        |      |        |        |      |       |
|         |        |                  |                    |       |              |                                                           | 608720             | A                  | 116    | 608767 | C      | 6431                                                                                      |                                                            |        |      |        |        |      |       |
|         |        |                  |                    |       |              |                                                           | 608721             | C                  | 59     | 608768 | A      | 1049                                                                                      |                                                            |        |      |        |        |      |       |
|         |        |                  |                    |       |              |                                                           | 608722             | C                  | 420    | 608769 | G      | 102                                                                                       |                                                            |        |      |        |        |      |       |
|         |        |                  |                    |       |              |                                                           | 608723             | C                  | 1089   | 608770 | T      | 11                                                                                        |                                                            |        |      |        |        |      |       |
|         |        |                  |                    |       |              |                                                           | 608724             | A                  | 557    |        |        |                                                                                           |                                                            |        |      |        |        |      |       |
|         |        |                  |                    |       |              |                                                           | crRNA6             | 50                 | 608784 | 608833 | 121014 | 0.9231                                                                                    | TTTTTTGTACTGTTGTTTGAACGAGTTGTAG<br>CTCCCTTCTCATTTCGCAGT    | 608781 | G    | 42     | 608830 | T    | 2295  |
|         |        |                  |                    |       |              |                                                           |                    |                    |        |        |        |                                                                                           |                                                            | 608782 | C    | 630    | 608831 | C    | 7060  |
|         |        |                  |                    |       |              |                                                           |                    |                    |        |        |        |                                                                                           |                                                            | 608783 | C    | 10039  | 608832 | G    | 13864 |
|         |        |                  |                    |       |              |                                                           |                    |                    |        |        |        |                                                                                           |                                                            | 608784 | T    | 26026  | 608833 | C    | 44472 |
| 608785  | T      | 11430            | 608834             | A     | 6853         |                                                           |                    |                    |        |        |        |                                                                                           |                                                            |        |      |        |        |      |       |
| 608786  | T      | 8248             | 608835             | G     | 802          |                                                           |                    |                    |        |        |        |                                                                                           |                                                            |        |      |        |        |      |       |
| 608787  | T      | 3648             | 608836             | T     | 69           |                                                           |                    |                    |        |        |        |                                                                                           |                                                            |        |      |        |        |      |       |
| crRNA7  | 52     | 608848           | 608899             | 24611 | 0.1877       | TTCGTTTCAGATAGCAACCGCAGTAGTGTGT<br>AGCTCCCTTCTCATTTCGCAGT |                    |                    |        |        |        |                                                                                           |                                                            | 608846 | A    | 28     | 608896 | T    | 369   |
|         |        |                  |                    |       |              |                                                           |                    |                    |        |        |        |                                                                                           |                                                            | 608847 | A    | 631    | 608897 | C    | 1114  |
|         |        |                  |                    |       |              |                                                           |                    |                    |        |        |        |                                                                                           |                                                            | 608848 | T    | 11039  | 608898 | G    | 3441  |
|         |        |                  |                    |       |              |                                                           |                    |                    |        |        |        |                                                                                           |                                                            | 608849 | T    | 753    | 608899 | C    | 9015  |
|         |        |                  |                    |       |              |                                                           |                    |                    |        |        |        |                                                                                           |                                                            | 608850 | C    | 239    | 608900 | A    | 1558  |
|         |        |                  |                    |       |              |                                                           | 608851             | G                  | 2205   | 608901 | G      | 137                                                                                       |                                                            |        |      |        |        |      |       |
|         |        |                  |                    |       |              |                                                           | 608852             | T                  | 1910   | 608902 | T      | 8                                                                                         |                                                            |        |      |        |        |      |       |
|         |        |                  |                    |       |              |                                                           | 608853             | T                  | 826    |        |        |                                                                                           |                                                            |        |      |        |        |      |       |
|         |        |                  |                    |       |              |                                                           | 84                 | 608916             | 608999 | 901    | 0.0069 | ATATGACGGTGGGCAACTGGTACAGTTGTAG<br>CTCCCTTCTCATTTCGCAGTGTACAATGCC<br>GGATATGACGGTGGGCAACT | 608913                                                     | C      | 6    | 608996 | A      | 6    |       |
|         |        |                  |                    |       |              |                                                           |                    |                    |        |        |        |                                                                                           | 608914                                                     | G      | 3    | 608997 | A      | 2    |       |
|         |        |                  |                    |       |              |                                                           |                    |                    |        |        |        |                                                                                           | 608915                                                     | G      | 2    | 608998 | C      | 2    |       |
|         |        |                  |                    |       |              |                                                           |                    |                    |        |        |        |                                                                                           | 608916                                                     | A      | 266  | 608999 | T      | 259  |       |
| 608917  | T      | 17               | 609000             | G     | 171          |                                                           |                    |                    |        |        |        |                                                                                           |                                                            |        |      |        |        |      |       |
| 608918  | A      | 96               | 609001             | G     | 24           |                                                           |                    |                    |        |        |        |                                                                                           |                                                            |        |      |        |        |      |       |
| 608919  | T      | 26               | 609004             | T     | 16           |                                                           |                    |                    |        |        |        |                                                                                           |                                                            |        |      |        |        |      |       |
| crRNA10 | 49     | 609049           | 609097             | 5027  | 0.0383       | CTTTTGATGATTCAAGGTGCTTGTGTAGC<br>TCCTTCTCATTTCGCAGT       |                    |                    |        |        |        |                                                                                           | 609046                                                     | T      | 89   | 609094 | T      | 81   |       |
|         |        |                  |                    |       |              |                                                           |                    |                    |        |        |        |                                                                                           | 609047                                                     | C      | 37   | 609095 | C      | 218  |       |
|         |        |                  |                    |       |              |                                                           |                    |                    |        |        |        |                                                                                           | 609048                                                     | G      | 647  | 609096 | G      | 845  |       |
|         |        |                  |                    |       |              |                                                           |                    |                    |        |        |        |                                                                                           | 609049                                                     | C      | 1614 | 609097 | C      | 1237 |       |
|         |        |                  |                    |       |              |                                                           |                    |                    |        |        |        |                                                                                           | 609050                                                     | T      | 583  | 609098 | A      | 219  |       |
|         |        |                  |                    |       |              |                                                           | 609051             | T                  | 208    | 609099 | G      | 36                                                                                        |                                                            |        |      |        |        |      |       |
|         |        |                  |                    |       |              |                                                           | 609052             | T                  | 104    | 609101 | G      | 7                                                                                         |                                                            |        |      |        |        |      |       |
|         |        |                  |                    |       |              |                                                           | 609053             | T                  | 18     |        |        |                                                                                           |                                                            |        |      |        |        |      |       |
|         |        |                  |                    |       |              |                                                           | crRNA11            | 52                 | 609112 | 609163 | 22711  | 0.1732                                                                                    | ATTTCGTGATGATGAACTCGAGCATGTTGT<br>AGCTCCCTTCTCATTTCGCAGT   | 609109 | A    | 58     | 609160 | T    | 540   |
|         |        |                  |                    |       |              |                                                           |                    |                    |        |        |        |                                                                                           |                                                            | 609110 | G    | 331    | 609161 | C    | 1263  |
|         |        |                  |                    |       |              |                                                           |                    |                    |        |        |        |                                                                                           |                                                            | 609111 | T    | 99     | 609162 | G    | 2850  |
|         |        |                  |                    |       |              |                                                           |                    |                    |        |        |        |                                                                                           |                                                            | 609112 | A    | 10627  | 609163 | C    | 4882  |
| 609113  | T      | 1234             | 609164             | A     | 552          |                                                           |                    |                    |        |        |        |                                                                                           |                                                            |        |      |        |        |      |       |
| 609114  | T      | 66               | 609165             | G     | 52           |                                                           |                    |                    |        |        |        |                                                                                           |                                                            |        |      |        |        |      |       |
| 609115  | C      | 191              | 609166             | T     | 15           |                                                           |                    |                    |        |        |        |                                                                                           |                                                            |        |      |        |        |      |       |
| 609116  | G      | 4906             |                    |       |              |                                                           |                    |                    |        |        |        |                                                                                           |                                                            |        |      |        |        |      |       |
| 609117  | T      | 136              |                    |       |              |                                                           |                    |                    |        |        |        |                                                                                           |                                                            |        |      |        |        |      |       |
| crRNA12 | 52     | 609178           | 609229             | 5067  | 0.0386       | TAGCCAGTGTAAAACCGCACCCGCTTGTGT<br>AGCTCCCTTCTCATTTCGCAGT  |                    |                    |        |        |        |                                                                                           |                                                            | 609175 | G    | 4      | 609226 | T    | 57    |
|         |        |                  |                    |       |              |                                                           |                    |                    |        |        |        |                                                                                           |                                                            | 609176 | G    | 3      | 609227 | C    | 189   |
|         |        |                  |                    |       |              |                                                           |                    |                    |        |        |        |                                                                                           |                                                            | 609177 | G    | 42     | 609228 | G    | 576   |
|         |        |                  |                    |       |              |                                                           | 609178             | T                  | 897    | 609229 | C      | 1348                                                                                      |                                                            |        |      |        |        |      |       |
|         |        |                  |                    |       |              |                                                           | 609179             | A                  | 72     | 609230 | A      | 321                                                                                       |                                                            |        |      |        |        |      |       |
|         |        |                  |                    |       |              |                                                           | 609180             | G                  | 584    | 609231 | G      | 33                                                                                        |                                                            |        |      |        |        |      |       |
|         |        |                  |                    |       |              |                                                           | 609181             | C                  | 154    | 609232 | T      | 2                                                                                         |                                                            |        |      |        |        |      |       |
|         |        |                  |                    |       |              |                                                           | 609182             | C                  | 314    |        |        |                                                                                           |                                                            |        |      |        |        |      |       |
|         |        |                  |                    |       |              |                                                           | 609183             | A                  | 38     |        |        |                                                                                           |                                                            |        |      |        |        |      |       |

| sRNA                                                                                                         | Strand | Size mature form | Region of interest | Reads   | Coverage (%) | Sequence | 5' end read number | 3' end read number                                                                                                                                                                                           |                                                                                                                                                                                                                                                                                                                                                                                                                                                                                                                                                                |
|--------------------------------------------------------------------------------------------------------------|--------|------------------|--------------------|---------|--------------|----------|--------------------|--------------------------------------------------------------------------------------------------------------------------------------------------------------------------------------------------------------|----------------------------------------------------------------------------------------------------------------------------------------------------------------------------------------------------------------------------------------------------------------------------------------------------------------------------------------------------------------------------------------------------------------------------------------------------------------------------------------------------------------------------------------------------------------|
|                                                                                                              |        | crRNA13          | 51                 | 609245  | 609295       | 4666     | 0.0356             | ATAGAAATACATACGCCGAGTAATTAGTTGTA<br>GCTCCCTTTCTCATTTCGCAGT                                                                                                                                                   | 609243 A 6 609292 T 65<br>609244 A 62 609293 C 201<br>609245 A 1311 609294 G 475<br>609246 T 141 609295 C 1039<br>609247 A 116 609296 A 229<br>609248 G 44 609297 G 25<br>609298 T 1                                                                                                                                                                                                                                                                                                                                                                           |
|                                                                                                              |        | crRNA14          | 51                 | 609311  | 609361       | 7147     | 0.0545             | TTTTTGTAATTGTTCTGCCTTTTTAGTTGTA<br>GCTCCCTTTCTCATTTCGCAGT                                                                                                                                                    | 609308 T 12 609358 T 136<br>609309 T 22 609359 C 442<br>609310 C 207 609360 G 858<br>609311 T 1190 609361 C 2335<br>609312 T 774 609362 A 540<br>609313 T 577 609363 G 69<br>609314 T 195 609364 T 5<br>609315 T 37                                                                                                                                                                                                                                                                                                                                            |
|                                                                                                              |        | crRNA15          | 50                 | 609378  | 609427       | 49818    | 0.3800             | ACGGCGGAAACCATTGCCACAAACGTTGTAG<br>CTCCCTTTCTCATTTCGCAGT                                                                                                                                                     | 609375 C 319 609424 T 532<br>609376 C 7253 609425 C 1414<br>609377 C 7249 609426 G 2553<br>609378 A 19015 609427 C 7448<br>609379 C 547 609428 A 1854<br>609380 G 307 609429 G 210<br>609381 G 190 609430 T 10                                                                                                                                                                                                                                                                                                                                                 |
|                                                                                                              |        | crRNA16          | 50                 | 609444  | 609493       | 42398    | 0.3234             | AATAATAACCCCAATACAGATGTTAAGTTGTA<br>GCTCCCTTTCTCATTTCGCAGT                                                                                                                                                   | 609441 A 8 609490 T 579<br>609442 A 548 609491 C 2197<br>609443 A 3686 609492 G 6466<br>609444 A 4638 609493 C 13217<br>609445 T 1428 609494 A 2438<br>609446 A 2861 609495 G 200<br>609447 A 1322 609496 T 12<br>609448 T 287                                                                                                                                                                                                                                                                                                                                 |
| tracrRNA                                                                                                     | →      | tracrRNA1        | 163                | 614162  | 614324       | 208318   | 1.5890             | TTGTCCTATTATATACAAATAGATTATTGAC<br>TTATCATCTCACACCGCTAGAAATCCCAAAACA<br>TATTGTCGCACCTGC <del>GA</del> AATGAGAACCGTTGCT<br>ACAATAAGGCCCTCTGAAAAGATGTCCCGCAA<br>CGCTCTGCCCTTAAAGCTTCTGCTTTAAGGG<br>GCATCGTTTAT | 614158 C 1 614319 G 311<br>614161 A 1 614320 G 109<br>614162 T 2 614321 G 258<br>614164 G 1 614322 G 150<br>614223 A 596 614323 C 41244<br>614224 C 39 614324 A 128531<br>614225 A 14761 614325 T 167<br>614226 T 169 614326 C 4197<br>614227 A 276 614327 G 36<br>614239 C 208 614328 T 122<br>614240 G 42037 614329 T 865<br>614241 A 39965 614330 T 1132<br>614242 A 22890 614331 A 1061<br>614243 A 51186 614332 T 2788<br>614244 T 17711 614333 T 3758<br>614245 G 4192 614334 T 77<br>614246 A 488 614335 C 18<br>614336 G 3<br>614337 G 3<br>614338 T 1 |
| <b>L. innocua Clip11262 (NC_003212.1), total mapped reads: 161865 (Note: low quality of the RNA library)</b> |        |                  |                    |         |              |          |                    |                                                                                                                                                                                                              |                                                                                                                                                                                                                                                                                                                                                                                                                                                                                                                                                                |
| crRNA<br>10 spacers                                                                                          | ←      | crRNA1           | 35                 | 2769606 | 2769640      | 2        | 0.0012             | GGTAACCTTGCCTAGGATAGTTTTAGAGCTAT<br>GT                                                                                                                                                                       | 2769640 G 1 2769606 T 1                                                                                                                                                                                                                                                                                                                                                                                                                                                                                                                                        |
|                                                                                                              |        | crRNA2           | 22                 | 2769540 | 2769561      | 2        | 0.0012             | CATTATGTTTTAGAGCTATGT                                                                                                                                                                                        | 2769561 C 1 2769540 T 1<br>2769560 A 1                                                                                                                                                                                                                                                                                                                                                                                                                                                                                                                         |
|                                                                                                              |        | crRNA3           | 24                 | 2769468 | 2769491      | 3        | 0.0019             | GAGTTTTAGAGCTATGT ATTTG                                                                                                                                                                                      | 2769491 G 3 2769468 G 1                                                                                                                                                                                                                                                                                                                                                                                                                                                                                                                                        |
|                                                                                                              |        | crRNA4           | 27                 | 2769402 | 2769428      | 7        | 0.0043             | TTATAGTTTTAGAGCTATGT ATTTG                                                                                                                                                                                   | 2769428 T 5 2769407 A 1<br>2769427 T 2 2769406 T 1<br>2769405 T 1<br>2769403 T 1<br>2769402 G 1                                                                                                                                                                                                                                                                                                                                                                                                                                                                |
|                                                                                                              |        | crRNA5           | 26                 | 2769337 | 2769362      | 5        | 0.0031             | TAAATGTTTTAGAGCTATGT ATTT                                                                                                                                                                                    | 2769362 T 3 2769339 T 1<br>2769360 A 2 2769337 T 2                                                                                                                                                                                                                                                                                                                                                                                                                                                                                                             |
|                                                                                                              |        | crRNA8           | 23                 | 2769142 | 2769164      | 2        | 0.0012             | TACAAGTTTTAGAGCTATGT AT                                                                                                                                                                                      | 2769164 T 1 2769143 A 1<br>2769163 A 1 2769142 T 1                                                                                                                                                                                                                                                                                                                                                                                                                                                                                                             |
|                                                                                                              |        | crRNA9           | 30                 | 2769072 | 2769101      | 19       | 0.0117             | TTTCATGTTGTTTTAGAGCTATGT ATTTG                                                                                                                                                                               | 2769101 T 6 2769079 T 4<br>2769100 T 1 2769078 T 1<br>2769099 C 4 2769075 T 2<br>2769098 A 3 2769073 T 3<br>2769097 T 3 2769072 G 6<br>2769096 G 2                                                                                                                                                                                                                                                                                                                                                                                                             |
|                                                                                                              |        | crRNA10          | 28                 | 2769000 | 2769027      | 19       | 0.0117             | GTTTTAGAGCTATGCTATTTCCGAATACT                                                                                                                                                                                | 2769027 G 1 2769000 T 1                                                                                                                                                                                                                                                                                                                                                                                                                                                                                                                                        |

| sRNA                                                              | Strand | Size mature form | Region of interest |         | Reads   | Coverage (%) | Sequence | 5' end read number                              |         | 3' end read number |         |         |         |         |        |        |                                                 |         |   |        |         |   |       |
|-------------------------------------------------------------------|--------|------------------|--------------------|---------|---------|--------------|----------|-------------------------------------------------|---------|--------------------|---------|---------|---------|---------|--------|--------|-------------------------------------------------|---------|---|--------|---------|---|-------|
| tracrRNA                                                          | →      | tracrRNA1        | 90                 | 2774774 | 2774863 | 367          | 0.2267   | ATTGTTAGTATTCAAA AACATAGCAAGTTA                 | 2774774 | A                  | 34      | 2774861 | T       | 2       |        |        |                                                 |         |   |        |         |   |       |
|                                                                   |        | tracrRNA2        | 76                 | 2774788 | 2774863 |              |          | AAATAAGGCTTTGTCGGTTATCAACTTTTAAAT               | 2774783 | A                  | 1       | 2774862 | T       | 47      |        |        |                                                 |         |   |        |         |   |       |
|                                                                   |        | tracrRNA3        | 68                 | 2774796 | 2774863 |              |          | TAAGTAGCGCTGTTTCGGCGCTTTT                       | 2774786 | C                  | 1       | 2774863 | T       | 150     |        |        |                                                 |         |   |        |         |   |       |
|                                                                   |        |                  |                    |         |         |              |          |                                                 | 2774787 | A                  | 1       | 2774864 | T       | 67      |        |        |                                                 |         |   |        |         |   |       |
|                                                                   |        |                  |                    |         |         |              |          | 2774788                                         | A       | 22                 | 2774865 | T       | 30      |         |        |        |                                                 |         |   |        |         |   |       |
|                                                                   |        |                  |                    |         |         |              |          | 2774794                                         | C       | 1                  | 2774866 | G       | 15      |         |        |        |                                                 |         |   |        |         |   |       |
|                                                                   |        |                  |                    |         |         |              |          | 2774795                                         | A       | 1                  | 2774867 | T       | 6       |         |        |        |                                                 |         |   |        |         |   |       |
|                                                                   |        |                  |                    |         |         |              |          | 2774796                                         | T       | 5                  |         |         |         |         |        |        |                                                 |         |   |        |         |   |       |
|                                                                   |        |                  |                    |         |         |              |          | 2774797                                         | A       | 2                  |         |         |         |         |        |        |                                                 |         |   |        |         |   |       |
|                                                                   |        |                  |                    |         |         |              |          | 2774799                                         | C       | 5                  |         |         |         |         |        |        |                                                 |         |   |        |         |   |       |
|                                                                   |        |                  |                    |         |         |              |          | 2774801                                         | A       | 1                  |         |         |         |         |        |        |                                                 |         |   |        |         |   |       |
| <b>S. mutans UA159 (NC_004350.2), total mapped reads: 1542239</b> |        |                  |                    |         |         |              |          |                                                 |         |                    |         |         |         |         |        |        |                                                 |         |   |        |         |   |       |
| crRNA<br>5 spacers                                                | ←      | crRNA1           | 38                 | 1328162 | 1328199 | 267104       | 17.3192  | GCCATTAAATTAATGGTGAGTTTTAGAGCTG<br>T@TTGTTTCGA  | 1328201 | A                  | 8       | 1328166 | G       | 18547   |        |        |                                                 |         |   |        |         |   |       |
|                                                                   |        |                  |                    |         |         |              |          |                                                 | 1328200 | C                  | 178     | 1328165 | T       | 41345   |        |        |                                                 |         |   |        |         |   |       |
|                                                                   |        |                  |                    |         |         |              |          |                                                 | 1328199 | G                  | 264047  | 1328164 | T       | 53386   |        |        |                                                 |         |   |        |         |   |       |
|                                                                   |        |                  |                    |         |         |              |          |                                                 | 1328198 | C                  | 191     | 1328163 | G       | 9084    |        |        |                                                 |         |   |        |         |   |       |
|                                                                   |        |                  |                    |         |         |              |          |                                                 | 1328197 | C                  | 167     | 1328162 | T       | 59197   |        |        |                                                 |         |   |        |         |   |       |
|                                                                   |        |                  |                    |         |         |              |          |                                                 | 1328196 | A                  | 117     | 1328161 | T       | 28333   |        |        |                                                 |         |   |        |         |   |       |
|                                                                   |        |                  |                    |         |         |              |          |                                                 |         |                    |         | 1328160 | T       | 4240    |        |        |                                                 |         |   |        |         |   |       |
|                                                                   |        |                  |                    |         |         |              |          |                                                 |         |                    |         | 1328159 | C       | 18236   |        |        |                                                 |         |   |        |         |   |       |
|                                                                   |        |                  |                    |         |         |              |          |                                                 |         |                    |         | 1328158 | G       | 26742   |        |        |                                                 |         |   |        |         |   |       |
|                                                                   |        |                  |                    |         |         |              |          |                                                 |         |                    |         | 1328157 | A       | 5573    |        |        |                                                 |         |   |        |         |   |       |
|                                                                   |        |                  | 1328156            | A       | 17      |              |          |                                                 |         |                    |         |         |         |         |        |        |                                                 |         |   |        |         |   |       |
|                                                                   |        | crRNA2           | 36                 | 1328098 | 1328133 | 26578        | 1.7233   | GCTAGCGCAGTTAGTCTCTGTTTTAGAGCTG<br>T@TTGTTTCGA  | 1328135 | C                  | 4       | 1328101 | T       | 37      |        |        |                                                 |         |   |        |         |   |       |
|                                                                   |        |                  |                    |         |         |              |          |                                                 | 1328134 | A                  | 13      | 1328100 | G       | 800     |        |        |                                                 |         |   |        |         |   |       |
|                                                                   |        |                  |                    |         |         |              |          |                                                 | 1328133 | G                  | 25656   | 1328099 | T       | 6395    |        |        |                                                 |         |   |        |         |   |       |
|                                                                   |        |                  |                    |         |         |              |          |                                                 | 1328132 | C                  | 212     | 1328098 | T       | 11256   |        |        |                                                 |         |   |        |         |   |       |
|                                                                   |        |                  |                    |         |         |              |          |                                                 | 1328131 | T                  | 25      | 1328097 | G       | 301     |        |        |                                                 |         |   |        |         |   |       |
|                                                                   |        |                  |                    |         |         |              |          |                                                 | 1328130 | A                  | 62      | 1328096 | T       | 1453    |        |        |                                                 |         |   |        |         |   |       |
|                                                                   |        |                  |                    |         |         |              |          |                                                 | 1328129 | G                  | 25      | 1328095 | T       | 1755    |        |        |                                                 |         |   |        |         |   |       |
|                                                                   |        |                  |                    |         |         |              |          |                                                 |         |                    |         | 1328094 | T       | 447     |        |        |                                                 |         |   |        |         |   |       |
|                                                                   |        |                  |                    |         |         |              |          |                                                 |         |                    |         | 1328093 | C       | 1302    |        |        |                                                 |         |   |        |         |   |       |
|                                                                   |        |                  |                    |         |         |              |          |                                                 |         |                    |         | 1328092 | G       | 1996    |        |        |                                                 |         |   |        |         |   |       |
|                                                                   |        |                  |                    |         |         |              |          |                                                 |         |                    |         | 1328091 | A       | 670     |        |        |                                                 |         |   |        |         |   |       |
|                                                                   |        |                  |                    |         |         |              |          |                                                 |         |                    |         | 1328090 | A       | 5       |        |        |                                                 |         |   |        |         |   |       |
|                                                                   |        |                  |                    |         |         |              |          |                                                 |         |                    | crRNA3  | 34      | 1328034 | 1328067 | 138134 | 8.9567 | TGTGTGTCATCATAGTTAGTTTTAGAGCTG<br>T@TTGTTTCGA   | 1328069 | G | 4      | 1328036 | G | 2880  |
|                                                                   |        |                  |                    |         |         |              |          |                                                 |         |                    |         |         |         |         |        |        |                                                 | 1328068 | C | 66     | 1328035 | T | 733   |
|                                                                   |        |                  |                    |         |         |              |          |                                                 |         |                    |         |         |         |         |        |        |                                                 | 1328067 | T | 134361 | 1328034 | G | 68203 |
|                                                                   |        |                  |                    |         |         |              |          |                                                 |         |                    |         |         |         |         |        |        |                                                 | 1328066 | G | 609    | 1328033 | T | 37212 |
|                                                                   |        |                  |                    |         |         |              |          |                                                 |         |                    |         |         |         |         |        |        |                                                 | 1328065 | T | 321    | 1328032 | T | 24528 |
|                                                                   |        |                  |                    |         |         |              |          |                                                 |         |                    |         |         |         |         |        |        |                                                 |         |   |        | 1328031 | G | 1003  |
|                                                                   |        |                  |                    |         |         |              |          |                                                 |         |                    |         |         |         |         |        |        |                                                 |         |   |        | 1328030 | T | 889   |
|                                                                   |        |                  | 1328029            | T       | 610     |              |          |                                                 |         |                    |         |         |         |         |        |        |                                                 |         |   |        |         |   |       |
|                                                                   |        |                  | 1328028            | T       | 124     |              |          |                                                 |         |                    |         |         |         |         |        |        |                                                 |         |   |        |         |   |       |
|                                                                   |        |                  | 1328027            | C       | 371     |              |          |                                                 |         |                    |         |         |         |         |        |        |                                                 |         |   |        |         |   |       |
|                                                                   |        |                  | 1328026            | G       | 546     |              |          |                                                 |         |                    |         |         |         |         |        |        |                                                 |         |   |        |         |   |       |
|                                                                   |        |                  | 1328025            | A       | 145     |              |          |                                                 |         |                    |         |         |         |         |        |        |                                                 |         |   |        |         |   |       |
|                                                                   |        | crRNA4           | 35                 | 1327967 | 1328001 | 104705       | 6.7892   | CAATTAGACAATAGACAAACGTTTTAGAGCTG<br>T@TTGTTTCGA |         |                    |         |         |         |         |        |        |                                                 | 1328003 | T | 8      | 1327969 | T | 348   |
|                                                                   |        |                  |                    |         |         |              |          |                                                 | 1328002 | T                  | 36      | 1327968 | G       | 8606    |        |        |                                                 |         |   |        |         |   |       |
|                                                                   |        |                  |                    |         |         |              |          |                                                 | 1328001 | C                  | 101017  | 1327967 | T       | 59863   |        |        |                                                 |         |   |        |         |   |       |
|                                                                   |        |                  |                    |         |         |              |          |                                                 | 1328000 | A                  | 681     | 1327966 | T       | 25845   |        |        |                                                 |         |   |        |         |   |       |
|                                                                   |        |                  |                    |         |         |              |          |                                                 | 1327999 | A                  | 216     | 1327965 | G       | 756     |        |        |                                                 |         |   |        |         |   |       |
|                                                                   |        |                  |                    |         |         |              |          |                                                 |         |                    |         | 1327964 | T       | 3053    |        |        |                                                 |         |   |        |         |   |       |
|                                                                   |        |                  |                    |         |         |              |          |                                                 |         |                    |         | 1327963 | T       | 1433    |        |        |                                                 |         |   |        |         |   |       |
|                                                                   |        |                  |                    |         |         |              |          |                                                 |         |                    |         | 1327962 | T       | 1602    |        |        |                                                 |         |   |        |         |   |       |
|                                                                   |        |                  |                    |         |         |              |          |                                                 |         |                    |         | 1327961 | C       | 864     |        |        |                                                 |         |   |        |         |   |       |
|                                                                   |        |                  |                    |         |         |              |          |                                                 |         |                    |         | 1327960 | G       | 839     |        |        |                                                 |         |   |        |         |   |       |
|                                                                   |        |                  |                    |         |         |              |          |                                                 |         |                    |         | 1327959 | A       | 322     |        |        |                                                 |         |   |        |         |   |       |
|                                                                   |        |                  |                    |         |         |              |          |                                                 |         |                    | crRNA5  | 37      | 1327899 | 1327935 | 63999  | 4.1497 | TTCGGACATGACTTGCCACAGTTTTAGAGCTG<br>T@TTGTTTCGA | 1327940 | A | 4      | 1327902 | G | 902   |
|                                                                   |        |                  |                    |         |         |              |          |                                                 |         |                    |         |         |         |         |        |        |                                                 | 1327937 | T | 6      | 1327901 | T | 3296  |
|                                                                   |        |                  |                    |         |         |              |          |                                                 |         |                    |         |         |         |         |        |        |                                                 | 1327936 | A | 17     | 1327900 | T | 12381 |
|                                                                   |        |                  |                    |         |         |              |          |                                                 |         |                    |         |         |         |         |        |        |                                                 | 1327935 | T | 62587  | 1327899 | G | 19843 |
| 1327934                                                           | T      | 1029             | 1327898            | T       | 2864    |              |          |                                                 |         |                    |         |         |         |         |        |        |                                                 |         |   |        |         |   |       |
| 1327933                                                           | C      | 108              | 1327897            | T       | 14180   |              |          |                                                 |         |                    |         |         |         |         |        |        |                                                 |         |   |        |         |   |       |
| 1327932                                                           | G      | 19               | 1327896            | T       | 2061    |              |          |                                                 |         |                    |         |         |         |         |        |        |                                                 |         |   |        |         |   |       |
| 1327931                                                           | G      | 36               | 1327895            | C       | 2079    |              |          |                                                 |         |                    |         |         |         |         |        |        |                                                 |         |   |        |         |   |       |
|                                                                   |        |                  | 1327894            | G       | 5259    |              |          |                                                 |         |                    |         |         |         |         |        |        |                                                 |         |   |        |         |   |       |
|                                                                   |        |                  | 1327893            | A       | 630     |              |          |                                                 |         |                    |         |         |         |         |        |        |                                                 |         |   |        |         |   |       |

| sRNA     | Strand | Size mature form | Region of interest |         | Reads   | Coverage (%) | Sequence | 5' end read number                                                                                                    |         | 3' end read number |         |         |    |    |
|----------|--------|------------------|--------------------|---------|---------|--------------|----------|-----------------------------------------------------------------------------------------------------------------------|---------|--------------------|---------|---------|----|----|
| tracrRNA | →      | tracrRNA1        | 102                | 1335040 | 1335141 | 1299         | 0.0842   | GTTGGAATCATTCGAAACAACAAGCAAGTTA<br>AAATAAGGCAGTGATTTTAAATCCAGTCCGTA<br>CACAACTTGAAAAAGTGCACCGATTCCGGTG<br>CTTTTATTATT | 1335038 | G                  | 1       | 1335140 | T  | 13 |
|          |        | tracrRNA2        | 88                 | 1335054 | 1335141 |              |          |                                                                                                                       | 1335040 | G                  | 466     | 1335141 | T  | 64 |
|          |        | tracrRNA3        | 80                 | 1335062 | 1335141 |              |          |                                                                                                                       | 1335041 | T                  | 6       | 1335142 | T  | 29 |
|          |        |                  |                    |         |         |              |          |                                                                                                                       | 1335042 | T                  | 1       | 1335143 | A  | 13 |
|          |        |                  |                    |         |         |              |          | 1335051                                                                                                               | T       | 4                  | 1335144 | T       | 6  |    |
|          |        |                  |                    |         |         |              |          | 1335053                                                                                                               | G       | 3                  | 1335145 | T       | 13 |    |
|          |        |                  |                    |         |         |              |          | 1335054                                                                                                               | A       | 415                | 1335146 | T       | 1  |    |
|          |        |                  |                    |         |         |              |          | 1335055                                                                                                               | A       | 2                  | 1335149 | T       | 1  |    |
|          |        |                  |                    |         |         |              |          | 1335057                                                                                                               | C       | 1                  |         |         |    |    |
|          |        |                  |                    |         |         |              |          | 1335058                                                                                                               | A       | 1                  |         |         |    |    |
|          |        |                  |                    |         |         |              |          | 1335062                                                                                                               | C       | 186                |         |         |    |    |
|          |        |                  |                    |         |         |              |          | 1335063                                                                                                               | A       | 15                 |         |         |    |    |

For the bacterial species studied, all tracrRNA orthologues and mature crRNAs retrieved by sequencing are listed, including coordinates (region of interest) and corresponding cDNA sequences (5' to 3').

The arrows represent the transcriptional direction (strand). Number of cDNA reads (calculated using SAMtools), coverage numbers (percentage of mapped reads) and predominant ends associated with each transcript are indicated.

Numbers of reads starting or stopping at each nucleotide position around the 5' and 3' ends of each transcript are displayed, the predominant ends are indicated in red in the sequence. The putative primary processing sites are indicated in dark blue (see Fig. 3). The sizes of each crRNA mature forms are indicated.

The number allocated to each crRNA species corresponds to the spacer sequence position in the pre-crRNA, according to the CRISPRdb. The number allocated to each tracrRNA species corresponds to different forms of the same transcript. Note that given the low quality of *L. innocua* cDNA library, values should be considered carefully.
